# Supplementary material for: A generative growth model for thalamocortical axonal branching in primary visual cortex
Source: PLoS Comput Biol. 2020 Feb 13;16(2):e1007315. doi: 10.1371/journal.pcbi.1007315 (PMC7018004; doi:10.1371/journal.pcbi.1007315)
Supplement: S1 Data — The segment-lengths as well as all data underlying the individual statistics of florets are provided for the biological data, for the floret generator models with and without retraction, and for the implementation of the floret-generator in Cx3D. (XLSX) [file pcbi.1007315.s013.xlsx]

## Sheet: Original Data
							Biological dataset
				For extraction, use e.g.:
				>> real_data = extractFeaturesSegments('XY_floret_dendrogram.xml');
				>> real_data = get_data(real_data);
				Individual statistics for biological and generated data								Segment-Lengths
X/Y	ON/OFF RF	Std of segment length	Mean of segment length	Mean of fitted distribution	Std of fitted distribution	Number of branches	Asymmetry	Average depth of florets	Maximal depth of florets	Floret ID		44.2396
Y	ON	42.1086	47.0432	3.55036	0.793198	53	0.605401	6.24528	12	31871		47.5124
Y	ON	0	17.3801	2.85533	0	1	0	1	1	809011		26.2997
Y	ON	92.3014	73.0336	3.62286	1.19867	19	0.871795	5.73684	10	1191295		84.1339
Y	ON	0	10.4974	2.35113	0	1	0	1	1	1446101		26.4856
Y	ON	59.0962	64.9886	3.77044	0.947966	37	0.431546	5.48649	9	1702033		50.1406
Y	ON	0	18.2469	2.90399	0	1	0	1	1	1705910		103.771
Y	ON	45.931	45.494	3.47273	1.00215	3	0	1.66667	2	1904772		23.736
Y	ON	0	42.0294	3.73837	0	1	0	1	1	2544107		71.4446
Y	ON	0	31.2148	3.44089	0	1	0	1	1	2767161		17.9963
Y	ON	9.77663	22.5871	2.98966	0.605319	9	0.333333	2.77778	4	3181964		257.533
Y	ON	47.5346	36.9551	2.71825	1.48188	9	0.333333	2.77778	4	3295160		14.5359
Y	ON	0	11.9661	2.48207	0	1	0	1	1	3428591		147.213
Y	ON	0	22.0964	3.09541	0	1	0	1	1	4132788		27.8986
Y	ON	0	19.3873	2.96462	0	1	0	1	1	4162198		41.6242
Y	ON	13.4076	23.8	3.01906	0.643718	5	0.5	2.2	3	4839672		83.9179
Y	ON	0	11.2447	2.4199	0	1	0	1	1	6074399		11.4121
Y	ON	0	63.18	4.14599	0	1	0	1	1	6430522		19.8007
Y	ON	0	11.0646	2.40375	0	1	0	1	1	6437653		59.4142
Y	ON	0	2.68024	0.985907	0	1	0	1	1	6534908		31.1181
Y	ON	0	38.6088	3.65348	0	1	0	1	1	7244189		33.9429
Y	ON	27.1656	38.0476	3.33361	0.895604	33	0.559028	4.57576	7	7560702		60.5948
Y	ON	0	34.4645	3.53993	0	1	0	1	1	7799570		52.6983
Y	ON	46.0089	51.7516	3.65096	0.967189	3	0	1.66667	2	10076216		26.3088
Y	ON	0	16.3858	2.79642	0	1	0	1	1	10365849		19.3439
Y	ON	6.59487	14.4182	2.60275	0.4363	3	0	1.66667	2	10695082		25.2667
Y	ON	0	25.5402	3.24025	0	1	0	1	1	10907800		104.569
Y	ON	29.0556	31.9793	3.02781	1.11224	7	0.444444	2.71429	4	11051975		22.0314
Y	ON	20.5464	25.4016	2.64297	1.67515	3	0	1.66667	2	11215222		64.2998
Y	ON	61.0715	78.9561	4.0815	1.01957	3	0	1.66667	2	11474097		76.0599
Y	ON	0	29.8963	3.39773	0	1	0	1	1	12458980		16.9113
Y	ON	0	83.8952	4.42957	0	1	0	1	1	12758498		84.191
Y	ON	22.7311	71.517	4.23894	0.297923	3	0	1.66667	2	13280681		63.6821
Y	ON	0	191.583	5.25532	0	1	0	1	1	13440642		12.6891
Y	ON	113.641	94.629	3.93642	1.43238	3	0	1.66667	2	13465257		24.2398
Y	ON	0	36.1102	3.58658	0	1	0	1	1	14966175		18.3425
Y	ON	0	8.46684	2.13616	0	1	0	1	1	15226358		37.4171
Y	ON	44.0675	45.7005	3.32221	1.18862	5	0.5	2.2	3	15347348		12.2482
Y	ON	0	38.8873	3.66067	0	1	0	1	1	16778324		3.13455
Y	ON	57.9945	60.5821	3.6604	0.981559	21	0.604902	5.47619	9	16836987		33.1991
Y	ON	0	38.9679	3.66274	0	1	0	1	1	17008846		95.2777
Y	ON	0	36.3787	3.59398	0	1	0	1	1	17242075		14.0422
Y	ON	0	18.7504	2.93121	0	1	0	1	1	17914428		35.4864
Y	ON	0	60.1136	4.09624	0	1	0	1	1	18816830		80.0394
Y	ON	0	285.8	5.65529	0	1	0	1	1	19076018		40.484
Y	ON	0	115.678	4.75081	0	1	0	1	1	19205217		8.70961
Y	ON	59.4725	60.7529	3.57964	1.17399	11	0.742857	3.72727	6	19231661		31.4394
Y	ON	0	39.0056	3.66371	0	1	0	1	1	20506885		71.597
Y	ON	45.3757	91.5253	4.42965	0.518582	3	0	1.66667	2	20718846		29.0109
Y	ON	5.48617	8.14611	1.95453	0.641198	3	0	1.66667	2	20861515		21.4082
Y	ON	0	48.5792	3.8832	0	1	0	1	1	21061350		45.9617
Y	ON	0	95.7272	4.5615	0	1	0	1	1	21250399		21.6762
Y	ON	31.8268	73.2813	4.21433	0.51803	3	0	1.66667	2	22302438		16.7608
Y	ON	0	143.333	4.96517	0	1	0	1	1	22847639		17.3801
Y	ON	34.9584	38.4456	3.31631	0.845982	23	0.612121	4.21739	7	23055876		28.6923
Y	ON	0	111.441	4.71349	0	1	0	1	1	23163538		67.3868
Y	ON	36.0766	43.515	3.53257	0.70193	17	0.542857	3.70588	5	23242258		329.88
Y	ON	0	26.4978	3.27706	0	1	0	1	1	23244769		54.2027
X	OFF	95.2192	61.5638	3.36199	1.26678	5	1	2.2	3	23678450		67.6342
X	OFF	0	42.0741	3.73943	0	1	0	1	1	25399555		229.31
X	OFF	12.0757	21.2397	2.94568	0.504911	5	1	2.2	3	25869289		52.3217
X	OFF	0	35.6184	3.57286	0	1	0	1	1	26208202		232.973
X	OFF	0	30.8031	3.42762	0	1	0	1	1	26497225		10.1988
X	OFF	0	11.8415	2.47161	0	1	0	1	1	26632246		135.624
X	OFF	86.3761	106.754	4.2471	1.10465	19	0.633333	3.84211	6	26765870		14.673
X	OFF	0	71.0763	4.26375	0	1	0	1	1	27008216		13.6501
X	OFF	0	87.7232	4.47419	0	1	0	1	1	27022183		17.7205
X	OFF	0	9.38657	2.23928	0	1	0	1	1	27030010		27.693
Y	ON	71.586	65.723	3.72905	1.10052	5	1	2.2	3	27154936		19.0304
Y	ON	0	44.5319	3.79621	0	1	0	1	1	27583868		3.63992
Y	ON	0	38.0104	3.63786	0	1	0	1	1	28592673		11.7219
Y	ON	0	23.4629	3.15542	0	1	0	1	1	29130289		49.1962
Y	ON	0	97.4218	4.57905	0	1	0	1	1	29617261		22.0898
Y	ON	12.3466	18.9152	2.77613	0.727471	3	0	1.66667	2	29824060		10.4974
Y	ON	0	30.4599	3.41641	0	1	0	1	1	30518989		182.785
Y	ON	26.9692	39.8143	3.41943	0.811353	17	0.35119	3.58824	5	30611989		18.139
Y	ON	18.1467	41.9948	3.65733	0.520106	3	0	1.66667	2	30696559		52.5678
X	OFF	51.51	52.8062	3.53945	0.969912	33	0.602778	6.21212	11	31216577		63.8519
X	OFF	0	21.789	3.08141	0	1	0	1	1	31290975		136.076
X	OFF	42.7271	39.883	3.11335	1.18985	13	0.422222	3.30769	5	31377864		10.3446
X	OFF	158.918	97.0854	2.91492	2.41061	3	0	1.66667	2	32017545		22.6539
X	OFF	181.702	117.488	3.9266	1.4163	7	1	2.71429	4	32089762		127.501
X	OFF	0	34.1195	3.52987	0	1	0	1	1	32354629		162.828
X	OFF	0	35.3665	3.56576	0	1	0	1	1	33029750		61.9841
X	OFF	22.6302	20.549	2.43781	1.19328	9	0.65	3.22222	5	34544314		6.70312
X	OFF	0	163.202	5.09499	0	1	0	1	1	35281211		43.1245
X	OFF	34.5051	28.6156	2.80285	1.16364	5	1	2.2	3	36265886		43.8039
X	OFF	0	18.7495	2.93117	0	1	0	1	1	37142724		91.9846
X	OFF	0	60.8384	4.10822	0	1	0	1	1	38520455		36.1252
X	OFF	0	1.84472	0.612325	0	1	0	1	1	39049708		23.5243
X	OFF	0	8.57177	2.14847	0	1	0	1	1	39165061		46.9312
Y	ON	0	5.37197	1.68119	0	1	0	1	1	39230230		37.4016
Y	ON	0	30.333	3.41224	0	1	0	1	1	39769119		61.9171
Y	ON	20.3443	41.9754	3.641	0.494794	5	1	2.2	3	40011549		8.752
Y	ON	14.4798	28.6752	3.20437	0.656259	7	0	2.42857	3	40094567		124.192
Y	ON	29.2264	32.1038	3.06568	1.01335	7	0	2.42857	3	40255424		54.6512
Y	ON	0	37.4893	3.62406	0	1	0	1	1	41021583		62.9922
Y	ON	0	58.9857	4.0773	0	1	0	1	1	41023493		32.8732
Y	ON	0	11.9963	2.4846	0	1	0	1	1	41239018		211.979
Y	ON	0	44.9525	3.80561	0	1	0	1	1	41611953		37.9819
Y	ON	70.1494	59.3565	3.4581	1.19597	9	0.55	3	4	41943069		203.184
Y	ON	0	16.7096	2.81598	0	1	0	1	1	42049017		180.529
Y	ON	0	29.1488	3.37241	0	1	0	1	1	42051149		65.0044
Y	ON	49.8825	56.8542	3.39721	1.48638	7	0.444444	2.71429	4	42209842		24.7017
Y	ON	0	110.246	4.70272	0	1	0	1	1	42218690		10.3389
Y	ON	0	10.0503	2.3076	0	1	0	1	1	43470611		54.1296
Y	ON	17.8294	22.4161	2.91193	0.748176	3	0	1.66667	2	43486674		19.6853
Y	ON	0	53.8193	3.98563	0	1	0	1	1	43659438		32.13
Y	ON	89.7484	54.8602	3.24142	1.25587	47	0.53076	6.31915	11	44021529		17.3665
Y	ON	0	6.00177	1.79205	0	1	0	1	1	44251323		8.73256
Y	ON	43.3353	39.7186	3.17271	1.31708	3	0	1.66667	2	45292854		25.1073
Y	ON	0	11.3363	2.42801	0	1	0	1	1	46141771		18.2469
Y	ON	0	69.0083	4.23423	0	1	0	1	1	46186227		24.1823
Y	ON	0	14.401	2.6673	0	1	0	1	1	46876091		98.2095
Y	ON	120.902	131.265	4.13047	1.91384	3	0	1.66667	2	48513375		14.0902
Y	ON	57.5191	63.9915	3.43511	1.52479	10	0.711111	3.6	5	48704839		42.0294
Y	ON	0	7.98261	2.07727	0	1	0	1	1	49073673		31.2148
Y	ON	18.0586	25.3959	2.87247	1.10037	7	1	2.71429	4	49228283		25.8315
Y	ON	71.0635	90.7247	4.26215	0.900946	3	0	1.66667	2	49389310		25.6219
Y	ON	28.2325	90.4593	4.47213	0.314271	3	0	1.66667	2	49755957		35.4805
Y	ON	0	18.645	2.92558	0	1	0	1	1	49853664		30.9402
Y	ON	0	7.60916	2.02935	0	1	0	1	1	50035943		11.4467
Y	ON	56.0906	45.2215	3.09939	1.5871	3	0	1.66667	2	50379972		5.30286
Y	ON	70.6151	70.4106	3.90779	0.852604	7	1	2.71429	4	50589761		23.2242
Y	ON	27.6412	33.6024	3.16444	0.959557	15	0.493506	4.06667	6	50969898		29.2609
Y	ON	0	107.281	4.67546	0	1	0	1	1	51008180		16.1754
Y	ON	78.7603	69.439	3.8217	0.980627	5	1	2.2	3	51070110		2.70393
Y	ON	43.6182	32.6712	2.90669	1.15075	15	0.493506	4.06667	6	51106180		15.5068
Y	ON	0	13.1135	2.57364	0	1	0	1	1	51152932		4.47222
Y	ON	0	15.0323	2.7102	0	1	0	1	1	51414204		100.628
Y	ON	59.0992	65.0247	3.90851	0.871484	3	0	1.66667	2	51533422		129.341
Y	ON	34.6851	40.3384	3.21355	1.17248	17	0.570513	4.05882	6	52713713		54.0315
Y	ON	27.7481	44.4772	3.58232	0.78984	5	1	2.2	3	52766679		3.15381
Y	ON	0	21.9719	3.08977	0	1	0	1	1	53651652		16.687
Y	ON	0	23.8001	3.16969	0	1	0	1	1	53815615		6.07214
Y	ON	71.7338	88.7808	3.946	1.35949	9	0.333333	2.77778	4	54019127		11.9661
Y	ON	77.7292	70.7388	3.65907	1.28861	23	0.460606	4.3913	8	54673281		22.0964
Y	ON	0	20.7444	3.03227	0	1	0	1	1	55024671		19.3873
Y	ON	0	58.2642	4.06499	0	1	0	1	1	55177558		8.25783
Y	ON	0	67.4738	4.21174	0	1	0	1	1	55271219		40.7338
Y	ON	0	25.3824	3.23406	0	1	0	1	1	55917497		21.1165
Y	ON	17.4389	59.8764	4.06555	0.278843	3	0	1.66667	2	56069994		34.0037
Y	ON	21.0271	71.8361	4.24332	0.31162	3	0	1.66667	2	56402177		14.888
Y	ON	0	60.8852	4.10899	0	1	0	1	1	56529180		11.2447
Y	ON	20.4142	34.2978	3.37336	0.635511	7	1	2.71429	4	57784616		63.18
Y	ON	0	12.1591	2.49807	0	1	0	1	1	57827037		11.0646
Y	ON	59.4133	64.9738	3.61677	1.38712	11	0.5	3.18182	5	58519351		2.68024
Y	ON	0	14.242	2.6562	0	1	0	1	1	59698225		38.6088
Y	ON	23.4741	40.3472	3.49503	0.783817	5	1	2.2	3	60780697		82.6472
Y	ON	0	28.786	3.35989	0	1	0	1	1	60854094		21.0969
Y	ON	0	22.569	3.11658	0	1	0	1	1	61098314		38.6028
Y	ON	0	66.5561	4.19804	0	1	0	1	1	61143546		4.39846
Y	ON	0	13.3203	2.58929	0	1	0	1	1	61416918		33.7123
Y	ON	11.3256	90.0229	4.49458	0.12941	3	0	1.66667	2	63223480		29.1487
Y	ON	0	54.4073	3.9965	0	1	0	1	1	63353408		70.489
Y	ON	38.7867	63.9041	4.02322	0.56947	5	1	2.2	3	63644825		51.7841
Y	ON	0	31.2593	3.44232	0	1	0	1	1	63905825		12.0137
Y	ON	0	43.4292	3.77113	0	1	0	1	1	64222217		59.914
Y	ON	0	145.466	4.97994	0	1	0	1	1	64678902		42.109
Y	ON	20.0755	36.9948	3.46693	0.71647	3	0	1.66667	2	64991567		23.0158
Y	ON	0	16.2701	2.78933	0	1	0	1	1	65395514		49.8607
Y	ON	0	25.5426	3.24035	0	1	0	1	1	66559332		75.4363
Y	ON	0	131.545	4.87935	0	1	0	1	1	67068536		2.7698
Y	ON	0	8.25828	2.11122	0	1	0	1	1	67202761		45.2793
Y	ON	19.1342	28.3031	3.11608	0.725947	11	0.742857	3.72727	6	67581504		28.1375
Y	ON	0	42.3222	3.74531	0	1	0	1	1	68204850		22.2776
Y	ON	0	14.9232	2.70292	0	1	0	1	1	69250589		76.3102
Y	ON	97.091	93.4861	4.18979	0.882508	5	0.5	2.2	3	69643669		37.3915
Y	ON	0	23.1931	3.14385	0	1	0	1	1	69773317		4.70658
Y	ON	26.4555	30.3322	3.00559	1.05187	15	0.561905	3.66667	6	70269642		25.0051
Y	ON	0	86.4188	4.45921	0	1	0	1	1	70704707		16.8124
Y	ON	0	113.986	4.73607	0	1	0	1	1	70724938		15.6806
Y	ON	19.328	39.492	3.59484	0.495698	3	0	1.66667	2	71252640		113.485
Y	ON	0	92.2242	4.52422	0	1	0	1	1	71287717		39.8764
Y	ON	0	52.6778	3.96419	0	1	0	1	1	71424797		31.6536
Y	ON	28.6837	31.8173	3.12556	0.824414	37	0.494882	6.24324	10	71591642		22.0403
Y	ON	0	22.1662	3.09857	0	1	0	1	1	71822500		32.6255
Y	ON	19.8976	29.5753	3.2507	0.615934	3	0	1.66667	2	71907506		5.6153
Y	ON	0	31.1139	3.43766	0	1	0	1	1	72935833		93.8064
Y	ON	3.43802	26.4555	3.27005	0.126162	3	0	1.66667	2	74583439		21.6965
Y	ON	0	21.5283	3.06937	0	1	0	1	1	74705555		26.1734
Y	ON	0	249.854	5.52088	0	1	0	1	1	74992207		34.4645
Y	ON	38.6808	48.4631	3.44726	1.1355	7	0	2.42857	3	75373702		36.9663
Y	ON	0	13.1319	2.57505	0	1	0	1	1	75643291		103.335
Y	ON	61.1162	55.1973	3.71013	0.706578	11	0.352381	3.36364	5	75671207		14.9529
Y	ON	0	33.3518	3.50711	0	1	0	1	1	76147012		16.3858
Y	ON	0	52.2936	3.95687	0	1	0	1	1	76471620		9.36006
Y	ON	0	64.7985	4.17128	0	1	0	1	1	76499588		21.8771
Y	ON	14.0615	33.2531	3.43499	0.41641	5	0.5	2.2	3	77188537		12.0173
Y	ON	0	25.6974	3.24639	0	1	0	1	1	77423613		25.5402
Y	ON	0	12.2004	2.50147	0	1	0	1	1	78222886		88.2981
Y	ON	48.1101	45.8322	3.4098	1.14091	3	0	1.66667	2	78852997		45.4215
Y	ON	13.1223	16.3559	2.59476	0.74961	3	0	1.66667	2	79181220		3.56591
Y	ON	0	57.9489	4.05956	0	1	0	1	1	79206379		34.9248
Y	ON	0	67.3083	4.20928	0	1	0	1	1	80310049		7.11858
Y	ON	18.5508	26.4898	2.93992	1.00663	17	0.392857	3.70588	6	81068792		28.9725
Y	ON	0	30.061	3.40323	0	1	0	1	1	81542555		15.554
Y	ON	45.1142	117.072	4.70098	0.4533	3	0	1.66667	2	82136460		2.03784
Y	ON	0	23.6849	3.16484	0	1	0	1	1	82596790		40.655
Y	ON	0	212.757	5.36015	0	1	0	1	1	82978166		33.512
X	ON	0	20.5039	3.02061	0	1	0	1	1	83470330		19.2871
X	ON	44.8194	55.8028	3.55933	1.16051	23	0.369378	4.56522	6	84201246		141.34
X	ON	19.8873	40.7678	3.63591	0.450933	3	0	1.66667	2	85453438		76.2416
X	ON	0	50.6961	3.92585	0	1	0	1	1	86253945		29.8963
X	ON	16.629	22.2321	2.84146	0.778146	15	0.166667	3.53333	5	86402129		83.8952
X	ON	0	8.96189	2.19298	0	1	0	1	1	86500422		97.7328
X	ON	52.3465	36.5727	2.93481	1.10938	33	0.552163	5.18182	8	86628534		57.29
X	ON	0	40.7266	3.70688	0	1	0	1	1	86660263		59.5282
X	ON	0	5.49662	1.70413	0	1	0	1	1	87491980		191.583
X	ON	51.6075	56.9047	3.64433	0.95956	9	0.55	3	4	87533917		46.6472
X	ON	28.7766	47.6761	3.72368	0.614478	4	0	2.5	3	88028346		224.391
X	ON	0	82.2805	4.41013	0	1	0	1	1	88106039		12.8487
X	ON	18.8508	36.6519	3.50432	0.553335	3	0	1.66667	2	88484383		36.1102
X	ON	0	100.588	4.61103	0	1	0	1	1	88922271		8.46684
X	ON	0	24.4655	3.19726	0	1	0	1	1	89670888		21.1247
X	ON	49.9375	49.8758	3.40525	1.1047	13	0.533333	3.30769	5	90452186		92.0903
X	ON	26.0193	39.5296	3.54393	0.613554	3	0	1.66667	2	90478296		6.47942
X	ON	0	31.2347	3.44153	0	1	0	1	1	90928111		95.1594
X	ON	0	28.2711	3.34184	0	1	0	1	1	91654268		13.6486
X	ON	0	90.8216	4.5089	0	1	0	1	1	92270955		38.8873
X	ON	22.3626	38.1891	3.53468	0.557809	3	0	1.66667	2	92925483		90.4672
X	ON	0	5.22053	1.6526	0	1	0	1	1	94193334		83.3781
X	ON	0	11.0133	2.3991	0	1	0	1	1	94252040		137.446
X	ON	0	19.0262	2.94582	0	1	0	1	1	94444473		108.172
X	ON	21.0495	18.9923	2.34003	1.27366	9	0.583333	3.22222	5	94841064		8.88832
X	ON	29.4448	40.1519	3.52236	0.699238	3	0	1.66667	2	95463936		11.9299
X	ON	0	36.9873	3.61057	0	1	0	1	1	95842142		88.5086
X	ON	0	72.8313	4.28815	0	1	0	1	1	96000862		123.961
X	ON	24.5237	31.9749	3.1634	0.867189	17	0.505952	4.29412	7	96924287		124.813
X	ON	17.2359	35.007	3.48252	0.453538	3	0	1.66667	2	97365468		18.7923
X	ON	16.0058	23.1777	2.77709	1.0325	19	0.649573	5.63158	9	97395117		27.4149
X	ON	121.929	140.806	4.70423	0.837036	3	0	1.66667	2	98077527		22.7685
X	ON	0	8.41587	2.13012	0	1	0	1	1	98250629		27.7323
X	ON	23.3368	34.0889	3.28336	0.774753	13	0.766667	3.61538	6	98807366		56.7472
X	ON	70.1025	84.2926	3.91968	1.50666	3	0	1.66667	2	99004640		21.0107
X	ON	0	22.107	3.09589	0	1	0	1	1	99690064		18.8229
X	ON	43.2108	62.5347	3.77293	1.0587	9	0.55	3	4	100128922		17.2709
X	ON	0	27.8582	3.32713	0	1	0	1	1	100610033		30.2436
X	ON	0	8.48201	2.13795	0	1	0	1	1	100653077		15.7946
X	ON	0	74.0084	4.30418	0	1	0	1	1	100713511		227.21
X	ON	15.8847	31.6571	3.34837	0.598758	3	0	1.66667	2	100882074		10.8518
X	ON	0	27.8312	3.32616	0	1	0	1	1	100999759		38.9679
Y	ON	0	29.8301	3.39552	0	1	0	1	1	101371647		36.3787
Y	ON	0	8.54714	2.1456	0	1	0	1	1	101637659		18.7504
Y	ON	3.12114	12.5221	2.50802	0.237707	3	0	1.66667	2	101864910		60.1136
Y	ON	95.9137	91.4317	3.62121	2.1026	3	0	1.66667	2	101908541		285.8
Y	ON	0	101.355	4.61863	0	1	0	1	1	102065693		115.678
Y	ON	0	165.067	5.10635	0	1	0	1	1	102172482		10.9893
Y	ON	0	51.183	3.93541	0	1	0	1	1	102217592		135.969
Y	ON	30.194	32.5161	2.88864	1.46947	7	0.444444	2.71429	4	102515527		193.204
Y	ON	15.0837	54.2356	3.96879	0.267749	3	0	1.66667	2	102722548		77.4806
Y	ON	0	210.362	5.34883	0	1	0	1	1	102793263		27.7827
Y	ON	0	28.5473	3.35156	0	1	0	1	1	103610984		4.63311
Y	ON	0	70.8331	4.26033	0	1	0	1	1	103695136		70.8543
Y	ON	24.5356	27.924	2.88457	1.03245	69	0.588515	6.65217	12	104177014		41.7437
Y	ON	0	63.3187	4.14818	0	1	0	1	1	104428667		13.3644
Y	ON	0	9.6633	2.26833	0	1	0	1	1	104503546		78.0642
Y	ON	0	7.43202	2.0058	0	1	0	1	1	104765056		14.197
Y	ON	0	45.0637	3.80808	0	1	0	1	1	105787401		39.0056
Y	ON	0	16.9099	2.8279	0	1	0	1	1	106183399		139.653
Y	ON	0	13.852	2.62843	0	1	0	1	1	106195284		85.3998
Y	ON	0	30.3932	3.41422	0	1	0	1	1	106288269		49.5235
Y	ON	0	69.6809	4.24393	0	1	0	1	1	106389401		14.4026
Y	ON	0	10.0425	2.30682	0	1	0	1	1	106991665		4.15757
Y	ON	0	26.3229	3.27044	0	1	0	1	1	107250778		5.87814
Y	ON	36.8132	64.9514	4.03474	0.598062	5	1	2.2	3	107492631		48.5792
Y	ON	20.5246	30.1675	3.13327	0.850673	25	0.704944	5.32	8	107871678		95.7272
Y	ON	0	8.22409	2.10707	0	1	0	1	1	108594969		37.4459
Y	ON	0	87.4443	4.471	0	1	0	1	1	110501705		98.2567
Y	ON	0	91.5549	4.51694	0	1	0	1	1	111270892		84.1414
Y	ON	52.9103	70.7065	3.92378	0.979512	7	0	2.42857	3	111505363		143.333
Y	ON	48.5035	64.3682	3.78181	1.05625	11	0.742857	3.72727	6	111659090		166.255
Y	ON	0	47.5784	3.86238	0	1	0	1	1	111686214		77.165
Y	ON	0	66.8456	4.20238	0	1	0	1	1	112185850		24.9988
Y	ON	13.9874	33.4794	3.45784	0.388398	3	0	1.66667	2	112212003		7.78509
Y	ON	67.3917	73.0274	3.94072	1.08315	3	0	1.66667	2	112283296		68.0856
Y	ON	24.7784	62.7245	4.09125	0.367616	3	0	1.66667	2	112316382		54.5089
Y	ON	78.8331	61.9446	3.54004	1.29411	3	0	1.66667	2	113115930		8.40123
Y	ON	0	41.9444	3.73635	0	1	0	1	1	113133207		21.0775
Y	ON	0	2.8208	1.03702	0	1	0	1	1	113343683		54.5567
Y	ON	0	78.034	4.35714	0	1	0	1	1	113781934		16.7538
Y	ON	0	81.1088	4.39579	0	1	0	1	1	114045978		37.9302
Y	ON	0	17.1208	2.84029	0	1	0	1	1	114402539		51.116
Y	ON	26.2107	38.4907	3.47268	0.605056	13	0.583333	3.76923	6	114751627		6.74863
Y	ON	0	11.2335	2.4189	0	1	0	1	1	115695553		36.9811
Y	ON	0	50.1619	3.91526	0	1	0	1	1	117866464		39.3803
Y	ON	0	393.875	5.97603	0	1	0	1	1	119114523		16.3701
Y	ON	58.0983	47.7518	3.40837	0.989068	5	1	2.2	3	119365728		8.48784
Y	ON	0	13.8662	2.62945	0	1	0	1	1	119904483		50.929
X	OFF	0	5.9248	1.77915	0	1	0	1	1	120319807		15.9622
X	OFF	28.3688	40.7299	3.45789	0.739155	28	0.333827	4.71429	7	120768133		14.3573
X	OFF	0	32.215	3.47243	0	1	0	1	1	120884118		15.8454
X	OFF	11.3233	13.347	2.2561	1.09585	3	0	1.66667	2	121034545		60.4552
X	OFF	0	50.5926	3.9238	0	1	0	1	1	121444350		30.0977
X	OFF	0	40.4373	3.69975	0	1	0	1	1	121486142		111.441
X	OFF	0	212.487	5.35888	0	1	0	1	1	121766630		58.6246
X	OFF	28.9303	30.6839	3.04875	0.887645	13	0.462963	4.07692	6	122363840		55.3405
X	OFF	0	47.9626	3.87042	0	1	0	1	1	122931119		28.9411
X	OFF	0	42.8078	3.75672	0	1	0	1	1	123029593		11.1691
X	OFF	0	51.0782	3.93336	0	1	0	1	1	123170550		39.9687
X	OFF	0	25.6514	3.2446	0	1	0	1	1	123209501		47.1355
X	OFF	102.81	64.9329	3.4935	1.24263	23	0.603668	4.82609	8	123436798		23.6457
X	OFF	34.835	31.9201	2.9321	1.12841	7	0	2.42857	3	124800999		18.989
X	OFF	11.2222	14.8673	2.51559	0.637985	5	0.5	2.2	3	124949689		164.297
X	OFF	0	45.5843	3.81956	0	1	0	1	1	125051892		36.8886
X	OFF	0	90.3697	4.50391	0	1	0	1	1	125104849		28.0952
X	OFF	0	25.6576	3.24484	0	1	0	1	1	125489205		75.4669
X	OFF	27.5022	21.4063	2.46091	1.31407	3	0	1.66667	2	125547476		34.2952
X	OFF	45.8892	41.3685	3.33729	0.921682	5	1	2.2	3	125597255		16.2727
X	OFF	0	48.3279	3.87801	0	1	0	1	1	126029063		32.4286
X	OFF	0	28.4257	3.3473	0	1	0	1	1	127411702		10.0443
X	OFF	0	3.92422	1.36717	0	1	0	1	1	127938998		58.1526
X	OFF	0	116.666	4.75932	0	1	0	1	1	129429662		26.4978
X	OFF	0	440.469	6.08784	0	1	0	1	1	129714430		20.6841
X	OFF	0	4.09212	1.40906	0	1	0	1	1	130237788		7.6527
X	OFF	0	11.5441	2.44617	0	1	0	1	1	130251974		18.194
X	OFF	0	97.4667	4.57951	0	1	0	1	1	130321405		231.302
X	OFF	0	36.9221	3.60881	0	1	0	1	1	130599098		29.9861
X	OFF	18.4159	28.9466	3.15759	0.770834	5	1	2.2	3	132074812		42.0741
X	OFF	26.2281	23.5362	2.50266	1.40483	5	1	2.2	3	132389457		22.1022
X	OFF	0	10.0756	2.31012	0	1	0	1	1	132897830		41.5235
Y	ON	32.4568	39.548	3.40377	0.79728	19	0.564815	4.15789	7	132979747		12.6306
Y	ON	9.45705	23.9081	3.11727	0.422519	3	0	1.66667	2	133194218		11.9372
Y	ON	0	16.0967	2.77861	0	1	0	1	1	133358838		18.0052
Y	ON	0	42.3417	3.74577	0	1	0	1	1	134926326		35.6184
Y	ON	0	24.6589	3.20514	0	1	0	1	1	135351222		30.8031
Y	ON	0	45.057	3.80793	0	1	0	1	1	135357566		11.8415
Y	ON	0	39.9138	3.68672	0	1	0	1	1	136125592		12.6265
Y	ON	0	1.99374	0.690012	0	1	0	1	1	136255095		77.5054
Y	ON	47.3572	48.4154	3.31728	1.19078	27	0.508159	4.85185	7	136470270		214.721
Y	ON	0	70.677	4.25812	0	1	0	1	1	136665790		34.2643
Y	ON	23.0068	28.7436	3.05591	0.906486	7	1	2.71429	4	136912955		185.698
Y	ON	5.01234	28.6609	3.34465	0.183531	3	0	1.66667	2	137140156		108.768
Y	ON	30.9675	43.5781	3.40824	1.04287	9	0.333333	2.77778	4	137182691		157.381
Y	ON	0	27.7051	3.32161	0	1	0	1	1	137484508		62.2826
Y	ON	30.1534	54.1174	3.78164	0.842496	5	1	2.2	3	138143612		344.483
Y	ON	4.53401	11.9141	2.3946	0.501412	5	1	2.2	3	138243858		47.211
Y	ON	0	62.0571	4.12806	0	1	0	1	1	138925154		85.4984
Y	ON	69.6744	68.2293	3.46325	1.51133	7	0.444444	2.71429	4	140133999		186.134
X	OFF	58.9481	44.7922	3.15717	1.36117	3	0	1.66667	2	140152431		57.5115
X	OFF	15.5373	36.6975	3.49844	0.563816	5	1	2.2	3	141583257		159.877
X	OFF	0	64.0928	4.16033	0	1	0	1	1	141595443		64.8219
X	OFF	20.1326	38.5145	3.51473	0.61729	5	1	2.2	3	142015478		147.743
X	OFF	0	142.613	4.96014	0	1	0	1	1	142648512		67.561
X	OFF	0	21.7973	3.08179	0	1	0	1	1	143123754		6.87818
X	OFF	0	9.56893	2.25852	0	1	0	1	1	143878297		7.3526
X	OFF	13.6718	26.3332	3.12143	0.637002	7	0.444444	2.71429	4	144893887		71.0763
X	OFF	11.8211	21.6373	2.88934	0.723552	7	0	2.42857	3	145399675		87.7232
X	OFF	16.0922	30.0279	3.28129	0.493184	21	0.375556	4.2381	6	145631752		9.38657
X	OFF	29.1455	37.4112	3.29996	0.924782	9	0.65	3.22222	5	146411799		189.753
X	OFF	28.0885	42.7789	3.49518	0.880199	9	0.333333	2.77778	4	147210360		30.6218
X	OFF	0	9.01017	2.19835	0	1	0	1	1	147495100		58.23
X	OFF	22.5051	42.4045	3.62247	0.654435	3	0	1.66667	2	147612743		40.9825
X	OFF	0	76.9375	4.34299	0	1	0	1	1	148612097		9.0276
X	OFF	0	184.716	5.21882	0	1	0	1	1	149386718		44.5319
X	OFF	0	27.4855	3.31366	0	1	0	1	1	149419815		38.0104
X	OFF	0	19.7986	2.98561	0	1	0	1	1	150136133		23.4629
X	OFF	25.6949	34.0315	3.23564	0.823442	17	0.475427	4.41176	7	150847668		97.4218
X	OFF	0	43.4195	3.77091	0	1	0	1	1	151055174		17.2053
X	OFF	0	40.8041	3.70878	0	1	0	1	1	151840626		32.0276
X	OFF	0	44.1239	3.787	0	1	0	1	1	152195662		7.51261
Y	ON	0	97.4296	4.57913	0	1	0	1	1	152675769		30.4599
Y	ON	0	45.1821	3.8107	0	1	0	1	1	152814795		22.8334
Y	ON	23.6096	64.2705	4.1023	0.384979	7	0.444444	2.71429	4	153591163		8.60562
Y	ON	16.7653	26.4998	3.04816	0.935282	3	0	1.66667	2	154500768		34.2845
Y	ON	0	7.00996	1.94733	0	1	0	1	1	154702429		30.7411
Y	ON	0	43.8013	3.77966	0	1	0	1	1	155626775		95.6027
Y	ON	0	70.6149	4.25724	0	1	0	1	1	159453220		15.1131
Y	ON	5.81517	12.0966	2.40145	0.477994	5	1	2.2	3	159850375		84.6102
Y	ON	0	44.5639	3.79692	0	1	0	1	1	156054074		10.8728
Y	ON	0	2.71195	0.997669	0	1	0	1	1	156097395		5.98706
Y	ON	26.249	26.9541	2.79457	1.16956	9	0.583333	2.77778	4	156106911		73.1135
Y	ON	0	184.671	5.21858	0	1	0	1	1	156433524		22.795
Y	ON	47.8189	50.0911	3.56622	1.05357	3	0	1.66667	2	156513874		21.4584
Y	ON	111.061	83.949	3.72387	1.21891	11	0.628571	3.36364	5	156590718		50.9839
Y	ON	0	68.0521	4.22027	0	1	0	1	1	156745262		53.5637
Y	ON	0	34.4524	3.53958	0	1	0	1	1	157868517		36.7594
Y	ON	0	134.482	4.90143	0	1	0	1	1	158163541		49.9703
Y	ON	0	21.0182	3.04539	0	1	0	1	1	158825691		59.5478
Y	ON	32.4307	27.9425	2.89083	0.894724	17	0.714286	4.52941	8	159392335		55.3771
Y	ON	0	70.6149	4.25724	0	1	0	1	1	159453220		49.2675
Y	ON	5.81517	12.0966	2.40145	0.477994	5	1	2.2	3	159850375		21.3398
Y	ON	0	62.6329	4.13729	0	1	0	1	1	160321407		56.3751
Y	ON	40.1121	87.8081	4.40826	0.442714	3	0	1.66667	2	161781392		84.6755
Y	ON	46.9183	66.0648	3.85902	0.924997	21	0.531373	5	8	161832395		9.09764
Y	ON	0	27.4578	3.31265	0	1	0	1	1	162325959		20.3986
Y	ON	0	30.9473	3.43229	0	1	0	1	1	162551429		6.97046
Y	ON	0	100.315	4.60832	0	1	0	1	1	162732223		32.406
X	OFF	0	4.78755	1.56602	0	1	0	1	1	163119001		19.1641
X	OFF	32.2957	93.1513	4.49086	0.367842	3	0	1.66667	2	163174575		16.1814
X	OFF	25.852	28.6981	2.86817	1.12874	31	0.500617	5.96774	10	164877771		11.7815
X	OFF	0	45.5812	3.81949	0	1	0	1	1	165287618		62.3967
X	OFF	14.4674	39.1873	3.62563	0.35179	3	0	1.66667	2	165652860		81.224
X	OFF	0	9.44246	2.24522	0	1	0	1	1	166858679		115.977
X	OFF	0	13.648	2.61359	0	1	0	1	1	166868166		20.6176
X	OFF	0	41.1365	3.71689	0	1	0	1	1	167410572		252.571
X	OFF	0	49.4489	3.90094	0	1	0	1	1	167556996		19.9875
X	OFF	0	51.896	3.94924	0	1	0	1	1	168028977		149.419
X	OFF	0	53.6065	3.98167	0	1	0	1	1	168182736		59.9177
X	OFF	0	36.3285	3.5926	0	1	0	1	1	168334955		33.5712
X	OFF	0	8.77668	2.1721	0	1	0	1	1	169395742		9.09882
X	OFF	0	83.6852	4.42706	0	1	0	1	1	170406684		19.5466
X	OFF	0	43.6588	3.7764	0	1	0	1	1	170779098		64.0478
X	OFF	46.8441	55.7925	3.75282	0.758267	11	0.6	3	4	171177274		9.29756
X	OFF	0	70.4433	4.25481	0	1	0	1	1	171610448		51.1493
X	OFF	0	35.2875	3.56353	0	1	0	1	1	171887631		89.08
X	OFF	0	23.9149	3.1745	0	1	0	1	1	171951530		11.7159
X	OFF	0	27.0601	3.29806	0	1	0	1	1	172423251		94.6634
Y	ON	25.9649	38.816	3.44905	0.720658	11	0.628571	3.36364	5	172767094		114.605
Y	ON	0	47.9226	3.86959	0	1	0	1	1	173573653		47.9781
Y	ON	0	206.881	5.33214	0	1	0	1	1	174399034		63.5637
Y	ON	0	14.727	2.68968	0	1	0	1	1	174423655		9.63239
Y	ON	52.2978	51.5638	3.43711	1.08296	221	0.537822	8.8733	16	174429875		53.1664
Y	ON	0	33.3911	3.50829	0	1	0	1	1	174601561		42.6293
Y	ON	67.1121	57.1541	3.15861	1.9838	3	0	1.66667	2	174613773		9.70062
Y	ON	67.996	62.1336	3.61498	1.15323	5	0.5	2.2	3	175184918		21.789
Y	ON	0	82.9215	4.41789	0	1	0	1	1	175590260		3.83443
Y	ON	0	141.613	4.9531	0	1	0	1	1	176385468		84.2195
Y	ON	59.0341	70.0114	3.85234	1.10407	5	1	2.2	3	176430582		5.88835
Y	ON	17.5288	61.313	4.08987	0.276757	3	0	1.66667	2	176634893		61.2687
Y	ON	41.3124	53.8035	3.50429	1.46876	3	0	1.66667	2	177186501		25.1021
Y	ON	0	88.6386	4.48457	0	1	0	1	1	177802284		11.4205
Y	ON	0	11.8959	2.47619	0	1	0	1	1	177901332		39.766
Y	ON	0	30.3402	3.41247	0	1	0	1	1	177941064		66.0955
Y	ON	0	76.2511	4.33403	0	1	0	1	1	178276407		4.30022
Y	ON	53.8574	48.7837	3.57824	0.744245	13	0.7	3.30769	5	178348920		152.654
Y	ON	0	33.9857	3.52594	0	1	0	1	1	178563352		9.25068
												33.5439
												21.1355
												280.566
												2.85615
												7.83414
												113.294
												35.8442
												89.9869
												5.67441
												24.479
												520.38
												32.7548
												34.1195
												35.3665
												28.3023
												5.04361
												1.82892
												13.7657
												4.0446
												65.5853
												6.96359
												10.3752
												49.0322
												163.202
												14.6633
												4.89853
												6.69296
												28.8393
												87.9838
												18.7495
												60.8384
												1.84472
												8.57177
												5.37197
												30.333
												34.6748
												30.6191
												19.9751
												53.2822
												71.3257
												7.20103
												47.7601
												27.8151
												16.2669
												42.7233
												23.1843
												35.7757
												5.15727
												81.7542
												30.3742
												9.03198
												12.2481
												23.5443
												62.6163
												37.4893
												58.9857
												11.9963
												44.9525
												8.15296
												32
												59.2798
												35.6754
												20.8844
												11.0915
												173.096
												186.049
												7.98035
												16.7096
												29.1488
												76.5793
												5.69698
												2.97057
												139.529
												70.4601
												20.2301
												82.5132
												110.246
												10.0503
												13.957
												42.9004
												10.3907
												53.8193
												42.38
												49.0568
												49.0574
												86.0709
												124.199
												5.20195
												47.87
												4.11239
												42.6996
												16.7047
												2.31003
												77.8236
												10.5128
												50.8894
												54.5983
												5.65268
												11.412
												50.759
												39.7474
												19.9716
												3.87062
												46.5859
												2.39204
												48.3665
												26.2551
												26.7254
												3.84581
												10.8822
												15.7637
												15.6912
												124.86
												240.436
												542.29
												11.7405
												23.9834
												16.581
												189.81
												14.3278
												21.1327
												79.5111
												200.31
												3.11308
												40.012
												13.6391
												33.2471
												21.6205
												10.4063
												6.00177
												24.088
												88.7008
												6.36714
												11.3363
												69.0083
												14.401
												138.288
												248.502
												7.00496
												7.62473
												3.34326
												47.1061
												144.847
												69.3479
												3.50309
												142.044
												118.782
												90.4655
												12.8515
												7.98261
												44.4911
												2.09561
												51.8378
												9.55204
												18.7083
												30.7483
												20.3382
												167.808
												27.8188
												76.5469
												120.301
												86.9034
												64.1732
												18.645
												7.60916
												109.213
												4.56848
												21.8827
												50.9397
												18.9653
												110.75
												34.1134
												214.886
												25.9349
												37.2849
												4.1825
												37.0216
												26.4489
												95.0698
												26.1421
												12.8357
												22.5977
												2.99788
												27.1837
												40.0399
												53.058
												30.3043
												92.0913
												18.2607
												15.8013
												107.281
												207.985
												38.0363
												54.2253
												32.8168
												14.1315
												72.6112
												12.9346
												12.4491
												1.10022
												59.2151
												29.4409
												18.4825
												12.4351
												17.1344
												7.40749
												8.74183
												30.087
												18.4526
												15.6005
												173.976
												13.1135
												15.0323
												25.1446
												132.922
												37.0075
												43.3018
												55.7
												7.09982
												6.64724
												49.1313
												84.7696
												36.5487
												31.3785
												43.7552
												2.1039
												94.7136
												6.30836
												27.1161
												27.5247
												4.93159
												38.1712
												126.551
												78.3663
												11.8318
												62.57
												21.555
												48.0629
												21.9719
												23.8001
												146.026
												46.4978
												80.2644
												107.883
												4.11041
												215.141
												150.018
												40.7422
												8.34461
												94.7489
												32.6983
												144.222
												7.84021
												309.108
												85.4749
												31.7872
												18.4391
												16.1447
												73.4562
												50.8001
												73.8597
												39.9683
												176.396
												33.0565
												40.2742
												56.0862
												36.567
												1.19428
												238.155
												3.86591
												48.5659
												14.2849
												20.7444
												58.2642
												67.4738
												25.3824
												46.4726
												79.5925
												53.5642
												91.3091
												74.659
												49.5402
												60.8852
												26.9363
												69.292
												25.4603
												35.1564
												10.166
												19.947
												53.1264
												12.1591
												56.7201
												155.62
												22.1435
												101.95
												182.279
												36.8758
												82.5671
												33.1233
												24.632
												17.6071
												1.1943
												14.242
												51.3009
												20.0184
												62.7943
												10.5564
												57.0662
												28.786
												22.569
												66.5561
												13.3203
												99.6138
												92.9267
												77.5281
												54.4073
												61.5114
												127.959
												63.4405
												37.5438
												29.0652
												31.2593
												43.4292
												145.466
												14.0469
												51.3101
												45.6274
												16.2701
												25.5426
												131.545
												8.25828
												22.2228
												29.7183
												18.9607
												42.5764
												61.2899
												11.9179
												11.8546
												7.91236
												37.5266
												57.6088
												9.746
												42.3222
												14.9232
												37.2041
												83.9518
												27.0557
												262.785
												56.4337
												23.1931
												38.5509
												108.046
												1.77828
												26.2306
												9.1453
												5.77212
												13.4078
												7.25575
												39.5646
												39.1662
												45.1081
												46.8624
												12.0988
												31.2884
												30.7083
												86.4188
												113.986
												60.5047
												35.4987
												22.4726
												92.2242
												52.6778
												80.332
												100.686
												98.1719
												29.6249
												9.73782
												122.961
												59.6416
												18.1899
												6.71665
												65.5742
												21.0132
												26.2757
												44.868
												41.1023
												33.7207
												11.7259
												15.9815
												27.9678
												13.3431
												27.6559
												8.40759
												19.2151
												17.997
												8.82563
												36.984
												11.8296
												18.2664
												4.55277
												5.92536
												10.2905
												10.9115
												14.3689
												29.7389
												42.435
												41.5451
												23.8503
												16.806
												22.1662
												17.8466
												52.5494
												18.33
												31.1139
												30.3896
												24.0276
												24.9494
												21.5283
												249.854
												80.574
												105.807
												6.39509
												20.0484
												48.4028
												69.8438
												8.17056
												13.1319
												232.65
												43.1834
												20.7702
												74.3011
												20.0971
												25.7353
												32.179
												42.9499
												31.8565
												26.2284
												57.2193
												33.3518
												52.2936
												64.7985
												55.9562
												32.2932
												28.8486
												17.3438
												31.8239
												25.6974
												12.2004
												10.3905
												26.5058
												100.6
												31.4572
												9.88155
												7.72894
												57.9489
												67.3083
												53.2623
												13.1447
												50.1093
												10.8661
												34.3266
												36.4957
												16.9295
												18.3216
												10.7237
												1.15531
												22.868
												27.2678
												67.1753
												4.92136
												10.2435
												38.5142
												34.0022
												30.061
												137.863
												148.043
												65.3116
												23.6849
												212.757
												20.5039
												55.8817
												2.51223
												18.433
												140.783
												71.9872
												107.598
												38.956
												9.04362
												14.5018
												148.265
												84.952
												44.3253
												99.6544
												40.2896
												47.665
												132.473
												7.11462
												3.15477
												30.4919
												72.8435
												57.77
												39.2826
												15.4869
												27.9536
												63.6779
												30.6717
												50.6961
												25.4229
												5.41978
												23.8441
												25.9906
												70.1882
												26.3303
												33.0164
												22.8784
												34.6623
												7.85337
												10.4051
												13.5442
												22.6464
												4.91621
												6.36294
												8.96189
												61.7802
												68.8063
												101.488
												5.09015
												8.04721
												4.67384
												6.06708
												18.2978
												4.78503
												24.3257
												10.2939
												100.835
												25.2082
												263.761
												9.74624
												18.7212
												6.12391
												13.0144
												4.37537
												6.63542
												16.4015
												61.5813
												47.5248
												126.807
												14.0331
												23.8477
												13.9658
												11.8092
												9.62752
												80.1994
												6.18511
												22.6707
												10.1696
												40.7266
												5.49662
												55.3909
												19.0042
												108.243
												12.8032
												15.2652
												99.8628
												16.4128
												31.2485
												153.911
												56.1509
												84.7148
												23.3623
												26.4764
												82.2805
												56.2672
												35.0163
												18.6723
												100.588
												24.4655
												105.387
												66.9812
												25.9626
												26.0299
												8.8903
												97.602
												10.477
												60.2907
												7.64141
												173.271
												34.248
												26.1936
												5.41143
												21.7801
												69.3977
												27.4111
												31.2347
												28.2711
												90.8216
												63.5992
												29.4626
												21.5054
												5.22053
												11.0133
												19.0262
												8.70005
												6.306
												19.0516
												5.33234
												4.27758
												32.8838
												1.01115
												66.9904
												26.3776
												19.0845
												27.5744
												73.7966
												36.9873
												72.8313
												15.4582
												3.97635
												38.4628
												8.38466
												55.3791
												100.805
												30.1832
												65.8963
												27.7705
												5.29701
												42.0433
												35.4268
												20.522
												20.7282
												33.8134
												27.5754
												11.8511
												54.8966
												24.445
												25.6796
												20.0889
												3.4719
												7.65677
												3.41828
												18.3247
												38.144
												35.2807
												24.3822
												1.75695
												34.6372
												28.6134
												34.4332
												34.1231
												62.7645
												25.5618
												10.2211
												18.0766
												35.9848
												3.43612
												280.465
												86.4132
												55.5393
												8.41587
												81.5775
												21.9702
												47.8297
												21.9365
												57.6179
												21.5071
												8.17181
												6.12277
												20.4037
												34.081
												37.4479
												16.755
												67.7345
												9.00377
												96.1871
												147.687
												22.107
												7.79894
												136.482
												88.123
												62.8299
												100.809
												69.4752
												63.4069
												8.36081
												25.526
												27.8582
												8.48201
												74.0084
												45.925
												34.5054
												14.541
												27.8312
												29.8301
												8.54714
												16.0865
												11.2009
												10.2788
												77.0867
												193.71
												3.49852
												101.355
												165.067
												51.183
												5.69742
												38.6487
												1.14575
												32.858
												93.2052
												29.6947
												26.3627
												42.2988
												71.1881
												49.2199
												210.362
												28.5473
												70.8331
												91.1566
												58.5045
												11.79
												34.7657
												42.2075
												10.5214
												39.2553
												3.81754
												51.7635
												12.313
												54.1466
												4.2971
												2.35481
												59.4746
												56.386
												17.1252
												13.8678
												11.6237
												50.0023
												74.612
												3.02383
												22.9301
												7.58291
												8.14721
												12.2949
												14.3047
												8.94861
												22.6094
												9.64325
												17.9684
												55.5412
												6.62674
												33.5342
												28.1681
												7.46752
												3.92356
												9.85155
												87.7867
												1.85538
												10.584
												65.0164
												16.2062
												14.1704
												32.1063
												71.3255
												33.6771
												21.9716
												22.2484
												15.985
												59.7867
												62.5684
												2.58503
												13.9636
												19.321
												41.7411
												17.7233
												2.89321
												12.9346
												97.0288
												1.97002
												51.5584
												10.0375
												25.0287
												6.36726
												34.2048
												6.15457
												21.6755
												11.8819
												61.8468
												63.3187
												9.6633
												7.43202
												45.0637
												16.9099
												13.852
												30.3932
												69.6809
												10.0425
												26.3229
												52.4972
												28.6282
												107.037
												35.4889
												101.106
												29.8319
												14.9942
												12.9016
												5.65114
												6.26894
												83.1087
												77.6925
												37.7992
												24.0938
												34.3473
												9.92028
												31.9464
												54.3141
												27.164
												19.8941
												20.0884
												2.06482
												14.4226
												44.5438
												42.4477
												39.3618
												42.1159
												16.7118
												20.8255
												41.6778
												8.22409
												87.4443
												91.5549
												145.404
												28.9867
												9.39394
												113.655
												47.9302
												115.536
												34.0393
												46.6464
												152.159
												4.85582
												77.7754
												111.476
												14.8949
												78.5104
												17.7791
												52.0695
												122.454
												29.4299
												47.5784
												66.8456
												26.5063
												24.3493
												49.5826
												16.9722
												147.799
												54.3109
												50.144
												91.2693
												46.7602
												18.0296
												152.955
												14.8494
												41.9444
												2.8208
												78.034
												81.1088
												17.1208
												12.2611
												33.7328
												105.08
												22.9142
												30.5239
												76.6576
												15.0768
												51.1653
												32.7373
												20.7788
												22.478
												34.996
												41.9779
												11.2335
												50.1619
												393.875
												38.0635
												11.7912
												150.218
												20.0952
												18.5908
												13.8662
												5.9248
												32.7058
												21.0905
												14.4908
												24.4285
												30.5871
												24.2299
												22.788
												68.1142
												88.2058
												67.6968
												30.6909
												61.6799
												94.2696
												80.8484
												47.2984
												10.5871
												17.628
												12.0608
												22.3662
												99.9041
												35.0521
												78.7688
												11.1202
												17.4952
												58.3857
												7.76649
												19.732
												40.4448
												32.215
												2.9211
												25.3931
												11.7267
												50.5926
												40.4373
												212.487
												57.1737
												65.7969
												14.1873
												7.10237
												49.4051
												20.5964
												9.52265
												7.94257
												8.33431
												100.779
												17.8358
												14.5482
												25.6662
												47.9626
												42.8078
												51.0782
												25.6514
												42.5795
												20.1713
												18.4245
												43.3396
												43.3352
												494.507
												9.45999
												38.8381
												76.9667
												14.6284
												15.0832
												6.07246
												59.4531
												72.7055
												58.1077
												58.1094
												7.99331
												23.5737
												48.1695
												1.16931
												62.0788
												208.106
												70.5845
												7.92803
												93.0339
												69.4533
												22.2866
												4.06022
												14.3701
												12.3085
												8.63055
												8.18846
												7.56657
												15.9591
												33.992
												45.5843
												90.3697
												25.6576
												53.1558
												4.94149
												6.12171
												122.222
												16.3033
												28.4331
												10.6635
												29.2205
												48.3279
												28.4257
												3.92422
												116.666
												440.469
												4.09212
												11.5441
												97.4667
												36.9221
												32.0573
												53.9841
												36.6997
												8.21462
												13.7774
												33.5124
												65.048
												11.3352
												5.92963
												1.85589
												10.0756
												58.4137
												51.296
												26.8299
												36.0314
												18.2631
												13.7938
												3.77048
												43.0401
												12.7092
												17.4716
												23.0768
												24.0765
												56.8849
												150.236
												40.0971
												26.021
												53.5301
												71.3362
												24.5337
												33.32
												14.4066
												23.9978
												16.0967
												42.3417
												24.6589
												45.057
												39.9138
												1.99374
												80.6832
												33.4333
												103.779
												164.043
												69.4681
												68.3267
												141.394
												134.576
												20.2661
												7.47574
												50.1317
												17.4035
												13.4142
												13.3779
												5.98641
												6.08024
												6.88035
												8.21495
												20.8867
												76.963
												1.58616
												115.954
												23.7169
												24.237
												43.025
												43.6722
												12.2414
												70.677
												31.4069
												74.9987
												24.9853
												20.6389
												34.147
												4.44257
												10.5857
												23.0455
												30.2547
												32.6826
												70.5074
												6.10032
												92.527
												64.9756
												37.8811
												15.9697
												6.11501
												34.4016
												63.7254
												27.7051
												10.4691
												59.3607
												61.918
												93.6589
												45.1805
												4.6221
												12.839
												12.1596
												17.1432
												12.8066
												62.0571
												25.3196
												3.97058
												133.26
												6.9528
												17.4593
												126.494
												164.149
												112.852
												9.88499
												11.6396
												50.2272
												34.4838
												50.9308
												35.0741
												12.7715
												64.0928
												61.9914
												14.2216
												40.5676
												22.4851
												53.3069
												142.613
												21.7973
												9.56893
												11.2461
												35.1661
												28.7437
												48.0903
												27.4211
												8.0297
												25.635
												37.7927
												21.6625
												6.42607
												6.5915
												31.1122
												27.0458
												20.8303
												21.1062
												41.8137
												17.8114
												27.1028
												33.8456
												73.3919
												18.1703
												11.8624
												53.1912
												20.1309
												16.6781
												21.7467
												36.2996
												51.484
												19.6466
												21.5481
												51.6154
												13.0326
												33.6723
												26.0212
												20.4142
												36.8626
												41.8381
												17.7087
												98.8566
												5.26774
												57.1259
												20.2155
												9.83523
												48.9901
												4.88133
												99.9245
												32.2847
												46.1234
												61.9923
												16.3312
												33.5713
												57.7126
												32.1892
												9.01017
												47.2342
												17.8766
												62.1026
												76.9375
												184.716
												27.4855
												19.7986
												11.8371
												63.9868
												80.4282
												26.6012
												17.6804
												54.3606
												91.7431
												8.52063
												31.7836
												40.0809
												5.81921
												25.492
												9.281
												11.2907
												43.8798
												34.6133
												21.1374
												43.4195
												40.8041
												44.1239
												97.4296
												45.1821
												104.888
												46.972
												71.3034
												31.6087
												55.2414
												61.7724
												78.1084
												36.9063
												7.15957
												35.4336
												7.00996
												43.8013
												44.5639
												2.71195
												38.9166
												34.0196
												17.3166
												35.9282
												2.8054
												15.1157
												3.07156
												9.03757
												86.3759
												184.671
												33.6484
												103.962
												12.6629
												101.339
												14.7174
												12.7266
												234.627
												25.6208
												11.7066
												13.0516
												352.822
												77.7981
												22.9794
												56.0496
												68.0521
												34.4524
												134.482
												21.0182
												131.046
												9.11035
												73.6231
												7.48727
												16.9815
												7.18683
												10.2686
												9.28053
												8.09453
												11.4077
												35.9589
												45.6371
												12.1287
												41.2539
												10.8323
												34.595
												10.1298
												70.6149
												6.09469
												15.3121
												9.11719
												9.34905
												20.6099
												62.6329
												75.289
												132.687
												55.4486
												72.8406
												12.6158
												12.8609
												100.904
												178.578
												40.1743
												100.357
												81.3969
												105.751
												112.496
												94.4159
												80.6285
												24.3009
												47.4542
												89.7007
												13.2676
												22.983
												7.5058
												38.1854
												129.859
												21.0854
												27.4578
												30.9473
												100.315
												4.78755
												60.1836
												94.5402
												124.73
												64.8673
												2.49227
												2.03902
												33.5176
												28.7268
												104.989
												16.4132
												38.4967
												7.70511
												2.30432
												84.0686
												3.73739
												18.1994
												41.7989
												37.6959
												78.9094
												5.16941
												33.6216
												21.9851
												43.3479
												28.9234
												39.0017
												12.4055
												29.0457
												7.8282
												22.7579
												11.5524
												3.1433
												16.851
												4.89039
												43.1567
												45.5812
												55.5622
												33.8637
												28.1359
												9.44246
												13.648
												41.1365
												49.4489
												51.896
												53.6065
												36.3285
												8.77668
												83.6852
												43.6588
												37.4183
												54.7714
												173.651
												40.2576
												15.1668
												104.767
												66.6868
												47.5584
												17.4639
												38.5341
												17.4419
												70.4433
												35.2875
												23.9149
												27.0601
												50.1431
												49.2043
												33.3341
												11.0149
												36.7067
												104.421
												46.1012
												7.98611
												21.1701
												36.7221
												30.1718
												47.9226
												206.881
												14.727
												14.3129
												71.5997
												97.6958
												48.9903
												38.8217
												46.4009
												53.0538
												80.5938
												18.0129
												7.7323
												11.8274
												65.9886
												45.5131
												118.265
												6.8717
												10.0777
												34.0984
												183.921
												40.1899
												78.4208
												18.0812
												30.0211
												20.4501
												5.07017
												92.6716
												61.0216
												20.0175
												12.8007
												44.9286
												151.839
												31
												28.958
												27.3098
												8.34298
												22.0866
												35.1621
												51.6675
												70.1228
												140.906
												74.1945
												48.5801
												84.284
												11.5215
												43.4822
												18.8267
												12.2562
												7.25477
												8.57961
												50.8903
												43.9501
												45.0222
												45.8437
												116.471
												71.9612
												8.45309
												34.3015
												54.6669
												4.62862
												24.0028
												10.6128
												5.12239
												62.8905
												44.3823
												32.6048
												4.65668
												35.3461
												22.3749
												4.26372
												15.1746
												32.2176
												18.0319
												32.3291
												43.156
												19.1968
												7.32271
												36.1606
												8.91766
												11.3991
												15.9358
												3.97958
												115.131
												2.7355
												12.56
												18.7575
												22.2205
												19.4752
												4.18937
												131.564
												3.32403
												14.3869
												1.72151
												13.9193
												208.587
												158.371
												64.4644
												6.22979
												7.18815
												54.284
												215.326
												91.7672
												35.1196
												5.90338
												63.8664
												169.133
												152.319
												20.3506
												129.652
												71.0938
												67.646
												20.1174
												9.48798
												87.9255
												244.68
												8.08313
												5.61967
												57.5066
												298.278
												94.9242
												46.3454
												30.1951
												6.03411
												81.6144
												37.4306
												24.0312
												78.0927
												74.0759
												51.3176
												49.5468
												201.593
												72.8347
												85.0047
												40.1782
												42.2719
												31.4045
												94.2646
												240.94
												45.2624
												115.146
												30.6708
												13.798
												152.023
												34.5613
												118.641
												88.5358
												18.7524
												11.1814
												5.29742
												37.6593
												37.1763
												70.6005
												32.68
												27.6454
												6.4086
												43.5927
												56.825
												21.9405
												94.2512
												73.3634
												10.0079
												3.58002
												28.6116
												52.3378
												44.989
												9.08375
												31.5948
												79.2579
												20.7725
												19.6781
												87.9088
												66.9303
												33.7133
												27.8186
												172.919
												3.60739
												17.0045
												178.255
												236.986
												17.815
												139.985
												10.6443
												8.44441
												85.5282
												7.0764
												96.1972
												108.943
												39.9883
												27.2087
												3.73447
												14.8024
												4.77783
												27.3906
												4.13267
												24.0462
												7.14415
												142.689
												15.7223
												88.3101
[truncated: 64 more rows]

## Sheet: Floret Generator with Retr.
								Floret Generator with Retraction
					For every generated solution, you will find the data saved in out/TheTimeStampedResults/Optimized Parameters/gen_distributions.mat
					Individual statistics								Segment-Lengths
Std of segment length	Mean of segment length	Mean of fitted distribution	Std of fitted distribution	Number of branches	Asymmetry	Average depth of florets	Maximal depth of florets				e.g. plot with		1.27798
0	7.50101	2.01504	0	1	0	1	1				hist(lengths,100) or		1.36796
40.5502	42.8685	3.33652	0.979612	21	0.45873	3.95238	6				use the hist function		1.42037
26.3442	72.2393	4.23004	0.398472	3	0	1.66667	2				of our code		1.50832
0	19.3953	2.96503	0	1	0	1	1						1.51146
153.686	136.424	4.28818	1.53243	3	0	1.66667	2						1.52114
21.1594	37.184	3.45778	0.631263	7	1	2.71429	4						1.91093
14.5531	31.0429	3.23123	0.875902	5	1	2.2	3						1.92774
61.8859	92.2284	4.26072	0.899245	5	1	2.2	3						2.00927
0	32.2336	3.47301	0	1	0	1	1						2.02647
0	18.0285	2.89195	0	1	0	1	1						2.11288
0	7.98092	2.07705	0	1	0	1	1						2.19394
28.7373	31.2196	3.01759	1.05986	7	0.444444	2.71429	4						2.21608
28.3987	46.8935	3.60969	0.802275	19	0.555556	4.15789	7						2.22974
21.9707	21.1452	2.68774	0.871897	7	0.666667	2.71429	4						2.26607
25.1599	25.5842	2.8494	0.907279	25	0.571068	4.68	8						2.28663
30.2186	47.7269	3.62665	0.791008	9	0.333333	2.77778	4						2.29146
8.46204	68.7521	4.22565	0.119482	3	0	1.66667	2						2.31176
41.1958	53.6484	3.75523	0.857322	3	0	1.66667	2						2.31751
0	3.61462	1.28499	0	1	0	1	1						2.35664
39.4609	46.9329	3.63432	0.635338	9	0.65	3.22222	5						2.36931
0	20.7481	3.03245	0	1	0	1	1						2.39077
0	14.0334	2.64144	0	1	0	1	1						2.43021
38.1669	52.0309	3.65839	1.05681	3	0	1.66667	2						2.55203
23.3282	25.3794	2.86125	1.14049	3	0	1.66667	2						2.55655
0	29.9756	3.40038	0	1	0	1	1						2.61435
0	16.4809	2.8022	0	1	0	1	1						2.62585
43.861	47.5278	3.42335	1.11984	9	0.65	3.22222	5						2.75768
39.763	53.8785	3.69701	0.877089	9	0.333333	2.77778	4						2.78042
0	91.6958	4.51848	0	1	0	1	1						2.83778
0	59.8019	4.09104	0	1	0	1	1						2.88396
0	21.2246	3.05516	0	1	0	1	1						2.90798
0	71.1233	4.26441	0	1	0	1	1						2.92869
0	42.7129	3.7545	0	1	0	1	1						2.94607
27.3144	49.2709	3.6729	0.817976	11	0.4	3	4						2.97254
23.541	19.7403	2.58157	0.89353	5	0.5	2.2	3						2.98599
31.3038	39.5489	3.368	0.85305	39	0.474854	5.41026	8						3.00798
18.8658	34.4111	3.06786	1.52626	5	0.5	2.2	3						3.01913
0	105.559	4.65927	0	1	0	1	1						3.07508
0	208.606	5.34045	0	1	0	1	1						3.10421
0	37.0242	3.61157	0	1	0	1	1						3.14496
0	14.8626	2.69885	0	1	0	1	1						3.15281
3.23701	70.9124	4.26075	0.045694	3	0	1.66667	2						3.23902
42.9166	49.611	3.44431	1.18963	13	0.266667	3.46154	5						3.28451
0	225.645	5.41896	0	1	0	1	1						3.30481
0	76.1263	4.33239	0	1	0	1	1						3.36647
41.5195	46.3883	3.48863	0.896602	9	0.583333	3.22222	5						3.3736
10.199	28.3048	3.30093	0.307112	5	1	2.2	3						3.39236
55.6777	49.2408	3.25242	1.31787	7	1	2.71429	4						3.42808
20.7701	34.9662	3.26358	0.989407	9	0.333333	2.77778	4						3.43117
0	2.08352	0.734059	0	1	0	1	1						3.45858
45.2608	61.1185	3.81701	1.05912	3	0	1.66667	2						3.46367
18.7866	39.1202	3.55573	0.501997	11	0.352381	3.36364	5						3.46484
23.6962	38.8662	3.45103	0.709458	21	0.584759	4.80952	8						3.47381
49.1768	73.2209	4.05274	0.791964	7	0.444444	2.71429	4						3.48156
35.8288	59.7553	3.81157	1.00601	5	1	2.2	3						3.53017
0	89.2765	4.49174	0	1	0	1	1						3.57699
0	70.5008	4.25562	0	1	0	1	1						3.63607
55.3998	50.9259	3.54203	1.04128	3	0	1.66667	2						3.7101
0	24.3441	3.19229	0	1	0	1	1						3.80409
46.7558	52.2842	3.55678	1.03597	9	0.583333	3.22222	5						3.82507
0	11.2315	2.41873	0	1	0	1	1						3.8683
0	177.749	5.18037	0	1	0	1	1						3.87071
36.6356	50.1725	3.68002	0.715364	19	0.453704	3.84211	6						3.91855
33.6378	44.5519	3.52163	0.84977	15	0.831169	4.73333	8						3.94115
23.1989	30.6417	3.12541	0.851967	11	0.5	3.18182	5						4.02501
59.8999	58.6039	3.64628	0.990058	9	0.583333	3.22222	5						4.02769
34.4159	38.8864	3.24959	1.01267	17	0.241071	3.58824	5						4.04591
83.1014	74.0057	3.91961	0.906304	5	1	2.2	3						4.05018
0	18.2148	2.90223	0	1	0	1	1						4.05813
32.8281	45.3871	3.59616	0.677132	15	0.52381	3.53333	5						4.07074
34.1091	56.3573	3.85105	0.638786	13	0.666667	3.61538	5						4.07898
28.3401	34.8963	3.2254	0.902401	11	0.72	3.72727	6						4.10344
0	55.8573	4.0228	0	1	0	1	1						4.13621
38.7711	45.7441	3.49043	0.867589	11	0.742857	3.72727	6						4.15169
19.9281	25.7403	3.04593	0.776725	3	0	1.66667	2						4.15814
35.9621	49.7408	3.53918	1.24094	3	0	1.66667	2						4.25978
26.2292	44.331	3.4183	1.2678	7	0.444444	2.71429	4						4.29111
25.4335	30.4531	3.08305	0.85942	31	0.471053	4.93548	8						4.34567
0	31.7825	3.45892	0	1	0	1	1						4.35774
0	130.385	4.87049	0	1	0	1	1						4.38298
0	152.183	5.02508	0	1	0	1	1						4.45503
0	17.2408	2.84728	0	1	0	1	1						4.50002
0	31.6525	3.45482	0	1	0	1	1						4.50885
89.4455	45.9505	2.46098	1.62888	5	1	2.2	3						4.54407
40.1729	52.5692	3.76332	0.641917	9	0.55	3	4						4.54561
42.5178	57.7044	3.86007	0.686467	5	1	2.2	3						4.56205
31.3285	46.5206	3.65478	0.647469	7	0	2.42857	3						4.5693
114.564	83.6392	3.59323	1.6548	3	0	1.66667	2						4.57776
0	26.1787	3.26495	0	1	0	1	1						4.59598
0	24.0232	3.17902	0	1	0	1	1						4.61418
67.1125	66.0551	3.863	0.776308	13	0.6	3.61538	6						4.66259
47.8728	39.0701	2.98155	1.54781	3	0	1.66667	2						4.66628
0	21.2263	3.05524	0	1	0	1	1						4.67438
0	45.9521	3.8276	0	1	0	1	1						4.68007
30.9292	33.2045	3.16065	0.900144	9	0.65	3.22222	5						4.73929
0	172.615	5.15106	0	1	0	1	1						4.79998
0	8.32255	2.11897	0	1	0	1	1						4.80151
0	3.63235	1.28988	0	1	0	1	1						4.83137
60.8852	57.7564	3.47365	1.24838	5	1	2.2	3						4.85251
111.064	73.7388	3.26516	1.78099	3	0	1.66667	2						4.85688
37.2706	55.231	3.81114	0.723007	5	1	2.2	3						4.92595
0	6.85283	1.92466	0	1	0	1	1						4.94106
0	118.671	4.77635	0	1	0	1	1						4.95274
0	37.2364	3.61729	0	1	0	1	1						4.97763
94.4289	84.5876	3.83425	1.20615	7	0.444444	2.71429	4						4.98858
39.4934	43.506	3.41376	0.932441	15	0.452381	3.66667	6						4.99516
22.4336	36.5212	3.4409	0.582145	9	0.65	3.22222	5						5.09303
0	136.991	4.91992	0	1	0	1	1						5.10774
37.7001	47.126	3.28649	1.62854	3	0	1.66667	2						5.12816
39.6019	54.009	3.67183	0.946939	7	1	2.71429	4						5.14438
64.7412	74.8367	4.00549	1.02122	3	0	1.66667	2						5.19907
36.1393	41.6623	3.28235	1.12459	9	0.583333	2.77778	4						5.29603
0	1.13108	0.123177	0	1	0	1	1						5.35431
21.0502	34.9895	3.38331	0.686962	5	1	2.2	3						5.37349
61.6675	63.3416	3.84244	0.820296	5	1	2.2	3						5.40547
0	144.108	4.97056	0	1	0	1	1						5.41646
0	126.187	4.83776	0	1	0	1	1						5.43024
29.6071	44.5122	3.55375	0.768864	15	0.380952	3.53333	5						5.45055
27.4014	35.0191	3.3251	0.72483	13	0.666667	3.61538	5						5.46357
0	82.0251	4.40703	0	1	0	1	1						5.49887
37.0415	38.5301	3.13791	1.22509	5	1	2.2	3						5.51523
44.8166	36.3696	2.95538	1.30099	11	0.5	3.18182	5						5.54323
14.1456	24.3096	2.98677	0.709987	15	0.619048	3.66667	6						5.55087
31.9635	37.2073	3.3187	0.790984	13	0.766667	4.23077	7						5.57983
0	70.7143	4.25865	0	1	0	1	1						5.62995
8.27698	57.8578	4.05133	0.140527	3	0	1.66667	2						5.74503
0	72.7961	4.28766	0	1	0	1	1						5.79348
51.2581	48.792	3.30559	1.27362	7	1	2.71429	4						5.79389
0	69.704	4.24426	0	1	0	1	1						5.80087
41.7188	41.4879	3.2419	1.15306	15	0.616883	4.33333	7						5.86254
0	70.7146	4.25865	0	1	0	1	1						5.87074
22.2067	66.4622	4.15928	0.334994	3	0	1.66667	2						5.88503
32.1234	83.3572	4.36081	0.455895	3	0	1.66667	2						5.91864
31.745	36.7726	3.25569	0.910834	21	0.471111	3.95238	6						5.95115
0	45.415	3.81584	0	1	0	1	1						6.0105
0	5.62111	1.72653	0	1	0	1	1						6.03294
20.6723	27.2734	2.94185	1.21559	3	0	1.66667	2						6.03679
0	157.753	5.06103	0	1	0	1	1						6.10319
0	66.5917	4.19858	0	1	0	1	1						6.12998
28.9609	40.7546	3.41035	0.888424	9	0.65	3.22222	5						6.19046
0	4.4073	1.48326	0	1	0	1	1						6.21051
0	94.3067	4.54655	0	1	0	1	1						6.25673
0	36.1606	3.58797	0	1	0	1	1						6.32118
40.6823	41.7916	3.17021	1.22337	25	0.556061	4.44	7						6.32855
51.736	49.4624	3.25258	1.64055	3	0	1.66667	2						6.36558
37.1953	43.2253	3.33675	1.05966	9	0.65	3.22222	5						6.44617
0	96.2527	4.56698	0	1	0	1	1						6.48391
13.2679	24.3116	3.09353	0.470667	5	1	2.2	3						6.49158
0	128.285	4.85425	0	1	0	1	1						6.56601
43.8161	51.5913	3.71494	0.805073	3	0	1.66667	2						6.57067
33.6568	49.6907	3.72436	0.670856	5	1	2.2	3						6.58429
0	5.1616	1.64125	0	1	0	1	1						6.58953
0	117.946	4.77023	0	1	0	1	1						6.63336
29.62	45.8757	3.47222	1.11022	9	0.55	3	4						6.66217
39.3466	41.1499	3.24976	1.10177	15	0.380952	3.4	5						6.68223
47.8182	39.8426	3.13347	1.18457	5	0.5	2.2	3						6.68423
0	114.973	4.74469	0	1	0	1	1						6.74998
0	3.79479	1.33363	0	1	0	1	1						6.75425
32.7362	43.1326	3.3288	1.13998	17	0.534615	4.05882	6						6.77683
0	33.9358	3.52447	0	1	0	1	1						6.79087
29.0847	35.9413	3.1817	1.02682	17	0.517857	3.70588	5						6.852
16.6575	27.2692	3.13866	0.60367	15	0.52381	3.4	5						6.8539
30.8551	46.334	3.45881	1.0751	11	0.64	3.54545	5						6.87524
0	9.68893	2.27098	0	1	0	1	1						6.89772
42.618	56.7133	3.69682	0.965764	7	0.444444	2.71429	4						6.91624
34.0761	32.3539	2.86887	1.24149	11	0.342857	3.54545	5						6.95838
25.7714	40.821	3.53559	0.626531	9	0.65	3.22222	5						6.97193
28.6154	38.4559	3.42299	0.71054	9	0.333333	2.77778	4						6.9739
20.4128	23.5754	2.80117	0.9528	7	1	2.71429	4						7.00595
64.088	68.9409	3.77228	1.09176	7	0	2.42857	3						7.00927
19.1242	37.8235	3.4711	0.683654	13	0.785714	4.23077	7						7.0914
94.013	68.875	3.39146	1.67579	3	0	1.66667	2						7.09938
0	51.5176	3.94192	0	1	0	1	1						7.10441
35.978	41.8093	3.22673	1.2117	19	0.662698	4.15789	7						7.17049
22.4147	29.9287	3.09239	0.958395	5	1	2.2	3						7.17536
24.8101	56.3423	3.94761	0.532506	3	0	1.66667	2						7.20806
28.358	40.5195	3.40965	0.955042	7	1	2.71429	4						7.28314
19.4869	26.8661	3.02979	0.772951	17	0.330952	3.82353	6						7.28414
0	106.778	4.67075	0	1	0	1	1						7.29558
42.5902	47.3606	3.59117	0.879998	3	0	1.66667	2						7.36738
41.3475	45.2503	3.35834	1.15766	5	0.5	2.2	3						7.39092
33.9377	34.894	3.07087	1.11132	21	0.471111	4.90476	8						7.50606
26.6211	35.4704	3.18566	1.02834	17	0.428571	3.94118	6						7.52592
0	24.0728	3.18108	0	1	0	1	1						7.53697
26.951	37.2034	3.28529	0.997974	7	0.666667	2.71429	4						7.55849
23.934	39.028	3.50184	0.621101	7	1	2.71429	4						7.58979
34.9429	36.0189	3.28703	0.908124	3	0	1.66667	2						7.59158
10.9888	20.9097	2.92996	0.521628	5	0.5	2.2	3						7.60211
25.0932	72.7152	4.23046	0.360917	9	0.333333	2.77778	4						7.64188
27.0503	43.5001	3.61901	0.588164	13	0.462963	4.07692	6						7.65537
40.054	48.6696	3.65709	0.822896	3	0	1.66667	2						7.66894
30.54	28.1575	2.74967	1.20936	13	0.690476	3.92308	6						7.72049
41.7183	35.0707	3.14999	0.884229	19	0.677778	4.05263	7						7.74559
27.9526	32.1909	3.08491	0.97495	19	0.437037	3.84211	6						7.80849
0	20.3229	3.01175	0	1	0	1	1						7.85628
0	23.931	3.17517	0	1	0	1	1						7.89982
0	65.9227	4.18848	0	1	0	1	1						7.98215
50.153	57.701	3.67905	0.967864	13	0.7	3.30769	5						7.98411
20.569	38.1033	3.43751	0.754219	11	0.742857	3.72727	6						8.00829
0	39.7896	3.68361	0	1	0	1	1						8.01263
38.2105	49.073	3.602	0.861356	7	0.444444	2.71429	4						8.04924
0	59.8838	4.09241	0	1	0	1	1						8.10357
30.7965	43.0582	3.51478	0.781151	9	0.55	3	4						8.12759
45.6939	53.8504	3.11566	2.18485	3	0	1.66667	2						8.14427
0	19.962	2.99383	0	1	0	1	1						8.17568
37.5202	36.7697	3.10273	1.06617	11	0.5	3.18182	5						8.18488
21.0857	22.1846	2.61408	1.3736	3	0	1.66667	2						8.18692
0	82.7695	4.41606	0	1	0	1	1						8.2695
135.295	94.8956	3.56349	1.49519	7	1	2.71429	4						8.31069
0	98.1561	4.58656	0	1	0	1	1						8.31716
50.1922	47.4277	3.36906	1.14678	7	0	2.42857	3						8.37855
35.2055	35.8539	2.94989	1.32723	23	0.703896	4.30435	7						8.40272
17.6865	26.6259	2.88433	1.14724	9	0.583333	2.77778	4						8.4157
0	108.151	4.68353	0	1	0	1	1						8.42092
26.227	30.7235	3.02321	1.12411	5	1	2.2	3						8.42707
28.2983	41.0735	3.51293	0.728771	5	1	2.2	3						8.44232
30.6842	51.8672	3.75401	0.70014	11	0.342857	3.54545	5						8.47177
0	15.2376	2.72377	0	1	0	1	1						8.5379
29.2524	46.4755	3.56499	0.95299	7	1	2.71429	4						8.55898
30.3967	40.0336	3.31358	1.09427	9	0.65	3.22222	5						8.59643
0	56.2507	4.02982	0	1	0	1	1						8.6375
0	142.659	4.96046	0	1	0	1	1						8.64132
34.2695	45.4801	3.56094	0.775957	9	0.65	3.22222	5						8.64289
33.6537	67.414	4.09714	0.559925	5	0.5	2.2	3						8.65197
31.2348	56.4126	3.9302	0.554139	3	0	1.66667	2						8.65599
0	23.6003	3.16126	0	1	0	1	1						8.71132
0	4.67127	1.54143	0	1	0	1	1						8.75458
76.9391	81.7039	3.97782	1.24726	3	0	1.66667	2						8.76888
43.2065	46.7003	3.43572	0.967469	13	0.322222	3.30769	5						8.80492
37.8313	46.834	3.47812	0.939096	13	0.785714	4.23077	7						8.81988
42.7969	58.338	3.89799	0.691957	3	0	1.66667	2						8.84565
0	49.1079	3.89402	0	1	0	1	1						8.87997
31.3781	50.5992	3.67189	0.837264	13	0.796296	4.23077	7						8.89398
0	13.6186	2.61143	0	1	0	1	1						8.89684
77.756	61.1468	3.53532	1.21254	9	0.65	3.22222	5						8.89874
0	57.6052	4.05361	0	1	0	1	1						8.91229
26.4772	32.8384	3.24958	0.87575	3	0	1.66667	2						8.96964
0	171.072	5.14208	0	1	0	1	1						8.97625
44.7249	45.7951	3.41952	0.923016	17	0.470238	3.82353	6						9.02376
80.6081	79.0144	3.7287	1.32589	13	0.533333	3.61538	6						9.02414
0	85.0701	4.44348	0	1	0	1	1						9.05661
0	60.7249	4.10635	0	1	0	1	1						9.05841
19.3686	42.9896	3.6618	0.469265	15	0.52381	3.4	5						9.06438
0	5.34131	1.67547	0	1	0	1	1						9.08175
27.8255	41.0299	3.49201	0.894175	3	0	1.66667	2						9.19579
50.6906	47.1841	3.48064	0.877851	9	0.65	3.22222	5						9.24288
47.0259	45.0391	3.129	1.42933	15	0.380952	3.93333	6						9.24933
0	70.3102	4.25292	0	1	0	1	1						9.29914
0	119.798	4.78581	0	1	0	1	1						9.32968
42.0684	41.5581	3.28428	0.985318	29	0.415418	4.86207	7						9.3657
30.2817	35.9248	3.21152	1.01904	7	0	2.42857	3						9.43921
0	92.5226	4.52745	0	1	0	1	1						9.45129
													9.45175
													9.45679
													9.4734
													9.48435
													9.48467
													9.49222
													9.53155
													9.53247
													9.53366
													9.59349
													9.59757
													9.60034
													9.62268
													9.68864
													9.68953
													9.692
													9.69646
													9.7031
													9.7048
													9.7051
													9.73807
													9.75719
													9.79024
													9.82191
													9.84174
													9.90336
													9.91198
													9.91589
													9.9225
													9.9313
													9.93863
													9.96271
													10.0098
													10.0102
													10.0158
													10.0345
													10.0417
													10.0555
													10.0573
													10.0629
													10.0712
													10.0789
													10.0891
													10.0971
													10.1344
													10.1399
													10.1427
													10.15
													10.1709
													10.1754
													10.1803
													10.2284
													10.2523
													10.2561
													10.2999
													10.3239
													10.3261
													10.3605
													10.369
													10.3992
													10.4186
													10.4761
													10.5532
													10.5598
													10.5608
													10.5638
													10.5676
													10.6042
													10.634
													10.6501
													10.688
													10.6956
													10.6958
													10.7663
													10.7825
													10.7899
													10.8721
													10.8894
													10.9284
													10.9326
													10.934
													10.9363
													10.9404
													10.9542
													10.9883
													11.0156
													11.0992
													11.1064
													11.1426
													11.1973
													11.2011
													11.2033
													11.2832
													11.2854
													11.3
													11.3375
													11.3513
													11.4166
													11.4186
													11.4435
													11.5523
													11.5654
													11.5714
													11.576
													11.6015
													11.61
													11.639
													11.6605
													11.7092
													11.7239
													11.7637
													11.7751
													11.7932
													11.8009
													11.8295
													11.8757
													11.888
													11.8959
													11.9114
													11.913
													11.9318
													11.9617
													11.9671
													11.976
													11.992
													12.0095
													12.0529
													12.0785
													12.1385
													12.167
													12.1798
													12.2046
													12.2159
													12.2242
													12.2379
													12.2864
													12.3052
													12.4147
													12.5392
													12.5662
													12.5711
													12.6209
													12.6232
													12.6669
													12.6802
													12.7015
													12.7018
													12.7031
													12.7056
													12.72
													12.7219
													12.7465
													12.7944
													12.849
													12.8517
													12.9442
													12.9582
													12.9684
													12.9739
													12.9891
													13.0082
													13.0173
													13.0206
													13.033
													13.075
													13.0789
													13.099
													13.0993
													13.1134
													13.1143
													13.1422
													13.1449
													13.1774
													13.2223
													13.2859
													13.3074
													13.326
													13.3821
													13.4466
													13.4537
													13.5203
													13.5439
													13.548
													13.5575
													13.5599
													13.6477
													13.6683
													13.6718
													13.686
													13.7127
													13.7407
													13.7467
													13.7549
													13.8168
													13.8356
													13.8401
													13.841
													13.887
													13.8957
													13.9211
													13.954
													13.9833
													13.9878
													14.0178
													14.0287
													14.0345
													14.057
													14.0605
													14.0818
													14.1068
													14.1238
													14.197
													14.218
													14.2188
													14.2728
													14.2897
													14.2934
													14.3682
													14.3828
													14.3961
													14.3983
													14.402
													14.4091
													14.4432
													14.4866
													14.5129
													14.5332
													14.5385
													14.5592
													14.5802
													14.5913
													14.6078
													14.6165
													14.6342
													14.6501
													14.7435
													14.7658
													14.7839
													14.7936
													14.8344
													14.8476
													14.9311
													14.9444
													14.9516
													14.966
													15.016
													15.0198
													15.0472
													15.0795
													15.1184
													15.1708
													15.1886
													15.1939
													15.1988
													15.326
													15.4405
													15.4524
													15.4822
													15.5016
													15.5096
													15.5267
													15.5464
													15.5681
													15.575
													15.5955
													15.6022
													15.6088
													15.6201
													15.6215
													15.6404
													15.661
													15.6728
													15.7738
													15.8055
													15.8265
													15.8536
													15.867
													15.8885
													16.0007
													16.0259
													16.0355
													16.1224
													16.1471
													16.1542
													16.1812
													16.1957
													16.2
													16.239
													16.2515
													16.252
													16.2588
													16.269
													16.2706
													16.3797
													16.4072
													16.4108
													16.4539
													16.4779
													16.4812
													16.5407
													16.5814
													16.6112
													16.6558
													16.7697
													16.8166
													16.8784
													16.8935
													16.9203
													16.925
													16.9442
													16.9746
													16.9818
													16.993
													17.0615
													17.2077
													17.2739
													17.4308
													17.4514
													17.4579
													17.5313
													17.5883
													17.5907
													17.6125
													17.6167
													17.6184
													17.6277
													17.7061
													17.7129
													17.7504
													17.7661
													17.7925
													17.8136
													17.831
													17.844
													17.8632
													17.8755
													17.9064
													17.9136
													18.0681
													18.0812
													18.1331
													18.1618
													18.1849
													18.1924
													18.197
													18.2787
													18.2893
													18.3546
													18.39
													18.4577
													18.5505
													18.5562
													18.5799
													18.6142
													18.647
													18.6787
													18.7627
													18.7849
													18.8029
													18.8738
													18.9884
													19.1669
													19.1704
													19.2716
													19.2856
													19.3656
													19.3727
													19.3953
													19.4639
													19.4669
													19.4749
													19.4909
													19.5099
													19.5162
													19.5202
													19.5829
													19.5983
													19.6027
													19.6472
													19.664
													19.6649
													19.7015
													19.7141
													19.7215
													19.7309
													19.77
													19.889
													19.9526
													19.9559
													19.9587
													19.9711
													20.0934
													20.1943
													20.2093
													20.2095
													20.2364
													20.2388
													20.2735
													20.2943
													20.3495
													20.4246
													20.452
													20.513
													20.5296
													20.5606
													20.5723
													20.598
													20.7474
													20.7654
													20.7734
													20.8105
													20.817
													20.8308
													20.8514
													20.8619
													20.9226
													20.9267
													20.947
													20.9544
													20.985
													20.9977
													21.0014
													21.0054
													21.0305
													21.0708
													21.0931
													21.115
													21.1379
													21.1976
													21.2223
													21.2327
													21.241
													21.2548
													21.269
													21.328
													21.3755
													21.3759
													21.3795
													21.3887
													21.4506
													21.5176
													21.5853
													21.6102
													21.6142
													21.6569
													21.6575
													21.6602
													21.6637
													21.6925
													21.7037
													21.7276
													21.7726
													21.7923
													21.8316
													21.864
													21.9452
													21.9956
													21.9986
													22.0136
													22.0218
													22.0336
													22.0403
													22.095
													22.1037
													22.1269
													22.1821
													22.2148
													22.2728
													22.2777
													22.3563
													22.4212
													22.4216
													22.4789
													22.6522
													22.6697
													22.7193
													22.9117
													22.9973
													23.0289
													23.044
													23.0798
													23.1513
													23.1614
													23.2254
													23.2502
													23.264
													23.2827
													23.2887
													23.3353
													23.3898
													23.4283
													23.4423
													23.5096
													23.5119
													23.5954
													23.6268
													23.6562
													23.6978
													23.7769
													23.7839
													23.8449
													23.9145
													23.9492
													23.984
													23.9972
													24.052
													24.0531
													24.0704
													24.0735
													24.1306
													24.141
													24.1606
													24.3235
													24.3357
													24.3387
													24.3813
													24.4228
													24.5063
													24.5547
													24.5852
													24.5974
													24.7178
													24.7346
													24.8839
													24.9299
													24.9999
													25.0097
													25.0346
													25.0662
													25.1042
													25.1084
													25.1143
													25.1229
													25.1867
													25.2405
													25.2918
													25.3116
													25.3608
													25.3905
													25.4349
													25.4436
													25.4561
													25.4596
													25.4704
													25.5802
													25.5831
													25.6221
													25.6309
													25.6618
													25.6693
													25.7255
													25.7298
													25.8211
													25.8418
													25.921
													25.9579
													26.0125
													26.0192
													26.0271
													26.0348
													26.0719
													26.0877
													26.1339
													26.1414
													26.1433
													26.1475
													26.1505
													26.1579
													26.1747
													26.2019
													26.2231
													26.2369
													26.2424
													26.2706
													26.2778
													26.278
													26.294
													26.3304
													26.3615
													26.4083
													26.4085
													26.4456
													26.4549
													26.502
													26.542
													26.5709
													26.5792
													26.6237
													26.6554
													26.7149
													26.7208
													26.7363
													26.739
													26.7763
													26.7802
													26.8155
													26.8435
													26.8897
													26.9116
													26.9159
													26.9623
													26.9839
													27.0043
													27.0134
													27.0836
													27.1388
													27.1777
													27.2789
													27.3027
													27.3087
													27.3297
													27.3562
													27.3648
													27.3655
													27.3819
													27.4762
													27.4804
													27.4913
													27.4921
													27.5159
													27.5378
													27.5427
													27.5959
													27.6294
													27.6516
													27.6588
													27.6722
													27.731
													27.7607
													27.7772
													27.8052
													27.8159
													27.838
													27.8696
													27.8963
													27.9128
													27.9973
													27.998
													28.038
													28.0667
													28.0955
													28.1356
													28.1851
													28.2246
													28.2479
													28.3889
													28.4437
													28.5219
													28.5274
													28.603
													28.603
													28.6053
													28.6168
													28.6383
													28.6535
													28.6667
													28.6724
													28.7077
													28.7775
													28.7834
													28.7865
													28.8131
													28.8492
													28.8528
													28.8619
													28.8632
													28.867
													28.867
													28.9078
													28.9205
													28.962
													29.0118
													29.036
													29.0859
													29.1483
													29.169
													29.2823
													29.2824
													29.3313
													29.332
													29.351
													29.4556
													29.5262
													29.5751
													29.6157
													29.629
													29.6442
													29.6503
													29.6791
													29.6821
													29.7266
													29.7872
													29.8973
													29.9519
													29.956
													29.9583
													29.9964
													30.0622
													30.1476
													30.1604
													30.1876
													30.1917
													30.2515
													30.2556
													30.295
													30.3586
													30.3809
													30.4249
													30.5292
													30.6173
													30.6373
													30.6511
													30.8325
													30.8417
													30.8605
													30.887
													30.954
													30.969
													30.9722
													31.0442
													31.0709
													31.2296
													31.3456
													31.5078
													31.5186
													31.5571
													31.5757
													31.6561
													31.6749
													31.7213
													31.7303
													31.8002
													31.8033
													31.9349
													31.9764
													32.0134
													32.0218
													32.0752
													32.0907
													32.1031
													32.1069
													32.1156
													32.1296
													32.1395
													32.1487
													32.228
													32.2666
													32.3014
													32.3439
													32.3837
													32.4057
													32.4713
													32.5396
													32.6035
													32.6564
													32.6928
													32.6981
													32.7319
													32.7842
													32.8599
													32.9092
													33.033
													33.0332
													33.0389
													33.1516
													33.2066
													33.2991
													33.3699
													33.374
													33.4518
													33.5245
													33.5301
													33.5641
													33.5982
													33.6558
													33.7835
													33.8021
													33.8021
													33.8802
													33.8993
													33.8995
													33.9
													33.9098
													33.9685
													33.998
													34.1751
													34.2054
													34.2061
													34.2175
													34.2235
													34.2663
													34.285
													34.2883
													34.3041
													34.3067
													34.4312
													34.5197
													34.5325
													34.5418
													34.5525
													34.5749
													34.5973
													34.6041
													34.7023
													34.7285
													34.7314
													34.8097
													34.8157
													34.8294
													34.8491
													35.0093
													35.0769
													35.0916
													35.1401
													35.1566
													35.2502
													35.3282
													35.3786
													35.4966
													35.5095
													35.574
													35.5906
													35.601
													35.7296
													35.7398
													35.8175
													35.8766
													35.9009
													36.0372
													36.0912
													36.1059
													36.229
													36.3033
													36.3065
													36.3079
													36.3081
													36.3421
													36.3772
													36.3934
													36.4213
													36.4337
													36.4907
													36.5215
													36.5287
													36.6003
													36.6044
													36.643
													36.7334
													36.77
													36.7769
													36.9654
													36.9839
													36.9893
													37.0035
													37.0082
													37.036
													37.0784
													37.147
													37.2255
													37.2566
													37.3319
													37.3809
													37.4866
													37.608
													37.6258
													37.6507
													37.6627
													37.7343
													37.8163
													37.8263
													37.8876
													37.9584
													38.056
													38.0564
													38.1314
													38.1366
													38.2126
													38.323
													38.3238
													38.3847
													38.4543
													38.5006
													38.5058
													38.6292
													38.6552
													38.6947
													38.6956
													38.7327
													38.8006
													38.8238
													38.8672
													38.8791
													38.9083
													38.9231
													39.0174
													39.0218
													39.0321
													39.1398
													39.1813
													39.2624
													39.2714
													39.2975
													39.3252
													39.3384
													39.3691
													39.3865
													39.4237
													39.4307
													39.4417
													39.515
													39.6782
													39.6887
													39.7643
													39.7942
													39.8329
													39.8767
													39.8787
													39.9528
													39.9942
													40.0284
													40.0872
													40.15
													40.1515
													40.3657
													40.3867
													40.4623
													40.4988
													40.538
													40.5405
													40.6044
													40.6808
													40.6892
													40.7388
													40.8055
													40.8516
													40.8619
													40.8792
													41.0014
													41.0433
													41.2992
													41.3354
													41.3586
													41.3694
													41.4407
													41.4666
													41.485
													41.5026
													41.594
													41.7026
													41.7589
													41.8168
													41.8513
													41.8586
													41.8776
													41.8819
													41.8828
													41.9125
													41.9977
													42.0321
													42.0957
													42.2784
													42.3196
													42.4066
													42.4964
													42.4968
													42.5245
													42.5825
													42.6095
													42.6273
													42.6423
													42.7003
													42.7027
													42.762
													42.8107
													42.8186
													42.9054
													42.9301
													43.0321
													43.0817
													43.1282
													43.1449
													43.1921
													43.2216
													43.262
													43.3425
													43.3638
													43.3794
													43.4591
													43.4894
													43.5018
													43.5192
													43.542
													43.5568
													43.5922
													43.6069
													43.6126
													43.7764
													43.9778
													43.9927
													44.0285
													44.0414
													44.0751
													44.1621
													44.1972
													44.338
													44.3671
													44.5071
													44.5993
													44.6313
													44.6666
													44.7068
													44.779
													44.7832
													44.7913
													44.7942
													44.8269
													44.8585
													44.8835
													44.8909
													44.9092
													44.9276
													44.9314
													44.9847
													45.0036
													45.0803
													45.115
													45.1975
													45.2625
													45.2631
													45.5118
													45.5427
													45.5571
													45.6366
													45.6529
													45.68
													45.7157
													45.7302
													45.8304
													46.0312
													46.2258
													46.2344
													46.312
													46.3355
													46.369
													46.3801
													46.4454
													46.4536
													46.4616
													46.4958
													46.538
													46.5605
													46.7059
													46.7945
													46.7964
													46.8169
													46.9058
													47.1624
													47.1697
													47.2125
													47.3005
													47.369
													47.5189
													47.5336
													47.5897
													47.6228
													47.7164
													47.7337
													47.8204
													47.8811
													47.9071
													47.9407
													47.9833
													48.0935
													48.096
													48.1675
													48.1981
													48.3156
													48.4321
													48.4791
													48.8403
													48.9905
													48.9968
													49.049
													49.0857
													49.2033
													49.207
													49.2666
													49.3744
													49.4269
													49.5131
													49.6077
													49.6325
													49.6721
													49.7148
													49.7968
													49.8046
													49.8058
													49.9493
													50.0041
													50.0115
													50.076
													50.2497
													50.31
													50.343
													50.3654
													50.3939
													50.4911
													50.6878
													50.7432
													51.0026
													51.1466
													51.1613
													51.1634
													51.1877
													51.1887
													51.1994
													51.2528
													51.3876
													51.4003
													51.4217
													51.4314
													51.4342
													51.5311
													51.5434
													51.5829
													51.7539
													51.7779
													51.7797
													51.8953
													51.9049
													51.9123
													51.9221
													51.9772
													52.0731
													52.0805
													52.1618
													52.1625
													52.2771
													52.3304
													52.3337
													52.3341
													52.3982
													52.5679
													52.5835
													53.1399
													53.3087
													53.3643
													53.4458
													53.4654
													53.4759
													53.5961
													53.6837
													53.743
													53.7564
													53.7582
													53.8162
													53.857
													54.0142
													54.0259
													54.0598
													54.1312
													54.3223
													54.3765
													54.4001
													54.4189
													54.9019
													54.9654
													54.9679
													55.0078
													55.1926
													55.204
													55.267
													55.2716
													55.3043
													55.5034
													55.536
													55.6884
													55.7079
													55.7501
													55.84
													55.8423
													55.8462
													55.849
													55.9092
													56.0895
													56.0998
													56.1246
													56.1633
													56.2122
													56.2319
													56.2367
													56.2584
													56.4453
													56.4485
													56.5515
													56.6416
													56.7947
													57.0103
													57.0225
													57.0578
													57.0753
													57.1126
													57.5508
													57.565
													57.5938
													57.6439
													57.9448
													58.0489
													58.057
													58.1647
													58.2012
													58.3122
													58.582
													58.7081
													58.7502
													58.8025
													58.8211
													58.8372
													58.9585
													58.9595
													59.2111
													59.316
													59.3202
													59.3295
													59.6193
													59.704
													59.7761
													59.8731
													60.0516
													60.1841
													60.2275
													60.2403
													60.2875
													60.3379
													60.3634
													60.3926
													60.4574
													60.571
													60.5795
													60.6417
													60.7442
													60.8686
													61.1644
													61.2414
													61.4359
													61.4591
													61.4812
													61.4978
													61.5966
													61.7587
													61.7953
													61.8907
													61.9209
													62.1252
													62.1505
													62.175
													62.2041
													62.2429
													62.2465
													62.4407
													62.4751
													62.4925
													62.6261
													62.6349
													62.6981
													62.7469
													62.7784
													62.8352
													62.9472
													63.0886
													63.0963
													63.1095
													63.1488
													63.2834
													63.3027
													63.3516
													63.3654
													63.4128
													63.5952
													63.7058
													63.781
													63.7857
													63.888
													63.931
													63.9586
													63.9606
													64.0547
													64.096
													64.2291
													64.2597
													64.3658
													64.9018
													64.9319
													64.9533
													65.0002
													65.0113
													65.0427
													65.2205
													65.3116
													65.3144
													65.3407
													65.3897
													65.4952
													65.757
													65.7582
													65.8471
													66.1141
													66.1164
													66.2115
													66.6413
													66.668
													66.8537
													66.9202
													66.9611
													66.9723
													67.011
													67.1315
													67.4169
													67.4232
													67.4877
													67.5835
													67.7178
													67.7674
													67.9103
													68.1257
													68.155
													68.2218
													68.2225
													68.3308
													68.4892
													68.5715
													68.6662
													68.7157
													68.9123
													68.9668
													69.3202
													69.3377
													69.5321
													69.6188
													69.7011
													69.8113
													69.829
													69.8931
													70.089
													70.1762
													70.2184
													70.3724
													70.48
													70.5837
													70.597
													70.6127
													70.6614
													70.7016
													70.7642
													70.8734
													70.8734
													70.9548
													70.9591
													71.4224
													71.5339
													71.6856
													71.7272
													71.8451
													71.9008
													71.9175
													72.0076
													72.0475
													72.1273
													72.2799
													72.5107
													72.7408
													72.8301
													72.8657
													72.8735
													72.8745
													73.0613
													73.0889
													73.4933
													73.4968
													73.5716
													73.5928
													73.6118
													73.623
													73.6595
													73.661
													74.2953
													74.3409
													74.4867
													74.578
													74.7303
													74.9061
													75.0032
													75.0167
													75.1604
													75.1628
													75.2842
													75.4388
													75.4528
													75.5806
													75.622
													75.8177
													75.8718
													76.073
													76.0936
													76.6945
													76.7174
													76.8011
													76.8594
													77.2787
													77.348
													77.4115
													77.469
													77.6293
													77.8483
													77.8871
													78.3453
													78.4728
													78.5325
													78.5637
													78.5668
													78.5914
													78.695
													78.8204
													79.347
													79.5035
													79.7819
													79.8504
													80.3187
													80.3332
													80.5988
													80.6976
													81.0808
													81.2252
													81.2804
													81.4608
													81.6239
													81.9993
													82.0846
													82.256
													82.6052
													82.6158
													82.669
													83.0217
													83.181
													83.5203
													83.6726
													83.6737
													83.8058
													83.8928
													83.9368
													84.0495
													84.5532
													84.736
													84.8613
													85.096
													85.1808
													85.1903
													85.3238
													85.5358
													85.6413
													85.9221
													85.9434
													86.1473
													86.5028
													86.6213
													86.6508
													86.6552
													87.0082
													87.1192
													87.1879
													87.3377
													87.4132
													87.5673
													88.1053
													88.2163
													88.3877
													88.394
													88.5443
													88.5962
													88.6042
													88.6892
													88.7679
													88.8228
													88.9835
													89.2019
													89.394
													89.5212
													89.5505
													89.8852
													90
													90.1693
													90.189
													90.2123
													90.6874
													91.1128
													91.1772
													91.4568
													91.5029
													91.6572
													91.6691
													91.6707
													92.0733
													92.3729
													92.6433
													93.0232
													93.1182
													93.4199
													93.6612
													93.7851
													94.0428
													94.2417
													94.262
													94.5738
													94.7675
													94.8011
													94.8103
													94.9151
													95.161
													95.7155
													95.766
													96.0602
													96.0891
													96.3174
													96.4613
													97.0116
													97.3199
													97.4208
													97.7065
													97.8682
													97.9591
													98.051
													98.2597
													98.3141
													98.4271
													98.5464
													99.1105
													99.483
													99.7425
													100.178
													100.264
													100.957
													100.97
													101.198
													101.554
													101.587
													101.853
													102.69
													102.694
													102.997
													103.045
													103.054
													103.377
													103.516
													103.944
													104.342
													104.429
													105.659
													106.073
													106.492
													106.756
													107.039
													107.187
													107.606
													107.824
													108.176
													108.616
													108.832
													108.953
													109.679
													110.241
													110.369
													110.502
													110.503
													110.92
													111.131
													111.737
													111.902
													112.024
													112.086
													112.431
													112.557
													112.927
													112.962
													113.498
													113.807
													114.123
													114.426
													114.857
													115.235
													115.316
													115.503
													116.526
													116.553
													117.361
													117.416
													117.473
													118.057
													118.176
													118.677
													119.657
													119.814
													119.966
													120.135
													120.695
													121.407
													122.422
													122.481
													122.646
													122.947
													122.992
													123.927
													124.069
													124.222
													124.311
													124.535
													125.014
													125.12
													126.191
													126.207
													126.622
													127.738
													127.824
													128.024
													128.324
													128.457
													129.537
													129.881
													130.846
													131.151
													131.402
													131.759
													132.573
													132.998
													133.642
													133.977
													133.985
													134.19
													134.304
													134.309
													134.536
													134.767
													134.995
													136.674
													136.769
													137.491
													137.813
													138.429
													138.541
													138.781
													138.994
													139.032
													139.482
													139.674
													139.676
													140.233
													140.399
													140.59
													141.134
													141.232
													141.312
													142.803
													142.812
													143.362
													143.445
													143.564
													144.834
													147.461
													147.63
													148.047
													148.251
													148.313
													150.006
													150.436
													150.882
													153.414
													154.187
													154.895
													155.454
													156.968
													157.207
													157.21
													157.458
													157.498
													157.513
													157.728
													158.691
													158.803
													164.248
													164.333
													165.757
													165.774
													167.603
													169.33
													170.266
													171.421
													172.193
													172.585
													174.211
													174.623
													175.959
													176.694
													179.242
													179.481
													180.604
													182.315
													182.517
													187.488
													189.719
													191.33
													191.336
													191.813
													193.3
													194.737
													200.955
													204.422
													205.205
													206.433
													206.644
													213.468
													216.204
													217.254
													221.091
													223.501
													224.397
													229.243
													230.561
													235.184
													236.035
													239.77
													246.363
													249.783
													258.933
													266.326
													310.747
													332.845

## Sheet: Floret Generator without Retr.
											Floret Generator without Retraction
								For every generated solution, you will find the data saved in out/TheTimeStampedResults/Optimized Parameters/gen_distributions.mat
								Individual statistics								Segment-Lengths
Std of segment length	Mean of segment length	Mean of fitted distribution	Std of fitted distribution	Number of branches	Asymmetry	Average depth of florets	Maximal depth of florets									2.0028
0	27.5179	3.31484	0	1	0	1	1									2.02432
14.7959	23.7844	2.98268	0.816056	3	0	1.66667	2									2.05416
0	48.9634	3.89107	0	1	0	1	1									2.06633
34.6429	46.0669	3.61692	0.670814	9	0.65	3.22222	5									2.0742
49.481	63.947	3.77923	1.02447	7	0.444444	2.71429	4									2.08624
12.8746	20.7135	2.89205	0.5746	5	1	2.2	3									2.15924
0	37.0429	3.61208	0	1	0	1	1									2.17759
74.4224	75.2856	3.98492	0.820357	9	0.333333	2.77778	4									2.18468
90.0113	63.0991	3.23621	1.70504	3	0	1.66667	2									2.18824
34.119	39.6587	3.38853	0.977251	3	0	1.66667	2									2.20724
0	9.82272	2.2847	0	1	0	1	1									2.21346
16.7917	26.3557	3.05165	0.90812	3	0	1.66667	2									2.26172
28.6071	24.1127	2.71249	1.03535	5	1	2.2	3									2.26298
68.3875	85.0373	4.23435	0.647684	9	0.333333	2.77778	4									2.31781
0	37.9106	3.63523	0	1	0	1	1									2.33679
29.2685	34.2691	3.20404	0.913193	7	0	2.42857	3									2.42419
41.5939	49.4137	3.61817	0.963685	3	0	1.66667	2									2.45217
32.942	47.9115	3.67862	0.682334	5	1	2.2	3									2.46871
26.4299	47.5606	3.62405	0.898376	7	0.444444	2.71429	4									2.50231
43.9933	47.1151	3.49891	1.08412	3	0	1.66667	2									2.59053
0	17.9462	2.88738	0	1	0	1	1									2.59078
0	15.0412	2.71079	0	1	0	1	1									2.6118
21.7751	38.8389	3.43984	0.82718	7	0	2.42857	3									2.61447
12.6072	12.0775	2.13146	1.01055	3	0	1.66667	2									2.61624
30.8691	36.5725	3.34376	0.717501	15	0.285714	3.4	5									2.64422
0	37.1136	3.61398	0	1	0	1	1									2.65563
24.1264	38.5414	3.52434	0.611908	3	0	1.66667	2									2.66684
41.5978	81.6673	4.3147	0.515559	3	0	1.66667	2									2.66981
0	69.5037	4.24138	0	1	0	1	1									2.71055
29.3934	35.1265	2.88465	1.82242	3	0	1.66667	2									2.72037
25.3174	32.797	3.00891	1.46758	3	0	1.66667	2									2.75305
4.50113	26.4275	3.26481	0.169295	3	0	1.66667	2									2.75489
0	18.1976	2.90129	0	1	0	1	1									2.7636
42.8664	66.2754	3.96915	0.916592	3	0	1.66667	2									2.84221
73.5019	87.5873	4.13172	1.11553	3	0	1.66667	2									2.8549
45.2794	50.8312	3.42194	1.25718	5	1	2.2	3									2.87206
0	32.3113	3.47542	0	1	0	1	1									2.89534
25.1187	37.7246	3.41708	0.766041	5	1	2.2	3									2.89907
14.4217	61.5091	4.09637	0.240832	5	1	2.2	3									2.90299
27.0985	49.2929	3.78714	0.590126	3	0	1.66667	2									2.91116
20.234	42.3137	3.66771	0.483499	3	0	1.66667	2									2.94726
89.2594	124.405	4.50539	1.12634	3	0	1.66667	2									3.03425
36.365	46.1018	3.54885	0.996622	3	0	1.66667	2									3.09759
27.9234	29.9092	3.02685	1.00944	5	1	2.2	3									3.19651
23.2897	64.6662	4.1286	0.343111	3	0	1.66667	2									3.19659
24.0371	28.7431	2.92912	1.32169	3	0	1.66667	2									3.2266
0	64.8881	4.17266	0	1	0	1	1									3.25412
48.5606	75.8452	4.09444	0.94635	3	0	1.66667	2									3.25717
0	76.5868	4.33842	0	1	0	1	1									3.2968
73.8359	47.5217	2.57835	2.08836	3	0	1.66667	2									3.3177
0	3.53285	1.26211	0	1	0	1	1									3.32049
0	24.6535	3.20492	0	1	0	1	1									3.33086
0	3.73275	1.31715	0	1	0	1	1									3.35787
35.2395	71.766	4.18119	0.544408	3	0	1.66667	2									3.38236
13.3069	23.5928	3.00346	0.752282	3	0	1.66667	2									3.39843
17.5898	25.4663	3.07641	0.694735	3	0	1.66667	2									3.4391
13.975	33.9154	3.46331	0.43357	3	0	1.66667	2									3.44809
20.2824	21.4523	2.4833	1.38369	5	1	2.2	3									3.48166
70.6582	66.0013	3.71208	1.2657	3	0	1.66667	2									3.52623
0	70.3775	4.25387	0	1	0	1	1									3.55595
33.8621	22.5461	2.09873	1.75755	3	0	1.66667	2									3.55735
68.0018	66.0716	3.78175	1.14356	3	0	1.66667	2									3.62828
44.2249	48.1817	3.47163	0.988673	9	0.65	3.22222	5									3.67416
5.17425	7.31048	1.83435	0.66228	3	0	1.66667	2									3.68836
0	6.54832	1.87921	0	1	0	1	1									3.70819
0	61.5075	4.11916	0	1	0	1	1									3.75097
27.8853	32.8573	3.0612	1.07265	11	0.628571	3.36364	5									3.84345
25.2749	29.2121	2.98951	1.04333	5	1	2.2	3									3.88144
22.0514	61.3445	4.07658	0.338717	3	0	1.66667	2									3.88713
0	12.5114	2.52664	0	1	0	1	1									3.89597
6.66186	12.0472	2.37744	0.591367	3	0	1.66667	2									3.90323
38.8246	55.3093	3.84739	0.703563	3	0	1.66667	2									3.90334
0	8.75046	2.16911	0	1	0	1	1									3.9535
37.5399	37.8208	3.17462	1.28479	3	0	1.66667	2									4.00281
96.045	101.108	4.33029	0.894088	3	0	1.66667	2									4.01109
20.4055	36.9901	3.42513	0.760503	5	1	2.2	3									4.11739
45.3032	57.0309	3.83932	0.769627	3	0	1.66667	2									4.11943
24.5221	37.8841	3.3883	0.874537	5	1	2.2	3									4.14083
30.8394	43.2745	3.56097	0.82914	3	0	1.66667	2									4.18171
0	29.8278	3.39544	0	1	0	1	1									4.20805
16.041	41.7468	3.66236	0.433765	5	1	2.2	3									4.22476
29.9734	48.8721	3.4607	1.38571	5	1	2.2	3									4.2562
0	29.9873	3.40077	0	1	0	1	1									4.33707
35.4781	35.6392	3.09207	1.33342	3	0	1.66667	2									4.34744
25.2678	55.0318	3.92404	0.523659	3	0	1.66667	2									4.35511
21.7384	30.0416	3.16256	0.771838	7	0	2.42857	3									4.36118
18.5491	47.009	3.80312	0.366113	3	0	1.66667	2									4.37506
56.4842	58.8303	3.56578	1.22347	5	1	2.2	3									4.37871
24.8403	41.9014	3.59217	0.689207	3	0	1.66667	2									4.50651
0	9.53125	2.25458	0	1	0	1	1									4.50819
38.753	34.4678	2.9109	1.53747	3	0	1.66667	2									4.53106
23.3725	36.9729	3.41612	0.730746	5	1	2.2	3									4.60181
0	20.895	3.03951	0	1	0	1	1									4.62419
30.9247	33.6647	3.18063	1.05052	3	0	1.66667	2									4.63703
13.3016	24.6907	3.11919	0.494796	3	0	1.66667	2									4.65451
25.3787	39.125	3.49211	0.675175	5	1	2.2	3									4.65549
0	17.7984	2.87911	0	1	0	1	1									4.66077
96.8284	65.1688	3.15231	1.80438	3	0	1.66667	2									4.69546
0	6.57501	1.88328	0	1	0	1	1									4.81863
36.0588	38.0106	3.28623	0.870678	7	0	2.42857	3									4.83023
120.678	96.6028	3.98153	1.32833	3	0	1.66667	2									4.85154
32.4948	44.7554	3.59837	0.715721	5	1	2.2	3									4.8559
23.5076	29.7	3.02243	1.20894	3	0	1.66667	2									4.8574
9.6551	29.5333	3.32733	0.412595	5	1	2.2	3									4.86536
34.3925	48.8929	3.61917	0.822287	9	0.333333	2.77778	4									4.87176
48.8547	58.2925	3.80344	0.817904	5	1	2.2	3									4.88332
0	50.2978	3.91796	0	1	0	1	1									4.90596
0	34.8439	3.55088	0	1	0	1	1									4.92274
32.0429	34.7692	2.95804	1.32618	9	0.333333	2.77778	4									4.95285
37.2207	47.2416	3.62414	0.856085	3	0	1.66667	2									4.99501
0	18.775	2.93253	0	1	0	1	1									5.00348
48.5591	51.3045	3.64713	0.811502	5	1	2.2	3									5.02017
52.7197	59.7422	3.81591	0.78717	7	0.444444	2.71429	4									5.03376
53.6188	44.2307	2.99356	1.77701	3	0	1.66667	2									5.0471
18.6362	48.6707	3.83407	0.39542	3	0	1.66667	2									5.06638
0	36.3155	3.59224	0	1	0	1	1									5.11061
12.8523	19.2272	2.69497	0.860363	7	0.444444	2.71429	4									5.20757
41.9705	89.2094	4.39376	0.575706	3	0	1.66667	2									5.20783
48.5008	79.4797	4.25823	0.581464	3	0	1.66667	2									5.24842
30.33	30.3095	2.7829	1.63395	3	0	1.66667	2									5.28399
7.90641	29.3541	3.3567	0.256812	3	0	1.66667	2									5.34496
15.3403	43.222	3.71208	0.375544	5	1	2.2	3									5.34779
54.0746	37.2123	2.89641	1.28254	7	0.444444	2.71429	4									5.37779
48.7566	70.4086	3.93296	1.00724	5	1	2.2	3									5.4219
0	27.8835	3.32804	0	1	0	1	1									5.47534
13.049	44.8479	3.76751	0.304402	5	1	2.2	3									5.4887
0	6.82733	1.92093	0	1	0	1	1									5.57823
19.1342	14.8498	2.08862	1.3232	3	0	1.66667	2									5.63628
27.9201	33.8501	3.13731	1.02398	7	0.444444	2.71429	4									5.69543
30.1935	37.299	3.16764	1.1767	7	0	2.42857	3									5.69939
15.4149	49.0494	3.86155	0.302058	3	0	1.66667	2									5.77213
0	19.3038	2.9603	0	1	0	1	1									5.78507
157.865	114.578	3.71697	1.98973	3	0	1.66667	2									5.80386
0	9.20721	2.21999	0	1	0	1	1									5.80963
42.8885	60.1448	3.80786	0.931463	9	0.333333	2.77778	4									5.8417
0	145.382	4.97936	0	1	0	1	1									5.87508
17.7488	23.8423	2.75546	1.33978	3	0	1.66667	2									5.87623
7.85838	15.4837	2.63909	0.571848	3	0	1.66667	2									5.93812
48.0712	58.8525	3.74349	1.10595	3	0	1.66667	2									5.97032
98.7908	84.3274	3.70478	1.69193	3	0	1.66667	2									6.0389
0	42.4277	3.7478	0	1	0	1	1									6.06548
0	79.7838	4.37932	0	1	0	1	1									6.07167
0	23.5447	3.1589	0	1	0	1	1									6.11348
50.5212	55.718	3.68955	0.85439	7	1	2.71429	4									6.15677
34.2906	51.1747	3.67285	0.892278	5	1	2.2	3									6.16173
0	3.54183	1.26464	0	1	0	1	1									6.16315
0	6.0187	1.79487	0	1	0	1	1									6.21325
45.1405	37.0736	2.99606	1.22653	5	1	2.2	3									6.21631
34.1025	42.0951	3.47896	0.777388	7	0.444444	2.71429	4									6.25653
11.2281	22.2567	2.85214	0.990364	5	1	2.2	3									6.28207
0	96.0456	4.56482	0	1	0	1	1									6.33532
45.0075	52.1782	3.58777	1.02802	5	1	2.2	3									6.34328
18.6128	35.4526	3.45971	0.522374	5	1	2.2	3									6.37528
55.7952	60.6697	3.6785	1.09941	5	1	2.2	3									6.39332
51.7699	79.346	4.13749	0.946318	3	0	1.66667	2									6.42753
20.1375	41.258	3.61356	0.604056	3	0	1.66667	2									6.43648
33.0284	32.4701	2.91913	1.4861	3	0	1.66667	2									6.45422
42.3112	60.9977	3.87712	0.801995	5	1	2.2	3									6.46355
16.5066	22.4713	2.75112	1.22032	3	0	1.66667	2									6.54596
17.4149	56.6762	3.99847	0.313761	5	1	2.2	3									6.56083
0	19.773	2.98432	0	1	0	1	1									6.60015
42.9039	57.2287	3.80276	0.769484	7	0.444444	2.71429	4									6.6183
0	36.7919	3.60528	0	1	0	1	1									6.64713
0	5.80655	1.75899	0	1	0	1	1									6.65449
0	3.01364	1.10315	0	1	0	1	1									6.69709
0	5.42754	1.69149	0	1	0	1	1									6.71541
55.2749	84.7097	4.30715	0.613252	3	0	1.66667	2									6.7408
10.5085	15.9848	2.57383	0.735671	5	1	2.2	3									6.74326
0	3.55881	1.26943	0	1	0	1	1									6.8173
0	35.0148	3.55577	0	1	0	1	1									6.8375
0	5.50536	1.70572	0	1	0	1	1									6.84227
55.1206	55.9579	3.49106	1.23143	9	0.333333	2.77778	4									6.87279
0	109.021	4.69154	0	1	0	1	1									6.89444
11.0617	24.377	3.12396	0.458759	3	0	1.66667	2									6.89998
25.5196	34.1781	3.30185	0.877586	3	0	1.66667	2									6.90516
0	44.5508	3.79663	0	1	0	1	1									6.9079
23.8122	41.295	3.54784	0.795952	3	0	1.66667	2									6.94437
0	41.6422	3.72911	0	1	0	1	1									6.94588
4.82475	9.46839	2.12734	0.649029	3	0	1.66667	2									6.96819
31.1887	27.0513	2.80671	1.21942	3	0	1.66667	2									6.98393
10.5388	20.184	2.87623	0.595819	5	1	2.2	3									7.01106
22.5747	29.5393	2.92781	1.42137	3	0	1.66667	2									7.08522
46.583	44.6198	3.16814	1.40023	5	1	2.2	3									7.09072
0	128.948	4.85941	0	1	0	1	1									7.15023
0	129.447	4.86327	0	1	0	1	1									7.17339
33.9302	64.7989	4.03236	0.621689	5	1	2.2	3									7.2459
17.345	22.6672	2.80642	1.09289	3	0	1.66667	2									7.36436
13.743	31.3765	3.35634	0.492087	5	1	2.2	3									7.36535
0	30.4959	3.41759	0	1	0	1	1									7.41341
0	17.4912	2.8617	0	1	0	1	1									7.47979
22.7741	34.5395	3.28535	0.846671	7	0.444444	2.71429	4									7.53537
61.3218	63.5985	3.80755	1.03972	3	0	1.66667	2									7.5528
0	2.72018	1.0007	0	1	0	1	1									7.55723
30.3297	40.8418	3.4321	1.01119	3	0	1.66667	2									7.5603
21.5362	30.9492	3.08424	1.02372	9	0.333333	2.77778	4									7.60711
32.4353	34.3153	3.07564	1.06874	13	0.722222	3.76923	6									7.61315
26.0828	27.8839	2.8099	1.27429	5	1	2.2	3									7.62292
27.4666	42.2733	3.55073	0.823692	3	0	1.66667	2									7.63717
10.6399	31.4331	3.40428	0.325988	5	1	2.2	3									7.6386
0	51.4629	3.94086	0	1	0	1	1									7.68058
0	21.4632	3.06634	0	1	0	1	1									7.71396
15.8835	32.3178	3.3634	0.625621	3	0	1.66667	2									7.72243
34.9833	40.0903	3.33866	0.972736	5	1	2.2	3									7.75123
0	47.5369	3.86151	0	1	0	1	1									7.75138
44.7495	36.0567	2.96926	1.32787	5	1	2.2	3									7.83284
0	33.0738	3.49874	0	1	0	1	1									7.84565
22.5261	36.2683	3.38614	0.788019	5	1	2.2	3									7.85592
0	108.205	4.68403	0	1	0	1	1									7.90566
26.1036	31.9472	3.22119	0.871072	3	0	1.66667	2									7.92003
0	49.0447	3.89273	0	1	0	1	1									7.93247
23.6112	37.2752	3.24812	1.22266	5	1	2.2	3									7.96275
40.2239	39.0497	3.31861	0.98778	3	0	1.66667	2									7.96433
15.4964	14.6612	2.25309	1.17427	3	0	1.66667	2									7.97657
0	140.79	4.94727	0	1	0	1	1									7.99582
0	16.3475	2.79407	0	1	0	1	1									8.00895
77.425	105.428	4.26987	1.28236	3	0	1.66667	2									8.04213
0	85.3218	4.44643	0	1	0	1	1									8.07434
0	19.8875	2.99009	0	1	0	1	1									8.07958
0	14.61	2.68171	0	1	0	1	1									8.08107
7.5655	11.8788	2.24387	0.938638	3	0	1.66667	2									8.15447
0	35.026	3.55609	0	1	0	1	1									8.15727
0	27.0638	3.2982	0	1	0	1	1									8.178
28.1606	26.2476	2.77135	1.30468	3	0	1.66667	2									8.18135
16.9875	21.5726	2.86554	0.779561	3	0	1.66667	2									8.224
0	22.5799	3.11706	0	1	0	1	1									8.24857
18.3886	23.955	2.88379	1.03578	3	0	1.66667	2									8.25838
0	109.057	4.69187	0	1	0	1	1									8.264
8.86853	22.0565	3.04436	0.374325	3	0	1.66667	2									8.35487
0	69.7223	4.24452	0	1	0	1	1									8.40444
57.0924	52.1851	3.5432	1.09236	3	0	1.66667	2									8.41276
30.8869	41.9307	3.47101	0.981154	3	0	1.66667	2									8.45533
34.8477	25.643	2.53481	1.43215	3	0	1.66667	2									8.46677
0	61.5491	4.11983	0	1	0	1	1									8.52256
0	141.615	4.95312	0	1	0	1	1									8.52627
23.2942	32.5918	3.30943	0.637181	5	1	2.2	3									8.53347
14.8549	17.5502	2.62915	0.829917	3	0	1.66667	2									8.63295
83.8356	56.8171	3.34848	1.28016	9	0.55	3	4									8.66685
18.6219	27.5459	3.17828	0.618898	3	0	1.66667	2									8.66812
0	8.16606	2.09999	0	1	0	1	1									8.66816
0	65.5783	4.18325	0	1	0	1	1									8.71288
0	89.0832	4.48957	0	1	0	1	1									8.74463
12.8265	21.9877	2.93634	0.644465	5	1	2.2	3									8.74867
37.6153	45.9177	3.62123	0.755894	3	0	1.66667	2									8.76602
8.5747	18.788	2.85508	0.498637	3	0	1.66667	2									8.77933
15.7301	25.1688	3.1036	0.591266	3	0	1.66667	2									8.78969
40.1754	45.2046	3.54749	0.78194	5	0.5	2.2	3									8.83897
0	36.5579	3.5989	0	1	0	1	1									8.88079
22.8693	41.3914	3.56258	0.679088	5	1	2.2	3									8.89102
61.4724	50.2628	3.13225	1.53916	5	1	2.2	3									8.92665
44.6374	64.422	3.97716	0.784067	3	0	1.66667	2									8.95082
75.9048	76.8294	3.82468	1.41494	3	0	1.66667	2									8.99167
0	28.4723	3.34893	0	1	0	1	1									9.00811
0	20.0255	2.99701	0	1	0	1	1									9.01173
0	245.449	5.50309	0	1	0	1	1									9.05737
17.9317	23.5917	2.77068	1.11213	5	1	2.2	3									9.08077
23.5881	34.659	3.25193	0.963604	9	0.65	3.22222	5									9.09397
21.6392	40.7805	3.59051	0.627846	3	0	1.66667	2									9.09566
24.0099	31.3019	2.97424	1.44458	3	0	1.66667	2									9.15316
39.381	35.2156	3.12399	1.01894	5	1	2.2	3									9.22034
15.1756	24.326	3.01564	0.782535	3	0	1.66667	2									9.24937
44.8123	53.0746	3.6027	1.03045	5	1	2.2	3									9.25362
0	42.7591	3.75558	0	1	0	1	1									9.26909
31.4522	41.4598	3.4438	0.886387	5	1	2.2	3									9.27784
0	49.3214	3.89836	0	1	0	1	1									9.29576
43.63	37.6077	3.14783	1.18585	3	0	1.66667	2									9.30061
10.5137	30.2702	3.36964	0.349307	3	0	1.66667	2									9.30325
108.095	128.845	4.25188	1.68927	3	0	1.66667	2									9.34617
17.5542	19.5861	2.67214	0.981109	3	0	1.66667	2									9.38798
8.29073	19.698	2.90938	0.482955	3	0	1.66667	2									9.40941
20.932	22.8335	2.73423	1.19243	3	0	1.66667	2									9.41624
49.1439	55.5888	3.3088	1.86387	3	0	1.66667	2									9.44954
16.2057	28.6935	3.20618	0.642007	5	1	2.2	3									9.53521
40.7933	49.5429	3.67081	0.834808	3	0	1.66667	2									9.53607
77.5369	72.314	3.46989	1.68319	5	1	2.2	3									9.55381
0	65.5023	4.18208	0	1	0	1	1									9.57353
0	106.434	4.66753	0	1	0	1	1									9.57901
0	72.0411	4.27724	0	1	0	1	1									9.6635
58.6693	59.1755	3.67104	1.02396	5	1	2.2	3									9.7181
0	27.2168	3.30383	0	1	0	1	1									9.71954
0	24.0068	3.17834	0	1	0	1	1									9.73724
7.8624	12.4329	2.30286	0.903117	3	0	1.66667	2									9.75711
0	2.61558	0.961486	0	1	0	1	1									9.8285
36.1392	39.976	3.34429	0.954028	5	1	2.2	3									9.83611
28.1551	61.8547	4.03289	0.492328	5	1	2.2	3									9.85044
35.92	44.6728	3.42074	1.03802	7	0.444444	2.71429	4									9.89597
12.6442	20.5387	2.81267	0.888437	3	0	1.66667	2									9.89782
0	38.8961	3.66089	0	1	0	1	1									9.89892
22.1066	39.3259	3.57604	0.519889	3	0	1.66667	2									9.95639
33.2973	58.3016	3.91119	0.649432	5	1	2.2	3									9.98928
66.3325	51.0105	3.34124	1.16403	7	0.444444	2.71429	4									9.99426
65.7485	62.5346	3.5296	1.26916	7	0.444444	2.71429	4									10.0295
65.7538	63.4117	3.80292	0.982904	3	0	1.66667	2									10.0393
28.9485	35.4254	3.3106	0.910679	3	0	1.66667	2									10.1068
49.947	51.1603	3.49086	1.10475	5	1	2.2	3									10.1135
29.5241	30.1286	2.88116	1.17141	7	0	2.42857	3									10.1389
0	180.832	5.19757	0	1	0	1	1									10.1657
44.2575	36.7094	2.97939	1.27756	5	1	2.2	3									10.1982
0	12.5808	2.53218	0	1	0	1	1									10.207
84.2906	45.7178	2.51198	1.72903	5	1	2.2	3									10.2689
0	97.3864	4.57869	0	1	0	1	1									10.3014
0	7.84027	2.05927	0	1	0	1	1									10.3244
0	106.87	4.67161	0	1	0	1	1									10.3255
14.6912	46.7129	3.80735	0.340324	3	0	1.66667	2									10.335
14.3699	27.957	3.21938	0.53993	5	1	2.2	3									10.4023
33.9917	38.559	3.34749	0.996779	3	0	1.66667	2									10.5365
0	17.9699	2.8887	0	1	0	1	1									10.5457
6.27295	9.80572	2.15782	0.594324	3	0	1.66667	2									10.6582
0	6.76034	1.91107	0	1	0	1	1									10.7003
37.4667	39.1924	3.26462	0.981855	11	0.6	3	4									10.7066
19.2856	17.2013	2.39615	1.1545	3	0	1.66667	2									10.8001
38.1738	50.8534	3.65014	1.00995	3	0	1.66667	2									10.811
0	60.6628	4.10533	0	1	0	1	1									10.8226
19.8486	27.9837	3.08658	0.81808	5	1	2.2	3									10.8333
14.9	19.4359	2.61238	1.05733	5	1	2.2	3									10.941
55.4332	50.8725	3.03568	2.06967	3	0	1.66667	2									11.0657
0	3.17475	1.15523	0	1	0	1	1									11.0918
28.3033	39.5266	3.41812	0.853587	5	1	2.2	3									11.1061
37.9521	67.8014	4.0568	0.761779	3	0	1.66667	2									11.1086
0	120.871	4.79472	0	1	0	1	1									11.1777
0	15.6733	2.75196	0	1	0	1	1									11.1826
0	7.40661	2.00237	0	1	0	1	1									11.2108
38.5375	43.2863	3.24698	1.24174	9	0.333333	2.77778	4									11.328
0	23.1507	3.14202	0	1	0	1	1									11.3362
17.5652	24.0286	2.83213	1.18926	3	0	1.66667	2									11.3573
0	19.3772	2.9641	0	1	0	1	1									11.3769
12.1691	15.2579	2.52917	0.740301	3	0	1.66667	2									11.4018
24.5251	31.4975	3.23341	0.726485	5	1	2.2	3									11.4119
0	119.228	4.78104	0	1	0	1	1									11.4138
16.66	24.9673	2.9751	0.876659	5	1	2.2	3									11.4525
0	41.9428	3.73631	0	1	0	1	1									11.4807
52.5245	44.688	3.24853	1.32828	3	0	1.66667	2									11.4844
36.2057	72.889	4.19132	0.564509	3	0	1.66667	2									11.487
0	130.027	4.86774	0	1	0	1	1									11.5299
12.4799	31.6124	3.38796	0.468019	3	0	1.66667	2									11.5405
33.3391	35.3486	2.92561	1.45113	5	1	2.2	3									11.5418
47.2282	57.644	3.48756	1.6196	3	0	1.66667	2									11.5541
16.4767	17.3676	2.51565	1.03625	3	0	1.66667	2									11.5581
0	20.0884	3.00014	0	1	0	1	1									11.6044
35.726	54.671	3.7753	0.77559	7	0.444444	2.71429	4									11.6405
32.21	38.7953	3.19561	1.29163	5	1	2.2	3									11.6545
0	9.39462	2.24014	0	1	0	1	1									11.6554
0	110.837	4.70806	0	1	0	1	1									11.6701
48.7585	67.9392	3.63488	1.63916	5	1	2.2	3									11.6943
0	10.521	2.35337	0	1	0	1	1									11.6944
15.6634	44.8558	3.75458	0.399721	3	0	1.66667	2									11.7434
16.3764	26.1199	3.05759	0.869955	3	0	1.66667	2									11.7518
0	11.4718	2.43989	0	1	0	1	1									11.774
0	44.7672	3.80148	0	1	0	1	1									11.7805
44.4827	44.9765	3.35417	1.27349	3	0	1.66667	2									11.7835
19.5693	43.3044	3.63209	0.667545	5	1	2.2	3									11.8193
21.012	31.6011	3.27939	0.666395	5	1	2.2	3									11.8403
26.9275	45.4151	3.51056	1.08261	5	1	2.2	3									11.8464
38.2577	39.636	3.23932	0.981995	15	0.489177	3.93333	6									11.9538
0	46.1757	3.83245	0	1	0	1	1									11.9789
0	7.60513	2.02882	0	1	0	1	1									12.0561
0	152.491	5.02711	0	1	0	1	1									12.0981
8.58741	12.6717	2.34023	0.826247	3	0	1.66667	2									12.24
0	103.914	4.64356	0	1	0	1	1									12.2896
0	21.7706	3.08056	0	1	0	1	1									12.3175
44.1236	79.8264	4.17159	0.802771	7	0	2.42857	3									12.3473
29.0803	38.1626	3.21342	1.22217	7	0.444444	2.71429	4									12.4739
0	115.186	4.74655	0	1	0	1	1									12.5294
37.2494	73.9978	4.17296	0.609466	5	1	2.2	3									12.5322
0	18.3283	2.90845	0	1	0	1	1									12.5874
0	46.0164	3.829	0	1	0	1	1									12.6305
103.437	87.1022	3.81901	1.51592	3	0	1.66667	2									12.6504
39.746	48.5115	3.69041	0.60096	7	0.444444	2.71429	4									12.699
32.5243	75.7599	4.25892	0.405707	5	1	2.2	3									12.735
0	17.6032	2.86808	0	1	0	1	1									12.7534
0	3.52365	1.2595	0	1	0	1	1									12.7849
64.6286	44.8284	2.79454	1.85823	3	0	1.66667	2									12.7905
28.5726	49.6178	3.74314	0.663159	5	1	2.2	3									12.8247
7.86752	26.8449	3.25661	0.328625	3	0	1.66667	2									12.8506
23.8352	20.4735	2.39656	1.48747	3	0	1.66667	2									12.861
69.4425	98.2139	4.24009	1.11543	5	1	2.2	3									12.9288
0	14.4892	2.6734	0	1	0	1	1									12.9836
39.8903	63.1236	3.9742	0.639996	7	0.444444	2.71429	4									13.0047
19.4323	27.2652	2.95977	1.195	3	0	1.66667	2									13.0162
0	10.2711	2.32933	0	1	0	1	1									13.1374
8.28287	11.9302	2.31226	0.712734	3	0	1.66667	2									13.1692
0	111.701	4.71582	0	1	0	1	1									13.1849
10.0647	27.1087	3.25673	0.353254	3	0	1.66667	2									13.2162
48.4056	79.6602	4.16695	0.816523	5	1	2.2	3									13.2295
62.0387	77.6042	4.12104	0.734512	5	1	2.2	3									13.3031
59.6905	63.4935	3.7725	0.929607	11	0.5	3.18182	5									13.3066
0	7.63192	2.03234	0	1	0	1	1									13.3139
45.6619	56.207	3.67774	1.0365	5	1	2.2	3									13.3174
0	19.6765	2.97943	0	1	0	1	1									13.322
43.9764	45.3994	3.52768	0.759474	7	0.444444	2.71429	4									13.3324
58.2105	49.5963	3.32837	1.14036	11	0.352381	3.36364	5									13.3485
0	39.4225	3.67434	0	1	0	1	1									13.3737
55.5755	57.4193	3.49248	1.39164	5	1	2.2	3									13.3975
0	9.18725	2.21782	0	1	0	1	1									13.4232
66.2049	38.9202	2.69505	1.41661	5	1	2.2	3									13.4459
5.98897	18.5043	2.88162	0.333764	3	0	1.66667	2									13.4861
20.009	27.3851	3.10614	0.716692	5	1	2.2	3									13.5031
26.9175	31.0055	2.78963	1.74789	3	0	1.66667	2									13.5172
56.7245	52.618	3.50083	1.02882	7	0	2.42857	3									13.5479
15.8045	19.8191	2.78691	0.752821	3	0	1.66667	2									13.5731
36.8473	61.8485	3.95183	0.786819	3	0	1.66667	2									13.5733
42.1494	56.4154	3.62156	1.32782	3	0	1.66667	2									13.5795
16.2371	22.9042	2.89353	0.771931	7	0.444444	2.71429	4									13.6289
44.8552	43.394	3.42452	0.983448	3	0	1.66667	2									13.6383
51.834	48.9648	3.52501	1.01288	3	0	1.66667	2									13.6985
59.6571	43.6005	2.96211	1.52654	5	1	2.2	3									13.7151
0	65.4228	4.18087	0	1	0	1	1									13.7586
0	7.3315	1.99218	0	1	0	1	1									13.7918
46.205	45.591	3.39425	1.19475	3	0	1.66667	2									13.8492
9.5408	10.1712	1.97143	1.06725	3	0	1.66667	2									13.8589
30.5769	32.2296	3.18934	0.888456	3	0	1.66667	2									13.901
69.0112	60.1956	3.48913	1.47563	3	0	1.66667	2									13.9051
93.0071	81.4737	3.9282	1.18797	3	0	1.66667	2									14.0064
30.1444	26.677	2.63377	1.38585	5	1	2.2	3									14.0273
9.99824	24.0954	3.10814	0.498887	3	0	1.66667	2									14.0472
51.495	45.5298	3.08457	1.41307	5	1	2.2	3									14.0723
80.506	55.8074	3.05399	1.78479	3	0	1.66667	2									14.1175
0	67.8526	4.21734	0	1	0	1	1									14.1457
22.1545	28.8635	3.14829	0.818871	3	0	1.66667	2									14.1789
34.4275	53.2581	3.78651	0.810759	3	0	1.66667	2									14.1977
36.7692	61.4583	3.92495	0.848799	3	0	1.66667	2									14.2144
0	32.3832	3.47764	0	1	0	1	1									14.259
0	10.6326	2.36393	0	1	0	1	1									14.2862
43.1468	44.029	3.52009	0.726292	5	1	2.2	3									14.3683
0	3.08514	1.1266	0	1	0	1	1									14.37
48.6886	75.6035	3.86754	1.43025	5	1	2.2	3									14.3899
18.2514	34.0264	3.13999	1.32914	5	1	2.2	3									14.4147
																14.4772
																14.4975
																14.4986
																14.5009
																14.5636
																14.5911
																14.6269
																14.6356
																14.7158
																14.727
																14.7326
																14.7572
																14.8523
																14.9033
																14.923
																14.9285
																14.9789
																15.0038
																15.0111
																15.0601
																15.162
																15.1793
																15.2156
																15.2999
																15.317
																15.3825
																15.3873
																15.4389
																15.4702
																15.4993
																15.5133
																15.5918
																15.6012
																15.6613
																15.6829
																15.6973
																15.7195
																15.7501
																15.781
																15.8132
																15.824
																15.8559
																15.9707
																16.0056
																16.0216
																16.026
																16.0707
																16.0853
																16.1055
																16.1472
																16.1832
																16.194
																16.198
																16.2399
																16.2445
																16.3289
																16.383
																16.3905
																16.4737
																16.4883
																16.5138
																16.5382
																16.555
																16.6515
																16.6714
																16.6796
																16.6918
																16.709
																16.7457
																16.7492
																16.7727
																16.8571
																16.8625
																17.0667
																17.0774
																17.0848
																17.1184
																17.1513
																17.2039
																17.3017
																17.3507
																17.3613
																17.3778
																17.4424
																17.4485
																17.6548
																17.6598
																17.6638
																17.6934
																17.7186
																17.8373
																17.84
																17.8524
																17.855
																17.8808
																17.9445
																18.0164
																18.0751
																18.0795
																18.1402
																18.1478
																18.1645
																18.1759
																18.2442
																18.3445
																18.3837
																18.4981
																18.536
																18.5817
																18.6197
																18.6488
																18.7304
																18.8104
																18.8235
																18.8542
																18.9682
																19.0575
																19.0595
																19.0662
																19.0991
																19.1125
																19.142
																19.194
																19.2547
																19.2789
																19.3165
																19.3659
																19.3893
																19.4131
																19.4151
																19.4397
																19.4753
																19.5162
																19.5782
																19.614
																19.6496
																19.6682
																19.6871
																19.6886
																19.7946
																19.8691
																19.8783
																19.8794
																19.8961
																19.9642
																19.9743
																19.9815
																20.0269
																20.0814
																20.1245
																20.1615
																20.2918
																20.3191
																20.3558
																20.377
																20.4177
																20.4182
																20.4196
																20.4326
																20.4657
																20.4798
																20.5052
																20.5116
																20.5638
																20.5952
																20.6004
																20.6063
																20.7044
																20.9339
																20.963
																20.9828
																21.0201
																21.0543
																21.1574
																21.1912
																21.1956
																21.2057
																21.2202
																21.2715
																21.2764
																21.3263
																21.3597
																21.4092
																21.4418
																21.4828
																21.557
																21.5791
																21.5991
																21.6381
																21.6606
																21.6861
																21.7147
																21.936
																21.9602
																21.9843
																22.0192
																22.0641
																22.0721
																22.1606
																22.2949
																22.3051
																22.3123
																22.3131
																22.3614
																22.3756
																22.3905
																22.427
																22.4423
																22.4582
																22.4632
																22.4659
																22.5371
																22.5412
																22.5662
																22.786
																22.8426
																22.8603
																22.8847
																22.9175
																22.954
																22.9789
																23.0174
																23.0389
																23.1562
																23.1591
																23.189
																23.2161
																23.2876
																23.2925
																23.3509
																23.4031
																23.4329
																23.4542
																23.6583
																23.7354
																23.7485
																23.7592
																23.825
																23.836
																23.868
																23.892
																23.9857
																24.0522
																24.076
																24.0946
																24.1675
																24.1777
																24.1986
																24.2721
																24.2735
																24.2777
																24.2791
																24.2829
																24.322
																24.361
																24.4102
																24.5414
																24.557
																24.5726
																24.6483
																24.7344
																24.7657
																24.7842
																24.7942
																24.8617
																25.0172
																25.0547
																25.0711
																25.1037
																25.1517
																25.1792
																25.2352
																25.2607
																25.2891
																25.2908
																25.3067
																25.3177
																25.3721
																25.3909
																25.4618
																25.4619
																25.4938
																25.5526
																25.5911
																25.6187
																25.64
																25.7478
																25.7558
																25.7757
																25.7766
																25.8452
																25.8838
																25.9241
																25.9505
																25.9803
																25.9937
																26.0752
																26.0798
																26.094
																26.2505
																26.2869
																26.2889
																26.3035
																26.3101
																26.3664
																26.5337
																26.5649
																26.6749
																26.6949
																26.7434
																26.7716
																26.8089
																26.8228
																26.8682
																26.9634
																26.9718
																26.9727
																27.024
																27.0339
																27.1329
																27.2861
																27.3822
																27.3927
																27.5078
																27.5446
																27.6082
																27.6415
																27.6497
																27.6745
																27.8556
																27.8928
																27.9281
																27.9781
																27.9903
																28.0005
																28.0523
																28.0607
																28.0894
																28.0988
																28.1249
																28.1759
																28.2005
																28.2136
																28.3322
																28.3387
																28.3432
																28.3584
																28.3835
																28.4375
																28.4495
																28.4665
																28.554
																28.634
																28.6422
																28.6911
																28.7756
																28.8605
																28.9404
																28.9571
																29.0042
																29.0096
																29.0874
																29.2088
																29.2426
																29.3319
																29.3394
																29.3658
																29.4593
																29.5366
																29.6336
																29.6751
																29.7703
																29.7711
																29.8414
																29.897
																29.907
																29.9661
																30.0396
																30.108
																30.1156
																30.178
																30.2018
																30.3112
																30.3664
																30.4333
																30.4743
																30.4761
																30.5236
																30.5237
																30.7355
																30.8158
																30.8402
																30.8624
																30.936
																30.9657
																31.0516
																31.0881
																31.114
																31.1383
																31.2198
																31.2807
																31.3085
																31.3678
																31.4576
																31.5138
																31.5242
																31.5312
																31.5805
																31.6862
																31.7397
																31.7821
																31.9781
																32.0179
																32.1284
																32.1643
																32.2263
																32.2852
																32.314
																32.3401
																32.3481
																32.3782
																32.3981
																32.4002
																32.4487
																32.5015
																32.575
																32.7127
																32.7537
																32.8134
																32.9101
																32.9149
																32.9705
																33.001
																33.0027
																33.053
																33.1587
																33.1649
																33.2527
																33.2886
																33.4386
																33.5465
																33.6882
																33.7775
																33.8164
																33.8473
																33.8998
																33.9552
																33.9891
																34.0568
																34.1333
																34.1368
																34.2642
																34.2867
																34.3078
																34.3345
																34.3488
																34.3699
																34.4319
																34.432
																34.4531
																34.4803
																34.4908
																34.6172
																34.622
																34.6222
																34.6382
																34.6536
																34.6662
																34.6778
																34.6786
																34.8035
																34.8382
																34.9264
																35.0226
																35.0885
																35.1214
																35.152
																35.1684
																35.2541
																35.2773
																35.3551
																35.3962
																35.4336
																35.5159
																35.6023
																35.7134
																35.801
																35.8506
																35.8947
																35.9608
																35.9615
																35.9664
																35.9718
																36.0029
																36.1049
																36.2437
																36.2586
																36.319
																36.3989
																36.4021
																36.4718
																36.4991
																36.4999
																36.5255
																36.5439
																36.5812
																36.6888
																36.7637
																36.7756
																36.8351
																36.8995
																36.9547
																37.1222
																37.1355
																37.1589
																37.1993
																37.2075
																37.2703
																37.3082
																37.3393
																37.3548
																37.3916
																37.6589
																37.6956
																37.7694
																37.7732
																37.8335
																37.9098
																37.92
																37.9285
																37.9486
																38.0084
																38.1734
																38.1819
																38.2315
																38.2321
																38.2432
																38.2903
																38.3035
																38.3041
																38.438
																38.4899
																38.6576
																38.6704
																38.7136
																38.7165
																38.7336
																38.7964
																38.805
																38.8328
																38.933
																39.0426
																39.1106
																39.1527
																39.2077
																39.3794
																39.4372
																39.5103
																39.5579
																39.5715
																39.6035
																39.6946
																39.8564
																39.9286
																39.9548
																39.9557
																40.0107
																40.0577
																40.0774
																40.0895
																40.1245
																40.1578
																40.1725
																40.2262
																40.2438
																40.2483
																40.293
																40.333
																40.4049
																40.4275
																40.4415
																40.7022
																40.7212
																40.8186
																40.9624
																40.9876
																41.0308
																41.1193
																41.2836
																41.3648
																41.4823
																41.5978
																41.6511
																41.7385
																41.8822
																41.9166
																41.9322
																41.9392
																41.969
																41.9822
																42.0249
																42.0282
																42.0391
																42.0619
																42.1849
																42.1945
																42.275
																42.3184
																42.4097
																42.4691
																42.654
																42.6665
																42.6887
																42.7604
																42.7832
																42.8463
																42.8479
																42.8545
																42.8658
																42.9961
																43.0049
																43.2601
																43.2605
																43.2682
																43.2847
																43.2988
																43.2992
																43.4028
																43.4076
																43.474
																43.4891
																43.4921
																43.495
																43.69
																43.8025
																43.8287
																43.8589
																43.8781
																43.9641
																44.0748
																44.3577
																44.5499
																44.6271
																44.6378
																44.6555
																44.7018
																44.8422
																44.9275
																45.2557
																45.4345
																45.5043
																45.5413
																45.5606
																45.7108
																45.7889
																45.8338
																45.8961
																45.9078
																46.0907
																46.3246
																46.3519
																46.3527
																46.365
																46.4335
																46.443
																46.6649
																46.8469
																46.8571
																46.8905
																46.9383
																47.0275
																47.0564
																47.1286
																47.1431
																47.2105
																47.2217
																47.2376
																47.3368
																47.4637
																47.5803
																47.6664
																48.2382
																48.3524
																48.376
																48.3884
																48.3967
																48.4105
																48.4414
																48.5115
																48.5554
																48.6798
																48.6806
																48.6809
																48.7512
																48.8616
																48.954
																49.0672
																49.1578
																49.1952
																49.196
																49.318
																49.4238
																49.4463
																49.8222
																50.0365
																50.0444
																50.0989
																50.1931
																50.4098
																50.4247
																50.4837
																50.5096
																50.5354
																50.5462
																50.5924
																50.6488
																50.7557
																50.8584
																50.8746
																50.9339
																51.009
																51.0239
																51.0517
																51.3307
																51.3661
																51.5841
																51.6609
																51.7047
																51.7938
																51.8486
																51.8556
																51.8621
																51.8727
																52.0189
																52.0559
																52.1123
																52.2313
																52.3074
																52.3677
																52.4188
																52.5098
																52.5203
																52.5436
																52.5716
																52.6224
																52.7049
																52.8697
																52.9557
																53.0393
																53.2506
																53.2724
																53.3403
																53.4898
																53.5599
																53.8293
																53.8406
																53.8658
																53.8846
																53.9202
																53.9325
																53.9442
																54.1334
																54.1811
																54.2325
																54.2785
																54.3058
																54.4135
																54.5593
																54.5804
																54.6041
																55.0325
																55.0723
																55.2578
																55.2947
																55.4508
																55.4986
																55.7664
																55.8234
																55.8409
																56.0578
																56.1322
																56.186
																56.2358
																56.2693
																56.2773
																56.2984
																56.3732
																56.4322
																56.5704
																56.7148
																56.9214
																56.9283
																56.9565
																57.0515
																57.0625
																57.1119
																57.2881
																57.4876
																57.5286
																57.6604
																57.7206
																57.7465
																57.7811
																57.7937
																57.7964
																57.821
																57.9346
																57.9525
																58.1222
																58.1763
																58.3178
																58.3652
																58.413
																58.5581
																58.6358
																58.6542
																58.6703
																58.6747
																58.7118
																58.9131
																58.9223
																59.0646
																59.0709
																59.1047
																59.1057
																59.1215
																59.1677
																59.2097
																59.2739
																59.3578
																59.4685
																59.4748
																59.5959
																59.6361
																59.6957
																59.7965
																59.8276
																59.9828
																60.0691
																60.1447
																60.1968
																60.2191
																60.3282
																60.5857
																60.6132
																60.6347
																60.7237
																60.7856
																60.7863
																60.9783
																61.08
																61.2071
																61.2964
																61.2967
																61.3981
																61.738
																62.1187
																62.186
																62.3538
																62.3608
																62.3959
																62.4245
																62.4736
																62.4978
																62.5171
																62.6696
																62.7249
																62.8294
																62.8579
																62.9279
																63.1371
																63.2371
																63.3186
																63.4767
																63.505
																63.6036
																63.6737
																63.6887
																63.7088
																63.878
																64.0413
																64.51
																64.5936
																64.6002
																64.6963
																64.8478
																64.8603
																64.9741
																65.0048
																65.026
																65.1383
																65.1481
																65.2297
																65.2646
																65.3328
																65.3849
																65.5176
																65.6376
																65.7377
																65.7827
																66.1356
																66.5723
																66.591
																66.6776
																66.8849
																66.9396
																67.07
																67.1033
																67.1478
																67.1502
																67.2432
																67.2603
																67.2783
																67.3083
																67.3349
																67.3917
																67.4282
																67.4839
																67.5362
																67.7049
																67.7057
																67.8334
																67.8772
																68.0452
																68.0905
																68.152
																68.1759
																68.2496
																68.2587
																68.2659
																68.3748
																68.4375
																68.7556
																68.7879
																68.7894
																68.8814
																69.276
																69.3439
																69.5376
																69.6078
																69.6236
																69.7452
																69.7614
																69.8805
																69.9047
																69.9687
																70.0457
																70.0687
																70.0832
																70.1046
																70.1851
																70.1963
																70.2856
																70.3924
																70.9893
																71.0309
																71.4787
																71.7956
																71.9252
																72.0062
																72.0179
																72.0477
																72.12
																72.5415
																72.6108
																72.6414
																72.9048
																72.931
																73.1005
																73.3075
																73.4873
																73.5244
																73.8222
																73.8795
																73.9194
																74.1055
																74.1914
																74.4289
																74.5268
																74.634
																74.7246
																74.7886
																74.8546
																74.9351
																75.0129
																75.0184
																75.4074
																75.4811
																75.54
																75.6453
																75.9003
																75.9044
																75.9532
																76.047
																76.0711
																76.2201
																76.2457
																76.4116
																76.7552
																76.841
																76.853
																76.8825
																77.0028
																77.1386
																77.1816
																77.352
																77.4488
																77.4527
																77.4568
																77.5196
																77.5494
																77.6962
																77.7098
																77.8765
																78.142
																78.1712
																78.2079
																78.2383
																78.3142
																78.4494
																78.6396
																78.6552
																79.2632
																79.4593
																79.4852
																79.4892
																79.7211
																79.9325
																80.0116
																80.1174
																80.156
																80.2361
																80.5945
																80.6128
																80.759
																81.1989
																81.3378
																81.3516
																81.4576
																81.5359
																81.5501
																81.6244
																81.7138
																81.8305
																81.8599
																81.8893
																82.1281
																82.4235
																82.5496
																82.5636
																82.7011
																82.7767
																82.9054
																83.022
																83.4936
																83.5938
																83.9443
																84.299
																84.8055
																84.841
																84.945
																84.9784
																85.0503
																85.0719
																85.1004
																85.1349
																85.2332
																85.5544
																85.6868
																86.195
																86.2782
																86.3385
																86.5723
																86.863
																87.336
																87.6212
																87.702
																87.9505
																88.0653
																88.4699
																88.5482
																88.5948
																88.6103
																88.6695
																88.6737
																89.0688
																89.2388
																89.2724
																89.3138
																89.5482
																89.5763
																89.6943
																89.6967
																89.7957
																89.9478
																90.6006
																90.6538
																90.7199
																90.7732
																90.8288
																90.8775
																91.1512
																91.506
																91.7129
																92.1413
																93.034
																93.0449
																93.1068
																93.2622
																93.3758
																93.6597
																93.997
																94.2316
																94.5915
																94.7437
																95.0817
																95.4708
																95.5909
																95.8621
																96.2036
																96.2554
																96.3922
																96.6299
																96.6319
																96.9529
																97.01
																97.6748
																97.8579
																98.1661
																98.2452
																98.2453
																98.344
																98.425
																99.0449
																99.4872
																99.669
																100.05
																100.414
																100.807
																101.166
																101.566
																101.707
																101.977
																102.321
																102.503
																102.608
																102.843
																102.908
																103.108
																103.154
																103.272
																103.565
																103.635
																104.148
																104.47
																104.7
																104.833
																105.255
																106.028
																106.04
																106.195
																107.343
																107.983
																108.616
																109.012
																109.789
																109.817
																109.858
																110.662
																110.716
																111.023
																111.083
																111.657
																111.767
																111.895
																112.269
																112.906
																113.099
																113.157
																113.442
																113.738
																114.178
																115.341
																115.726
																115.817
																115.987
																116.495
																116.59
																116.781
																117.304
																117.343
																117.429
																117.498
																118.188
																118.496
																118.679
																119.881
																119.891
																120.072
																120.282
																120.542
																120.73
																120.864
																121.078
																121.617
																122.004
																122.244
																122.455
																122.669
																123.672
																124.085
																125.312
																125.646
																126.038
																126.726
																127.189
																127.521
																129.409
																130.579
																131.103
																131.163
																131.322
																131.557
																131.706
																131.71
																131.835
																132.669
																133.093
																133.934
																133.989
																134.087
																134.457
																134.89
																135.563
																135.991
																136.066
																136.073
																136.533
																136.542
																138.483
																140.075
																140.108
																140.222
																140.401
																140.944
																140.955
																141.84
																142.406
																142.479
																142.514
																142.878
																143.063
																143.254
																143.448
																143.617
																145.135
																145.149
																145.913
																147.599
																149.355
																150.006
																150.678
																151.194
																153.022
																153.202
																153.424
																155.517
																157.115
																157.135
																157.477
																158.864
																158.913
																159.44
																159.501
																161.119
																161.249
																162.341
																163.457
																163.471
																166.507
																167.462
																168.067
																168.261
																169.725
																169.889
																170.94
																174.191
																175.186
																175.444
																176.698
																177.14
																177.39
																178.93
																180.535
																181.33
																182.094
																183.552
																185.439
																186.828
																191.424
																192.731
																193.118
																194.278
																201.719
																201.893
																205.17
																209.333
																209.973
																210.167
																213.602
																217.835
																219.252
																223.838
																224.543
																240.891
																242.225
																256.085
																274.148
																290.844
																327.251
																327.454
																346.249
																444.404

## Sheet: Galton Watson
										Galton-Watson model
							For every generated solution, you will find the data saved in out/TheTimeStampedResults/Optimized Parameters/gen_distributions.mat
							Individual statistics								Segment-Lengths
Std of segment length	Mean of segment length	Mean of fitted distribution	Std of fitted distribution	Number of branches	Asymmetry	Average depth of florets	Maximal depth of florets
0	33.9189	3.52397	0	1	0	1	1								5.00755
9.80212	25.7128	3.19114	0.372517	5	1	2.2	3								5.11051
8.43198	40.1985	3.67953	0.205695	3	0	1.66667	2								5.1386
35.3809	41.6923	3.47318	0.890229	3	0	1.66667	2								5.16409
14.5685	22.1306	2.96665	0.602551	3	0	1.66667	2								5.18246
21.6068	30.4278	3.09726	1.12979	3	0	1.66667	2								5.20818
62.5601	62.0697	3.746	0.922927	15	0.452381	3.66667	6								5.25209
16.4482	18.5166	2.56188	0.949328	5	1	2.2	3								5.27831
45.3651	59.5563	3.71664	1.00694	15	0.331169	4.2	6								5.3709
43.8944	67.9569	3.97348	0.869902	5	1	2.2	3								5.46652
30.1203	39.2394	3.43523	0.769439	5	1	2.2	3								5.54258
0	95.9447	4.56377	0	1	0	1	1								5.57581
0	54.3508	3.99546	0	1	0	1	1								5.57935
35.7795	51.0629	3.63408	1.08713	3	0	1.66667	2								5.58656
36.8801	42.1623	3.36821	1.03922	5	1	2.2	3								5.65224
24.0001	41.1604	3.52931	0.671378	13	0.6	3.61538	6								5.67788
39.242	50.7423	3.58618	1.03545	5	1	2.2	3								5.6871
0	243.504	5.49513	0	1	0	1	1								5.68914
0	8.80818	2.17568	0	1	0	1	1								5.84912
64.6374	50.551	3.48606	0.900171	15	0.761905	3.66667	6								6.12433
76.8026	65.9497	3.47028	1.67672	3	0	1.66667	2								6.13348
0	23.8052	3.1699	0	1	0	1	1								6.15641
56.7706	59.1572	3.62419	1.0972	7	1	2.71429	4								6.29742
19.9519	43.3292	3.69382	0.422773	5	1	2.2	3								6.31683
26.3637	54.5724	3.87564	0.570813	7	0.444444	2.71429	4								6.317
0	49.0281	3.89239	0	1	0	1	1								6.33728
54.0735	51.0665	3.5588	0.884215	21	0.470635	4.2381	7								6.35329
49.6415	49.0033	3.50062	0.978412	5	1	2.2	3								6.3558
44.9415	59.9502	3.88919	0.702132	5	1	2.2	3								6.35773
17.3873	34.858	3.4694	0.493327	3	0	1.66667	2								6.35778
45.5823	52.3415	3.48526	1.10001	21	0.526667	4.14286	7								6.36265
0	47.835	3.86776	0	1	0	1	1								6.40387
26.2082	28.1735	3.06777	0.762688	9	0.333333	2.77778	4								6.47968
0	50.2291	3.91659	0	1	0	1	1								6.49069
31.9506	44.9516	3.46985	1.03729	5	1	2.2	3								6.55504
15.2919	26.9901	3.13863	0.615639	9	0.333333	2.77778	4								6.73884
31.718	43.0667	3.52058	0.774782	7	0.444444	2.71429	4								6.78959
29.2218	40.0294	3.38698	0.915493	9	0.333333	2.77778	4								6.86411
36.1921	47.6877	3.57774	0.836231	19	0.601852	4.47368	8								6.87964
30.7288	31.735	3.14956	0.806314	7	0.444444	2.71429	4								6.90112
41.1342	46.1023	3.42919	0.946735	27	0.58547	5.07407	9								6.98487
31.1925	39.1104	3.41707	0.734106	11	0.5	3.18182	5								6.98841
0	60.4222	4.10136	0	1	0	1	1								7.23927
12.5246	14.1538	2.38878	0.875444	3	0	1.66667	2								7.34632
24.9012	33.3125	3.32681	0.633336	5	1	2.2	3								7.43508
31.3754	36.5868	3.17379	1.09367	7	0.444444	2.71429	4								7.45065
0	31.9733	3.4649	0	1	0	1	1								7.67107
19.9059	36.3633	3.43211	0.645541	7	0.444444	2.71429	4								7.75139
16.9918	23.3526	2.98971	0.670384	3	0	1.66667	2								7.80431
14.6756	20.3556	2.79212	0.867861	3	0	1.66667	2								7.8996
34.8338	38.2629	3.24551	0.952789	15	0.779221	4.2	7								7.99877
0	151.177	5.01845	0	1	0	1	1								8.08546
0	70.0968	4.24988	0	1	0	1	1								8.116
3.69092	11.1448	2.37642	0.316981	3	0	1.66667	2								8.40651
20.3285	51.7216	3.86774	0.468703	5	1	2.2	3								8.5981
28.614	44.594	3.53904	0.835452	13	0.796296	4.23077	7								8.7052
83.4933	80.5262	3.59531	1.62795	5	1	2.2	3								8.75593
35.2801	42.6189	3.29596	1.10318	13	0.407407	3.61538	5								8.76335
43.596	49.9774	3.4257	1.23763	5	1	2.2	3								8.9405
27.649	52.4319	3.82247	0.613636	5	1	2.2	3								8.96373
148.106	120.22	4.14332	1.36694	5	1	2.2	3								8.96711
40.6712	66.5622	4.08266	0.466621	9	0.65	3.22222	5								9.07247
31.3491	46.6757	3.58777	0.789966	13	0.722222	3.76923	6								9.07356
48.0615	52.3286	3.54223	1.00882	9	0.333333	2.77778	4								9.1534
0	18.6663	2.92672	0	1	0	1	1								9.20603
36.1246	33.4507	3.0635	1.18756	3	0	1.66667	2								9.2307
31.702	42.0378	3.45557	0.812978	15	0.52381	3.4	5								9.30432
24.4314	42.0441	3.51232	0.804738	9	0.333333	2.77778	4								9.3612
9.5184	22.4044	3.0335	0.439427	5	1	2.2	3								9.55331
0	63.4106	4.14963	0	1	0	1	1								9.57732
24.1934	40.0056	3.42411	0.858848	17	0.35119	3.58824	5								9.61918
4.64378	15.1457	2.68885	0.287631	3	0	1.66667	2								9.62248
0	7.94246	2.07222	0	1	0	1	1								9.89064
5.81002	33.0669	3.48818	0.176505	3	0	1.66667	2								9.90058
53.6234	56.7216	3.66968	0.94565	7	0	2.42857	3								10.0352
61.2032	47.2134	3.33626	0.992333	25	0.616522	4.84	8								10.2909
27.7401	45.2803	3.62497	0.825429	3	0	1.66667	2								10.302
24.5011	50.8238	3.82935	0.577589	3	0	1.66667	2								10.3222
20.2226	123.185	4.8027	0.166581	5	1	2.2	3								10.5235
19.7667	32.8762	3.30515	0.829909	3	0	1.66667	2								10.5554
22.5076	78.2833	4.32824	0.32159	3	0	1.66667	2								10.613
51.4991	61.7892	3.74693	1.11731	5	1	2.2	3								10.6165
29.2668	33.5567	3.27725	0.681633	9	0.65	3.22222	5								10.6771
0	154.096	5.03757	0	1	0	1	1								10.7533
0	16.8935	2.82693	0	1	0	1	1								10.7704
13.0224	48.0662	3.84598	0.288301	3	0	1.66667	2								10.8113
21.2797	30.9928	3.18188	0.796184	11	0.5	3.18182	5								10.9262
32.1088	49.2133	3.70296	0.82161	3	0	1.66667	2								10.9313
92.574	87.7916	4.01917	0.999134	7	0	2.42857	3								11.1397
62.4626	61.6141	3.52006	1.56925	3	0	1.66667	2								11.2409
0	27.8763	3.32778	0	1	0	1	1								11.3295
48.444	50.3396	3.39006	1.18599	9	0.55	3	4								11.3469
0	11.8716	2.47415	0	1	0	1	1								11.3482
23.8411	38.0827	3.51563	0.599069	3	0	1.66667	2								11.3726
0	141.423	4.95175	0	1	0	1	1								11.4188
15.7796	35.6374	3.50934	0.435679	3	0	1.66667	2								11.735
96.6494	101.003	4.15491	1.10889	7	0.444444	2.71429	4								11.7605
19.0832	20.306	2.72786	0.894439	3	0	1.66667	2								11.8396
21.4029	24.6481	2.96481	0.825446	3	0	1.66667	2								11.8627
0	45.1977	3.81105	0	1	0	1	1								11.9626
58.0254	72.5386	3.91993	1.01463	11	0.5	3.18182	5								12.0112
36.1175	54.8112	3.84203	0.601801	7	0.444444	2.71429	4								12.0163
12.8057	57.4541	4.03304	0.236548	3	0	1.66667	2								12.366
33.4244	45.1486	3.64335	0.681481	3	0	1.66667	2								12.4468
24.9542	34.4517	3.35381	0.664753	5	1	2.2	3								12.4483
30.8826	39.5057	3.3957	0.791327	23	0.489394	4.47826	7								12.4763
0	19.9465	2.99305	0	1	0	1	1								12.8731
0	14.6666	2.68557	0	1	0	1	1								12.8983
33.1077	50.2763	3.64648	0.848984	11	0.628571	3.36364	5								12.974
0	70.1814	4.25108	0	1	0	1	1								13.0061
46.2346	66.9995	3.90426	0.883796	11	0.742857	3.72727	6								13.0814
55.3958	61.0183	3.74328	0.940243	9	0.333333	2.77778	4								13.0961
31.6379	37.6793	3.27008	0.927287	15	0.666667	4.06667	7								13.1049
40.7889	40.3958	3.30767	0.932881	9	0.333333	2.77778	4								13.1712
73.5878	55.1679	3.38286	1.18797	7	0.444444	2.71429	4								13.3714
32.6628	35.1491	3.14954	1.01857	7	0.444444	2.71429	4								13.502
0	50.694	3.92581	0	1	0	1	1								13.5567
13.8622	21.5758	2.93584	0.556313	5	1	2.2	3								13.6312
0	10.0473	2.30731	0	1	0	1	1								13.778
33.7447	42.1873	3.3987	0.958782	7	0.444444	2.71429	4								13.8335
0	135.743	4.91076	0	1	0	1	1								14.2085
26.7671	60.2397	3.95847	0.683247	5	1	2.2	3								14.2245
48.3011	65.1026	3.97558	0.792345	3	0	1.66667	2								14.2435
21.5584	41.2354	3.56953	0.668745	5	0.5	2.2	3								14.2689
24.0582	30.1432	3.08132	0.914061	7	0.444444	2.71429	4								14.4011
26.6243	67.9122	4.15619	0.393502	5	1	2.2	3								14.44
91.8805	105.081	4.39604	0.750708	7	0.444444	2.71429	4								14.5581
0	45.4515	3.81665	0	1	0	1	1								14.5877
24.3835	39.0857	3.46189	0.867789	3	0	1.66667	2								14.6844
25.9786	85.3488	4.41041	0.342958	3	0	1.66667	2								14.749
0	6.52299	1.87533	0	1	0	1	1								14.8263
54.3206	68.8921	3.81354	1.0751	17	0.616071	3.70588	6								15.0959
12.644	24.6525	3.11938	0.502216	3	0	1.66667	2								15.1464
0	11.2205	2.41774	0	1	0	1	1								15.1807
39.5128	41.2754	3.42509	0.913826	3	0	1.66667	2								15.204
0	21.0195	3.04545	0	1	0	1	1								15.2635
48.6755	51.7085	3.45994	1.19055	5	1	2.2	3								15.2864
0	45.9956	3.82855	0	1	0	1	1								15.4337
31.0904	40.2532	3.36477	0.906159	19	0.55	4.36842	7								15.4592
44.1566	50.0389	3.41855	1.21824	7	0.444444	2.71429	4								15.4858
51.2339	54.1593	3.71413	0.778453	5	1	2.2	3								15.5206
17.2159	46.972	3.79934	0.34852	5	1	2.2	3								15.5312
41.8213	41.3999	3.26734	0.977959	17	0.680769	4.76471	8								15.5673
73.5875	79.5186	4.0798	0.833051	5	1	2.2	3								15.7315
67.4864	47.1381	3.23356	1.12654	5	1	2.2	3								15.9772
46.5787	59.7338	3.85267	0.772189	5	1	2.2	3								16.2635
38.638	48.2465	3.47617	1.13467	5	1	2.2	3								16.2975
77.7267	66.4031	3.61838	1.08645	25	0.494108	4.76	8								16.3384
27.6389	39.0024	3.51205	0.649307	3	0	1.66667	2								16.4682
76.055	51.9577	3.21883	1.19003	11	0.5	3.18182	5								16.5156
64.4418	81.3527	4.13113	0.794156	7	0.444444	2.71429	4								16.6515
0	5.48743	1.70246	0	1	0	1	1								16.8219
39.695	47.7039	3.58253	0.971126	3	0	1.66667	2								16.8275
20.0929	35.068	3.39892	0.617411	9	0.333333	2.77778	4								16.8302
32.7953	43.207	3.48011	0.8456	13	0.7	3.30769	5								17.0649
55.0768	54.9999	3.52647	1.05124	9	0.65	3.22222	5								17.347
69.5516	78.2741	3.93849	1.27398	3	0	1.66667	2								17.4592
49.8062	55.3703	3.70493	0.812948	63	0.493228	6.36508	11								17.4853
21.8155	29.6096	3.14123	0.797563	7	0.444444	2.71429	4								17.582
80.6322	70.7498	3.60641	1.57082	3	0	1.66667	2								17.7606
36.8901	46.9861	3.5673	0.809906	11	0.1	3	4								17.8714
0	105.24	4.65624	0	1	0	1	1								18.164
48.5401	49.5424	3.45818	1.08667	5	1	2.2	3								18.1821
48.1294	54.3014	3.66578	0.8706	11	0.628571	3.36364	5								18.2438
75.0362	67.1807	3.75963	1.04098	7	0.444444	2.71429	4								18.2893
0	7.79714	2.05376	0	1	0	1	1								18.4369
61.5896	80.3648	4.13863	0.917608	3	0	1.66667	2								18.4905
21.737	33.3408	3.26857	0.77645	13	0.518519	3.92308	6								18.5892
21.1961	18.3599	2.5979	0.713105	7	0.444444	2.71429	4								18.6337
31.3801	37.6957	3.28916	0.899092	13	0.7	3.30769	5								18.7794
19.2346	37.1153	3.49638	0.559759	5	1	2.2	3								19.0396
0	17.9579	2.88803	0	1	0	1	1								19.1635
0	34.0219	3.52701	0	1	0	1	1								19.1962
35.7229	47.828	3.46852	1.30099	3	0	1.66667	2								19.2581
68.9963	64.1642	3.71222	0.981825	9	0.333333	2.77778	4								20.0188
8.87111	73.8315	4.29692	0.121128	3	0	1.66667	2								20.0313
56.173	51.1624	3.41312	1.04717	27	0.567155	4.7037	8								20.1954
0	22.616	3.11866	0	1	0	1	1								20.4717
82.5883	77.7718	3.83443	1.14903	9	0.333333	2.77778	4								20.4793
84.7063	58.2143	3.15013	1.66512	3	0	1.66667	2								20.513
39.3138	72.6773	4.13478	0.622519	7	0	2.42857	3								20.9389
51.9306	56.2557	3.75312	0.744078	9	0.65	3.22222	5								21.0971
51.5093	48.0205	3.43769	0.9197	23	0.619481	4.56522	8								21.1322
0	31.8073	3.45969	0	1	0	1	1								21.1818
100.86	66.1751	3.533	1.1657	7	0	2.42857	3								21.3373
30.1745	37.6165	3.31941	0.833721	17	0.616071	3.70588	6								21.7981
29.1354	40.3137	3.35788	1.1736	3	0	1.66667	2								21.8425
8.02609	27.7222	3.29002	0.321431	3	0	1.66667	2								21.8508
74.7815	54.5066	3.23248	1.2685	11	0.5	3.18182	5								21.8983
41.3648	31.0839	2.7573	1.4116	3	0	1.66667	2								22.0468
0	25.2283	3.22797	0	1	0	1	1								22.1804
31.9894	65.3199	3.98667	0.808622	7	0.444444	2.71429	4								22.2546
33.6399	31.1934	2.96842	1.04302	7	0.444444	2.71429	4								22.7503
0	76.8054	4.34127	0	1	0	1	1								23.0129
0	105.248	4.65632	0	1	0	1	1								23.0628
128.068	84.4736	3.65413	1.32383	5	1	2.2	3								23.3056
0	93.0296	4.53292	0	1	0	1	1								23.5308
82.3766	82.4403	3.78746	1.40855	5	1	2.2	3								23.635
9.27773	14.9353	2.56922	0.641972	3	0	1.66667	2								23.6505
32.8436	35.3609	3.09975	1.04642	11	0.1	3	4								24.2355
134.905	98.902	3.87676	1.44046	3	0	1.66667	2								24.3798
10.9637	33.3763	3.46793	0.35493	3	0	1.66667	2								24.4175
34.2445	53.9389	3.86665	0.581616	3	0	1.66667	2								24.525
0	48.5706	3.88302	0	1	0	1	1								24.7396
37.13	44.8195	3.47543	0.865224	17	0.330952	3.82353	6								25.239
55.658	65.3139	3.80463	0.936425	19	0.411111	3.73684	5								25.3004
69.0465	56.395	3.48661	1.05604	15	0.452381	3.66667	6								25.4284
44.1915	64.1476	3.95499	0.671635	9	0.65	3.22222	5								25.645
44.7506	54.4096	3.77247	0.811403	3	0	1.66667	2								25.6485
26.1438	48.506	3.7853	0.536266	3	0	1.66667	2								25.6954
0	59.041	4.07823	0	1	0	1	1								25.6962
16.1225	29.9191	3.20601	0.704212	17	0.616071	3.70588	6								25.7015
31.869	51.6301	3.79854	0.553662	9	0.333333	2.77778	4								25.7654
0	45.2953	3.8132	0	1	0	1	1								26.2748
119.53	161.822	4.55121	1.54439	5	0.5	2.2	3								26.3831
43.4441	62.5838	3.85588	0.855589	17	0.559524	3.82353	6								26.6217
35.4109	50.1188	3.71272	0.707003	5	1	2.2	3								26.9449
14.3489	15.0463	2.39105	0.863365	5	1	2.2	3								27.1969
27.0112	51.6676	3.85805	0.502352	3	0	1.66667	2								27.5941
33.484	43.8575	3.45553	0.886475	23	0.640909	4.65217	8								27.6589
73.6194	69.9817	3.92229	0.788915	9	0.333333	2.77778	4								27.669
82.2836	64.8549	3.55269	1.25763	5	1	2.2	3								27.8226
31.7851	44.2851	3.45995	0.950646	15	0.452381	3.66667	6								28.0432
49.8375	49.9162	3.50371	0.931225	9	0.65	3.22222	5								28.2091
26.9547	45.9782	3.63696	0.75327	5	1	2.2	3								28.2584
23.131	33.053	3.21552	0.915712	5	1	2.2	3								28.4042
14.6261	21.5911	2.87303	0.82673	3	0	1.66667	2								28.594
34.0637	37.3755	3.0573	1.27346	7	0.444444	2.71429	4								28.6771
0	54.5633	3.99936	0	1	0	1	1								28.9837
43.2872	43.5732	3.29936	1.12649	7	0.444444	2.71429	4								29.0924
0	200.613	5.30138	0	1	0	1	1								29.1905
41.4256	48.5295	3.51614	1.00546	7	0.444444	2.71429	4								29.1923
34.9208	64.1651	3.98892	0.667429	11	0.5	3.18182	5								29.3912
26.1423	38.664	3.3878	1.01752	3	0	1.66667	2								29.6655
38.4504	48.864	3.67753	0.650404	11	0.5	3.18182	5								29.9209
0	43.8424	3.7806	0	1	0	1	1								29.9951
0	8.78895	2.1735	0	1	0	1	1								30.0738
33.8839	40.3837	3.4551	0.857174	3	0	1.66667	2								30.3721
28.796	36.8467	3.2596	1.0471	5	1	2.2	3								30.4814
21.0211	29.2042	3.21206	0.680259	3	0	1.66667	2								30.5037
0.831337	33.292	3.50511	0.0250981	3	0	1.66667	2								30.5957
0	61.8995	4.12551	0	1	0	1	1								30.6819
47.5985	45.517	3.52907	0.715222	9	0.65	3.22222	5								30.7869
43.9695	48.3978	3.37885	1.13553	11	0.1	3	4								30.9935
61.8381	54.4743	3.53967	0.991321	7	0	2.42857	3								31.097
66.1395	60.9321	3.58488	1.07539	37	0.546494	6.51351	12								31.1333
61.5226	51.9547	3.29065	1.25489	7	0.444444	2.71429	4								31.1653
118.85	96.933	3.78195	1.75543	3	0	1.66667	2								31.2522
24.9104	27.678	2.9998	0.793735	17	0.616071	3.70588	6								31.4096
63.9127	64.4767	3.65964	1.14222	7	0	2.42857	3								31.8656
41.0488	72.3247	4.16224	0.613148	3	0	1.66667	2								31.8917
22.4611	40.9392	3.57096	0.592653	7	0.444444	2.71429	4								31.8966
57.1642	68.7113	3.9702	0.7552	13	0.7	3.30769	5								31.9797
0	5.22639	1.65372	0	1	0	1	1								32.1114
28.9873	23.966	2.69002	1.04693	5	1	2.2	3								32.2809
39.3221	43.0098	3.3408	1.13477	5	1	2.2	3								32.5286
31.6945	46.0863	3.64218	0.652228	7	0.444444	2.71429	4								33.1428
55.9543	56.4918	3.60323	0.958239	15	0.428571	3.8	6								33.1893
43.7519	38.7632	3.14108	1.11288	7	0	2.42857	3								33.261
45.7096	58.0208	3.76692	0.827713	17	0.616071	3.70588	6								33.281
36.7807	50.329	3.51031	1.05664	15	0.761905	3.66667	6								33.4184
46.4752	80.6173	4.21938	0.663384	7	0.444444	2.71429	4								33.4273
0	27.7226	3.32225	0	1	0	1	1								33.592
37.5676	44.7654	3.38976	1.02376	11	0.5	3.18182	5								33.7695
20.2582	29.0329	3.09666	1.01916	3	0	1.66667	2								33.8154
53.0578	49.5445	3.50457	0.910852	13	0.407407	3.61538	5								33.9916
57.9952	81.9276	4.23439	0.719885	3	0	1.66667	2								34.1137
30.2768	43.2307	3.4827	0.838865	17	0.608974	4.41176	7								34.1295
26.7142	35.4794	3.33461	0.749143	7	0.444444	2.71429	4								34.3247
0	105.452	4.65825	0	1	0	1	1								34.4078
47.593	83.2429	4.27876	0.612629	5	1	2.2	3								34.7648
35.055	47.6416	3.60145	0.800151	11	0.742857	3.72727	6								34.8575
25.2177	40.4252	3.52405	0.647073	9	0.65	3.22222	5								35.5173
60.5408	69.7788	3.8636	1.10939	5	1	2.2	3								35.7953
100.563	78.6103	3.75537	1.14219	9	0.65	3.22222	5								35.8076
0	52.0815	3.95281	0	1	0	1	1								35.8501
30.5917	28.7459	2.91365	1.19737	3	0	1.66667	2								36.0638
41.1492	53.6797	3.65721	0.895756	15	0.452381	3.66667	6								36.21
21.9237	37.2337	3.49429	0.536944	5	1	2.2	3								36.3166
38.9197	40.5806	3.24627	1.01019	19	0.444444	4.47368	7								36.7194
30.435	34.8199	3.25975	0.773483	13	0.6	3.61538	6								37.1572
40.2483	55.5475	3.78151	0.742933	13	0.322222	3.30769	5								37.2341
57.3302	55.9023	3.60518	1.03709	5	1	2.2	3								37.4556
62.1238	69.7098	3.68293	1.29825	9	0.65	3.22222	5								37.7723
0	174.112	5.1597	0	1	0	1	1								38.0515
56.7828	65.7291	3.84421	0.924922	9	0.65	3.22222	5								38.201
50.2548	67.9819	4.00463	0.698268	7	0.444444	2.71429	4								38.2596
19.8226	34.3401	3.36813	0.78074	3	0	1.66667	2								38.2657
0	50.0851	3.91372	0	1	0	1	1								38.3171
5.62813	21.3391	3.03436	0.288445	3	0	1.66667	2								38.8164
56.7445	47.5979	3.38015	0.975762	11	0.628571	3.36364	5								38.922
7.00952	23.4066	3.12414	0.291551	3	0	1.66667	2								39.2045
12.1021	21.1977	2.91148	0.587737	9	0.65	3.22222	5								39.3917
46.5693	42.9053	3.40715	0.804402	29	0.496905	5.34483	9								39.6708
31.2232	38.7252	3.38835	0.789083	7	0.444444	2.71429	4								40.3362
58.4936	60.8945	3.60677	1.13146	13	0.6	3.61538	6								40.7212
81.92	92.7031	4.29378	0.713631	5	1	2.2	3								40.7648
70.091	73.5615	3.8156	1.07752	15	0.52381	3.4	5								41.1528
78.9367	60.8987	3.54491	1.09485	7	0.444444	2.71429	4								42.106
67.6369	104.909	4.5158	0.63815	3	0	1.66667	2								42.1586
22.7725	28.0205	3.12816	0.670182	5	1	2.2	3								42.1838
0	13.0882	2.57171	0	1	0	1	1								42.2409
168.772	97.382	3.7126	1.27612	11	0.6	3	4								42.9222
0	129.084	4.86046	0	1	0	1	1								43.1232
42.5036	55.5289	3.73018	0.789797	19	0.342593	4.05263	6								43.1376
59.7868	54.2461	3.38812	1.17867	19	0.455556	3.94737	6								43.2696
0	50.2956	3.91792	0	1	0	1	1								43.2862
0	5.96572	1.78603	0	1	0	1	1								43.5749
40.6697	51.3994	3.69932	0.717142	9	0.65	3.22222	5								43.6658
13.3476	33.8768	3.45708	0.468699	3	0	1.66667	2								44.5467
78.5216	66.3199	3.65962	1.04515	13	0.266667	3.46154	5								44.6289
29.7667	47.1832	3.67348	0.661483	7	0.444444	2.71429	4								44.8072
0	13.3582	2.59213	0	1	0	1	1								45.0396
54.7946	45.365	3.27762	1.02429	13	0.407407	3.61538	5								45.3774
63.6824	80.51	4.03635	0.973109	13	0.322222	3.30769	5								45.3839
70.4362	73.4047	3.91875	1.12254	3	0	1.66667	2								45.8726
0	8.10391	2.09235	0	1	0	1	1								46.0515
23.5219	30.9729	3.11916	0.898963	7	0.444444	2.71429	4								46.1098
27.3083	35.3557	3.32987	0.712911	9	0.333333	2.77778	4								46.237
27.4698	33.8099	3.31249	0.769323	3	0	1.66667	2								46.4318
49.7675	73.5656	4.04336	0.829041	7	0	2.42857	3								46.4803
47.8849	63.6618	3.78435	1.23048	3	0	1.66667	2								46.9442
0	143.142	4.96384	0	1	0	1	1								47.0944
39.3613	41.3819	3.46223	0.677123	13	0.796296	4.23077	7								47.1407
17.1588	21.4891	2.81254	0.819386	5	1	2.2	3								48.04
98.1382	51.1158	3.08445	1.15724	9	0.65	3.22222	5								48.1061
0	74.6526	4.31285	0	1	0	1	1								48.2745
0	76.9268	4.34285	0	1	0	1	1								48.2761
22.5244	32.4135	3.32813	0.654498	3	0	1.66667	2								48.4851
8.72402	14.3045	2.50339	0.728567	3	0	1.66667	2								49.1739
27.1732	40.0577	3.39958	0.858184	15	0.452381	3.66667	6								49.5577
56.9397	48.6594	3.36108	1.02319	15	0.761905	3.66667	6								49.6438
48.1378	53.0582	3.63717	0.866911	29	0.678022	5	8								50.0774
34.3419	34.161	3.20133	0.813444	13	0.388889	3.61538	5								50.5818
19.1027	61.8141	4.0933	0.301519	3	0	1.66667	2								50.7437
0	25.0516	3.22094	0	1	0	1	1								51.2423
31.0966	42.6277	3.58981	0.67514	3	0	1.66667	2								51.5242
0	32.8279	3.49128	0	1	0	1	1								51.6677
43.7189	41.2583	3.33543	0.947321	5	1	2.2	3								51.9042
51.4019	68.5684	3.92402	0.947386	7	0.444444	2.71429	4								52.1247
0	29.3656	3.37982	0	1	0	1	1								52.3946
0	46.2296	3.83362	0	1	0	1	1								52.5691
38.7388	41.4771	3.38908	0.880946	11	0.5	3.18182	5								52.6617
20.2087	46.9925	3.73338	0.605802	5	1	2.2	3								52.8735
0	8.71646	2.16521	0	1	0	1	1								52.9659
0	38.5377	3.65164	0	1	0	1	1								52.9667
35.5429	49.2212	3.54556	0.977958	13	0.322222	3.30769	5								53.0787
0	9.02173	2.19964	0	1	0	1	1								53.599
48.8545	54.7922	3.5681	1.0525	11	0.5	3.18182	5								54.0674
0	139.419	4.93748	0	1	0	1	1								54.189
42.5557	58.9641	3.86485	0.840364	3	0	1.66667	2								54.4565
32.326	52.9917	3.79071	0.800523	3	0	1.66667	2								54.7277
35.0152	59.5016	3.96051	0.626844	3	0	1.66667	2								55.0141
27.7564	32.482	3.04082	1.07089	9	0.55	3	4								55.7316
31.5637	49.0794	3.67984	0.728986	11	0.742857	3.72727	6								55.8288
15.9785	30.9246	3.34192	0.453246	5	1	2.2	3								55.9223
39.3499	41.4279	3.20531	1.14794	9	0.65	3.22222	5								56.2015
19.466	29.5936	3.19236	0.652616	15	0.52381	3.4	5								56.2552
23.6289	44.376	3.65342	0.573595	9	0.65	3.22222	5								56.2594
0	40.0765	3.69079	0	1	0	1	1								56.3496
0	13.4455	2.59865	0	1	0	1	1								56.6793
34.4988	32.4987	2.98213	1.11979	5	1	2.2	3								56.6915
0	18.9864	2.94372	0	1	0	1	1								56.9493
73.2847	57.1254	3.64234	0.823088	13	0.266667	3.46154	5								57.1165
0	39.3976	3.67371	0	1	0	1	1								57.4671
25.5724	38.932	3.43947	0.721255	19	0.416667	4.26316	7								57.4766
68.2423	60.5413	3.57725	1.15697	7	0.444444	2.71429	4								57.5953
0	18.9294	2.94072	0	1	0	1	1								57.7675
40.0369	46.5006	3.60011	0.701358	15	0.52381	3.4	5								57.9555
35.7574	44.8737	3.51	1.0228	3	0	1.66667	2								58.8296
0	22.057	3.09363	0	1	0	1	1								59.265
40.9015	51.6419	3.63844	0.88981	9	0.65	3.22222	5								59.6809
38.3093	45.7974	3.60522	0.785519	3	0	1.66667	2								60.0919
41.3801	48.8548	3.51486	0.976777	11	0.5	3.18182	5								60.9785
0	21.8186	3.08276	0	1	0	1	1								61.0287
0	21.2443	3.05609	0	1	0	1	1								61.4103
45.1929	46.1228	3.3526	1.06127	11	0.342857	3.54545	5								61.7396
58.0062	63.0992	3.87702	0.771494	5	1	2.2	3								61.7606
31.09	36.4202	3.22298	0.967911	7	0	2.42857	3								61.8285
83.8739	80.8255	3.94973	1.10205	5	1	2.2	3								61.9408
96.8818	72.7045	3.61867	1.38557	3	0	1.66667	2								62.711
0	47.3873	3.85836	0	1	0	1	1								62.7316
29.1501	55.9869	3.82522	0.783077	9	0.65	3.22222	5								62.9615
0	45.4151	3.81585	0	1	0	1	1								62.9698
22.3748	31.0313	3.11242	1.13539	3	0	1.66667	2								63.1411
37.5154	38.8998	3.1591	1.19771	5	1	2.2	3								63.47
62.6453	69.9912	3.62922	1.45602	5	1	2.2	3								63.5798
33.2258	62.3667	3.92038	0.803205	11	0.5	3.18182	5								63.6223
0	30.4687	3.4167	0	1	0	1	1								63.7718
25.4113	43.5832	3.61982	0.644077	5	1	2.2	3								64.1428
52.578	58.5863	3.81946	0.679531	11	0.5	3.18182	5								64.1685
12.8057	13.3281	2.29917	0.898437	3	0	1.66667	2								64.3644
13.8918	36.2719	3.53595	0.418572	3	0	1.66667	2								64.4014
0	18.7535	2.93138	0	1	0	1	1								64.9379
14.3409	18.8939	2.67881	0.955205	3	0	1.66667	2								65.2396
0	14.9584	2.70527	0	1	0	1	1								65.8747
53.9382	54.5685	3.56718	1.08242	5	1	2.2	3								66.5521
0	7.82268	2.05703	0	1	0	1	1								66.9459
0	6.8067	1.91791	0	1	0	1	1								68.1739
69.3099	76.8484	3.83236	1.45592	3	0	1.66667	2								68.2748
45.5229	116.68	4.71186	0.370848	3	0	1.66667	2								68.7142
0	109.379	4.69482	0	1	0	1	1								68.92
45.4918	72.1184	4.11443	0.640342	5	1	2.2	3								68.9843
174.641	121.32	3.74795	1.93638	3	0	1.66667	2								69.1188
123.139	96.9609	3.69411	1.87087	3	0	1.66667	2								69.312
36.1038	51.0574	3.57855	1.11535	5	1	2.2	3								69.4856
38.2347	64.42	3.99938	0.627472	9	0.65	3.22222	5								70.0199
36.5089	39.4193	3.20037	1.17243	5	1	2.2	3								70.0457
49.5362	52.2501	3.53242	1.03774	7	0.444444	2.71429	4								70.6196
0	41.9419	3.73629	0	1	0	1	1								71.863
44.6189	67.553	4.00731	0.699218	9	0.65	3.22222	5								71.9411
37.6799	43.949	3.53952	0.673171	23	0.721212	5.17391	9								72.5941
34.018	33.9713	3.114	0.934432	9	0.333333	2.77778	4								73.3021
20.4123	25.3597	2.92067	0.856246	9	0.333333	2.77778	4								73.3317
30.7465	52.9757	3.82055	0.626497	5	1	2.2	3								73.658
158.821	140.882	4.49762	1.1519	3	0	1.66667	2								73.9861
18.495	31.8207	3.3474	0.580589	3	0	1.66667	2								74.2226
45.4811	47.3886	3.57632	0.782745	5	1	2.2	3								75.4488
24.8501	41.958	3.50304	0.794445	11	0.1	3	4								77.4866
12.6004	43.0737	3.73361	0.260129	5	1	2.2	3								77.7003
5.12168	28.8372	3.3472	0.196856	5	1	2.2	3								78.6429
0	62.5249	4.13557	0	1	0	1	1								79.1904
94.8917	94.4624	4.09242	1.05473	9	0.55	3	4								79.3705
17.9873	25.5319	3.04179	0.684243	7	0	2.42857	3								79.6451
42.4575	41.9301	3.36118	1.07506	3	0	1.66667	2								80.5528
63.6718	80.895	4.06101	1.02005	5	1	2.2	3								81.6031
															82.5019
															83.72
															84.3784
															84.8666
															84.8845
															85.3978
															85.4959
															86.1341
															86.2116
															86.4761
															87.0324
															87.0643
															87.707
															88.0671
															88.3713
															88.8808
															89.021
															89.9015
															91.0956
															91.7256
															92.7558
															92.9272
															93.3294
															93.4897
															93.5394
															94.067
															94.697
															94.9737
															95.5693
															101.764
															102.19
															103.711
															103.934
															105.598
															106.854
															109.619
															111.493
															111.788
															113.951
															113.977
															114.389
															116.224
															116.746
															121.545
															121.871
															122.23
															124.062
															124.356
															126.129
															129.746
															132.352
															132.752
															135.055
															135.469
															136.251
															138.289
															140.62
															140.991
															142.101
															142.208
															143.443
															145.849
															146.312
															151.495
															152.609
															154.27
															155.11
															155.171
															155.349
															161.739
															169.223
															179.85
															202.85
															211.77
															217.08
															224.009
															224.399
															235.874
															265.937
															271.102
															285.149
															352.388

## Sheet: Cx3D
										Cx3D
								Solutions in cx3d
				Individual statistics
													Segment-Lengths
Std of segment length	Mean of segment length	Mean of fitted distribution	Std of fitted distribution	Number of branches	Asymmetry	Average depth of florets	Maximal depth of florets						1.97716
15.7168	108.526	4.68028	0.140397	3	0	1.66667	2						2.02934
72.0256	75.74	3.77861	1.25858	7	1	2.71429	4						2.05609
38.0251	33.1687	3.0148	1.09438	5	1	2.2	3						2.086
0	43.4075	3.77063	0	1	0	1	1						2.13825
0	104.718	4.65127	0	1	0	1	1						2.15375
0	106.314	4.6664	0	1	0	1	1						2.27022
24.5536	26.2161	2.79112	1.06859	19	0.666667	4.15789	7						2.30496
30.6814	58.4291	3.94212	0.559574	7	1	2.71429	4						2.35969
35.8039	42.2678	3.2765	1.2728	7	0.444444	2.71429	4						2.40532
44.0348	45.5749	3.35092	1.05639	9	0.55	3	4						2.47034
0	48.0469	3.87218	0	1	0	1	1						2.4811
0	17.2805	2.84958	0	1	0	1	1						2.48944
39.4871	44.8473	3.39641	1.11717	5	0.5	2.2	3						2.50152
27.1543	44.582	3.63993	0.729717	3	0	1.66667	2						2.52597
0	191.183	5.25323	0	1	0	1	1						2.52747
76.3112	70.6957	3.60912	1.33999	7	0.444444	2.71429	4						2.5663
0	48.8272	3.88829	0	1	0	1	1						2.56825
0	28.0739	3.33484	0	1	0	1	1						2.60689
50.2778	46.0041	3.43212	0.968408	5	0.5	2.2	3						2.64388
0	59.206	4.08102	0	1	0	1	1						2.65055
0	45.0199	3.8071	0	1	0	1	1						2.66473
50.2726	52.8295	3.49526	1.16198	9	0.25	3	4						2.74204
22.7634	28.414	2.9099	1.09302	13	0.7	3.30769	5						2.83166
0	37.2091	3.61655	0	1	0	1	1						2.83578
30.0504	34.8459	3.13908	0.995694	19	0.559259	4.89474	8						2.90204
120.156	144.711	4.69561	0.963289	3	0	1.66667	2						2.91579
0	39.6827	3.68092	0	1	0	1	1						2.9632
0	33.8357	3.52152	0	1	0	1	1						2.98794
40.1215	45.3447	3.49391	0.866483	9	0.333333	2.77778	4						3.04354
0	13.7685	2.62239	0	1	0	1	1						3.05114
49.5005	83.7058	4.2132	0.785058	7	1	2.71429	4						3.10155
47.3168	48.2477	3.32461	1.36122	5	1	2.2	3						3.10901
0	28.6357	3.35465	0	1	0	1	1						3.11581
68.9177	86.4243	4.09957	1.00327	7	0.666667	2.71429	4						3.11663
0	14.3543	2.66405	0	1	0	1	1						3.13171
51.0024	78.0243	4.11678	0.956464	3	0	1.66667	2						3.1329
76.4823	89.1611	3.88494	1.67677	3	0	1.66667	2						3.20611
45.6836	72.1253	4.14295	0.638191	3	0	1.66667	2						3.21687
0	8.23025	2.10782	0	1	0	1	1						3.24694
109.435	81.6367	3.82282	1.12903	5	1	2.2	3						3.276
0	113.607	4.73275	0	1	0	1	1						3.29312
0	22.3836	3.10833	0	1	0	1	1						3.30868
0	75.3171	4.32171	0	1	0	1	1						3.37893
0	7.81372	2.05588	0	1	0	1	1						3.38611
108.978	93.1663	3.81947	1.39761	7	0.444444	2.71429	4						3.41201
0	29.3285	3.37856	0	1	0	1	1						3.41415
61.1745	66.6506	3.61237	1.30414	9	0.25	3	4						3.42153
0	137.663	4.92481	0	1	0	1	1						3.42435
32.9624	44.8743	3.44846	1.20701	3	0	1.66667	2						3.46158
17.2139	38.9629	3.57678	0.540638	3	0	1.66667	2						3.51422
18.349	19.4671	2.65191	0.983846	3	0	1.66667	2						3.51637
29.6302	40.844	3.25869	1.35278	5	1	2.2	3						3.53649
0	63.3618	4.14886	0	1	0	1	1						3.55784
45.4214	42.6802	3.17714	1.15196	15	0.489177	3.93333	6						3.65935
0	50.0823	3.91367	0	1	0	1	1						3.69057
29.9105	33.7001	3.09877	1.03377	31	0.401587	5.12903	8						3.7022
43.1336	47.7703	3.23701	1.69844	3	0	1.66667	2						3.70308
0	57.3822	4.04973	0	1	0	1	1						3.77451
0	100.575	4.6109	0	1	0	1	1						3.82203
26.8632	25.9754	2.88404	1.05246	3	0	1.66667	2						3.89022
0	10.1159	2.31411	0	1	0	1	1						3.93294
36.2675	36.5607	3.27702	0.855185	5	1	2.2	3						3.9631
0	77.8432	4.3547	0	1	0	1	1						4.01214
0	13.8981	2.63175	0	1	0	1	1						4.03426
62.3521	40.7705	2.61253	1.83345	3	0	1.66667	2						4.04882
34.3968	44.5421	3.53415	0.743862	19	0.259259	3.73684	5						4.08219
0	99.7834	4.603	0	1	0	1	1						4.11353
71.815	57.1295	3.47458	1.16713	5	1	2.2	3						4.2726
34.6543	43.8062	3.35272	1.19746	5	0.5	2.2	3						4.3085
0	49.795	3.90791	0	1	0	1	1						4.33207
0	6.60153	1.8873	0	1	0	1	1						4.3354
35.4227	31.4264	2.76917	1.35683	5	1	2.2	3						4.36028
0	34.1552	3.53092	0	1	0	1	1						4.38667
0	29.6622	3.38987	0	1	0	1	1						4.4717
0	18.2208	2.90256	0	1	0	1	1						4.60548
44.9373	45.5291	3.32819	1.16146	11	0.64	3.54545	5						4.65612
43.2367	50.4867	3.66944	0.870766	3	0	1.66667	2						4.67772
0	21.2973	3.05858	0	1	0	1	1						4.67869
0	14.8331	2.69686	0	1	0	1	1						4.70119
0	97.8122	4.58305	0	1	0	1	1						4.70191
31.2384	35.9687	3.21582	1.03483	5	1	2.2	3						4.70545
0	38.4536	3.64945	0	1	0	1	1						4.73343
39.7638	44.2946	3.26444	1.18407	35	0.44887	5.51429	9						4.75555
16.482	18.5993	2.50154	1.05071	9	0.333333	2.77778	4						4.76526
22.9027	32.7203	3.20864	0.836672	29	0.245321	4.44828	6						4.79254
65.5158	61.5823	3.77362	0.80989	11	0.466667	3.36364	5						4.80852
45.5026	56.5584	3.58773	1.21512	15	0.593074	4.46667	7						4.94694
0	88.3006	4.48075	0	1	0	1	1						4.96509
0	18.1373	2.89797	0	1	0	1	1						4.96988
0	2.57746	0.946803	0	1	0	1	1						4.98373
0	166.768	5.1166	0	1	0	1	1						4.98814
0	154.193	5.03821	0	1	0	1	1						5.00272
0	55.445	4.01539	0	1	0	1	1						5.13501
41.0939	52.8718	3.71476	0.754669	15	0.666667	4.06667	7						5.14802
39.4622	38.5937	3.38807	0.676907	9	0.65	3.22222	5						5.15005
51.7128	63.2882	3.74921	1.01723	17	0.470238	3.82353	6						5.15163
0	21.6842	3.07658	0	1	0	1	1						5.22262
0	6.26076	1.8343	0	1	0	1	1						5.23214
34.7502	38.619	3.18936	1.08178	25	0.293711	4.68	7						5.3458
24.9313	32.8381	3.08819	1.13453	7	0	2.42857	3						5.35664
0	89.7232	4.49673	0	1	0	1	1						5.36814
39.2514	41.2109	3.44716	0.760149	5	1	2.2	3						5.37523
12.2043	23.3118	3.01581	0.688048	3	0	1.66667	2						5.41166
0	41.6257	3.72872	0	1	0	1	1						5.4189
31.488	39.3591	3.3901	0.786134	13	0.7	3.30769	5						5.49618
29.9581	36.0089	3.13086	1.11877	13	0.388889	3.61538	5						5.55163
0	81.9117	4.40564	0	1	0	1	1						5.60557
44.9051	55.7276	3.60377	1.05731	15	0.380952	3.4	5						5.60618
49.3749	40.5272	2.89609	1.44336	13	0.322222	3.30769	5						5.61358
0	35.2752	3.56318	0	1	0	1	1						5.64771
0	63.6734	4.15377	0	1	0	1	1						5.67592
0	61.9524	4.12637	0	1	0	1	1						5.73076
46.639	37.8445	2.97641	1.21117	11	0.64	3.54545	5						5.78706
22.0642	23.1464	2.74135	1.0035	5	1	2.2	3						5.79035
30.3112	35.7489	3.23	0.923994	13	0.525926	3.76923	6						5.7947
17.6598	28.4791	3.05887	0.966915	7	1	2.71429	4						5.80618
0	46.8085	3.84606	0	1	0	1	1						5.86988
0	136.298	4.91485	0	1	0	1	1						5.87275
89.0342	97.6932	3.96225	1.67408	3	0	1.66667	2						5.93641
54.4704	39.0092	3.05962	1.1091	9	0.75	3.22222	5						5.98216
0	100.086	4.60603	0	1	0	1	1						5.98799
0	158.224	5.06401	0	1	0	1	1						6.0951
0	18.729	2.93007	0	1	0	1	1						6.13674
0	51.666	3.9448	0	1	0	1	1						6.17512
0	28.4705	3.34887	0	1	0	1	1						6.17512
43.8814	45.4103	3.3456	1.07827	17	0.470238	3.82353	6						6.25118
0	174.265	5.16058	0	1	0	1	1						6.28685
0	32.1933	3.47176	0	1	0	1	1						6.34379
61.6829	65.7456	3.67142	1.44342	3	0	1.66667	2						6.345
18.5003	25.1925	2.95554	0.820371	11	0.7	3.18182	5						6.39338
0	65.8623	4.18757	0	1	0	1	1						6.39745
0	7.96813	2.07545	0	1	0	1	1						6.40113
45.1299	55.4367	3.38683	1.74474	3	0	1.66667	2						6.41154
38.0007	63.2028	3.95249	0.718164	7	0.444444	2.71429	4						6.42238
32.1998	35.8591	3.06823	1.18219	15	0.761905	3.66667	6						6.49176
67.6696	87.6179	4.11585	0.93987	13	0.322222	3.30769	5						6.56704
0	68.422	4.22569	0	1	0	1	1						6.59989
0	50.8919	3.9297	0	1	0	1	1						6.64715
0	235.44	5.46145	0	1	0	1	1						6.66189
0	159.266	5.07058	0	1	0	1	1						6.68528
36.5497	43.6377	3.37174	1.09415	13	0.488889	3.30769	5						6.71094
0	56.0963	4.02707	0	1	0	1	1						6.76085
0	25.2742	3.22978	0	1	0	1	1						6.76191
15.7887	29.8983	3.27816	0.504769	15	0.47619	3.53333	5						6.88805
31.1226	62.2211	4.01475	0.539278	7	1	2.71429	4						6.89321
0	57.6696	4.05473	0	1	0	1	1						6.91918
25.7937	33.0025	3.06364	1.10345	21	0.194444	3.7619	5						6.98086
0	12.9576	2.56168	0	1	0	1	1						6.98358
11.7199	23.8285	3.06639	0.521232	5	1	2.2	3						6.99343
41.6102	39.757	3.18289	1.09124	15	0.742857	3.93333	6						7.0181
0	38.4972	3.65059	0	1	0	1	1						7.01842
76.9703	90.2081	4.2305	0.927535	3	0	1.66667	2						7.03081
11.1636	28.7413	3.29867	0.440659	3	0	1.66667	2						7.04938
0	52.1798	3.9547	0	1	0	1	1						7.0571
42.9287	46.5318	3.33894	1.26967	5	1	2.2	3						7.06369
13.5289	22.7913	3.01	0.588054	3	0	1.66667	2						7.08177
20.8408	32.1741	3.31562	0.621099	5	0.5	2.2	3						7.09425
0	16.5685	2.80751	0	1	0	1	1						7.106
0	44.6403	3.79864	0	1	0	1	1						7.12046
46.6374	46.61	3.26795	1.22093	7	0	2.42857	3						7.15398
0	71.7883	4.27372	0	1	0	1	1						7.16092
0	11.5618	2.4477	0	1	0	1	1						7.17092
32.2778	27.4156	2.86689	0.965389	9	0.583333	3.22222	5						7.19173
0	54.6574	4.00109	0	1	0	1	1						7.23979
33.2294	32.1442	2.97193	1.07714	13	0.2	3.15385	4						7.26188
0	139.044	4.93479	0	1	0	1	1						7.32738
0	88.1902	4.4795	0	1	0	1	1						7.36036
0	37.2746	3.61831	0	1	0	1	1						7.3809
0	66.6834	4.19996	0	1	0	1	1						7.39049
0	10.1285	2.31536	0	1	0	1	1						7.55255
0	162.446	5.09034	0	1	0	1	1						7.57479
0	44.8203	3.80266	0	1	0	1	1						7.60096
0	182.966	5.2093	0	1	0	1	1						7.6443
0	156.859	5.05535	0	1	0	1	1						7.65725
48.1344	39.7479	3.22109	0.962704	9	0.333333	2.77778	4						7.67908
0	36.909	3.60846	0	1	0	1	1						7.74005
0	77.646	4.35216	0	1	0	1	1						7.74281
0	76.0936	4.33196	0	1	0	1	1						7.79708
17.8879	38.7376	3.56632	0.551445	3	0	1.66667	2						7.79833
0	108.618	4.68784	0	1	0	1	1						7.84091
53.1002	38.4988	2.95887	1.2265	15	0.539889	3.93333	6						7.85716
0	42.7105	3.75444	0	1	0	1	1						7.97364
28.8447	48.8977	3.63027	0.877709	13	0.472222	3.76923	6						8.02313
46.1377	47.6401	3.54899	0.957573	3	0	1.66667	2						8.06083
39.7773	62.0015	3.94049	0.714391	5	1	2.2	3						8.1026
31.321	32.0538	2.99172	1.09336	19	0.435185	3.94737	6						8.11454
54.366	47.8506	3.43131	1.11134	3	0	1.66667	2						8.12102
29.3107	31.7908	3.05206	0.99321	25	0.457672	4.92	7						8.12931
0	35.1116	3.55853	0	1	0	1	1						8.14501
0	133.802	4.89636	0	1	0	1	1						8.15838
45.399	45.8843	3.50261	0.791635	15	0.452381	3.66667	6						8.18673
0	35.3354	3.56489	0	1	0	1	1						8.20183
34.5383	44.6147	3.41786	0.984362	15	0.380952	3.53333	5						8.21704
0	48.74	3.8865	0	1	0	1	1						8.28026
0	22.1883	3.09957	0	1	0	1	1						8.3181
0	94.5845	4.54949	0	1	0	1	1						8.33307
0	86.6355	4.46171	0	1	0	1	1						8.36082
0	12.1788	2.4997	0	1	0	1	1						8.39276
51.0987	89.0668	4.31892	0.78964	3	0	1.66667	2						8.41806
38.1547	43.9964	3.41899	0.919262	11	0.466667	3.36364	5						8.51687
29.304	48.6665	3.66971	0.785831	7	0	2.42857	3						8.53288
31.596	48.2107	3.51936	1.17549	5	0.5	2.2	3						8.54758
31.4453	31.8001	2.9603	1.15783	5	1	2.2	3						8.56081
36.1083	74.0103	4.19895	0.600071	3	0	1.66667	2						8.5821
34.3915	49.5216	3.57753	1.02174	15	0.52381	3.4	5						8.64009
19.3633	35.2541	3.41898	0.595606	7	0	2.42857	3						8.65632
26.3244	39.409	3.42193	0.806569	13	0.366667	3.15385	4						8.67221
0	78.0413	4.35724	0	1	0	1	1						8.6741
0	16.9839	2.83227	0	1	0	1	1						8.70388
31.3741	27.7721	2.91368	0.896505	13	0.322222	3.30769	5						8.71869
46.7831	60.6728	3.82395	0.852831	7	0	2.42857	3						8.76464
6.84227	17.5163	2.78307	0.478918	5	0.5	2.2	3						8.82508
													8.82785
													8.84228
													8.85204
													8.87027
													8.91131
													8.91541
													8.92097
													8.98736
													8.98858
													9.0229
													9.03443
													9.09005
													9.10896
													9.14142
													9.15317
													9.18661
													9.20013
													9.2207
													9.26004
													9.26718
													9.27311
													9.28361
													9.3122
													9.32127
													9.36669
													9.38898
													9.3961
													9.46181
													9.47582
													9.49212
													9.50864
													9.54465
													9.56779
													9.58185
													9.59962
													9.63821
													9.68375
													9.72102
													9.94316
													9.97608
													9.98263
													9.98831
													9.99606
													10.0008
													10.0072
													10.1079
													10.1639
													10.279
													10.333
													10.3598
													10.3841
													10.3872
													10.4378
													10.486
													10.5449
													10.5453
													10.5453
													10.555
													10.5681
													10.6008
													10.625
													10.6991
													10.7069
													10.721
													10.7347
													10.7756
													10.7798
													10.8531
													10.8634
													10.8911
													10.9005
													10.9149
													10.9449
													11.0017
													11.0071
													11.0206
													11.0261
													11.1055
													11.1419
													11.2047
													11.2388
													11.2462
													11.2966
													11.3024
													11.3131
													11.3315
													11.3337
													11.3712
													11.4001
													11.4234
													11.4351
													11.4481
													11.4952
													11.5349
													11.5692
													11.6005
													11.6046
													11.6075
													11.6166
													11.6411
													11.6741
													11.6893
													11.7349
													11.7564
													11.8097
													11.8444
													11.8692
													11.8703
													12.003
													12.0078
													12.0326
													12.116
													12.1244
													12.1545
													12.1974
													12.2075
													12.2964
													12.3203
													12.3617
													12.3765
													12.4305
													12.4963
													12.6001
													12.6859
													12.7149
													12.7199
													12.8046
													12.9078
													12.9188
													12.9738
													13.0185
													13.0609
													13.0664
													13.2185
													13.2279
													13.2684
													13.3007
													13.3221
													13.3401
													13.3569
													13.4013
													13.4111
													13.4916
													13.503
													13.5039
													13.5407
													13.563
													13.6008
													13.7437
													13.7682
													13.7759
													13.7924
													13.7984
													13.8278
													13.9068
													13.9694
													13.9845
													14.001
													14.1001
													14.1096
													14.1437
													14.1584
													14.1629
													14.1823
													14.1917
													14.2617
													14.3661
													14.4699
													14.5207
													14.6109
													14.6442
													14.6452
													14.6535
													14.7373
													14.7604
													14.7674
													14.8168
													14.8901
													14.9147
													14.9583
													14.9801
													14.9954
													15.0122
													15.0184
													15.059
													15.1037
													15.214
													15.2938
													15.4506
													15.4589
													15.4675
													15.4759
													15.5224
													15.5988
													15.6659
													15.7588
													15.8441
													15.8817
													15.9155
													16.1282
													16.131
													16.1415
													16.2445
													16.2884
													16.3075
													16.312
													16.3395
													16.3439
													16.3442
													16.4371
													16.4567
													16.486
													16.4869
													16.5156
													16.6402
													16.6471
													16.6669
													16.6741
													16.6766
													16.6929
													16.7909
													16.8674
													16.8896
													16.9183
													16.9296
													16.9463
													16.951
													17.1484
													17.2088
													17.2168
													17.2214
													17.3095
													17.3102
													17.3107
													17.3112
													17.3724
													17.3795
													17.4053
													17.4214
													17.5054
													17.7493
													17.8386
													17.901
													17.9768
													17.9949
													18.016
													18.0516
													18.0816
													18.0904
													18.1652
													18.1908
													18.2744
													18.2806
													18.3119
													18.3432
													18.3753
													18.4137
													18.4221
													18.4379
													18.4435
													18.5174
													18.6186
													18.6399
													18.7818
													18.7848
													18.7888
													18.8002
													18.8045
													18.8832
													18.8911
													18.9216
													18.9987
													19.0681
													19.1213
													19.1368
													19.1861
													19.1921
													19.2019
													19.294
													19.3605
													19.4073
													19.5276
													19.5553
													19.7466
													19.7896
													19.8827
													19.8971
													19.8989
													19.9344
													20.0981
													20.1044
													20.1407
													20.1472
													20.2158
													20.2527
													20.2847
													20.3191
													20.3609
													20.4113
													20.4486
													20.4793
													20.5194
													20.5237
													20.5639
													20.5768
													20.6004
													20.608
													20.7061
													20.7496
													20.7834
													20.7933
													20.816
													20.8934
													20.9005
													20.9333
													20.9423
													20.9795
													21.152
													21.1985
													21.2083
													21.2125
													21.2225
													21.2665
													21.2692
													21.2942
													21.3205
													21.3825
													21.4006
													21.4184
													21.4264
													21.4938
													21.5235
													21.5543
													21.57
													21.5942
													21.6222
													21.6352
													21.6974
													21.8124
													21.8582
													21.8603
													21.8633
													21.8974
													21.8993
													21.9313
													22.1093
													22.2031
													22.2086
													22.2315
													22.2557
													22.2801
													22.2863
													22.2976
													22.4412
													22.4461
													22.4512
													22.4779
													22.5154
													22.5344
													22.5945
													22.6079
													22.9231
													22.9361
													22.9798
													22.9916
													23.022
													23.0389
													23.1343
													23.1534
													23.1991
													23.3059
													23.3892
													23.3998
													23.4222
													23.44
													23.5473
													23.6436
													23.8455
													23.9021
													23.9534
													23.9842
													23.9963
													23.9969
													24.0075
													24.0133
													24.0195
													24.0455
													24.0797
													24.1034
													24.1346
													24.152
													24.1886
													24.2203
													24.2854
													24.3792
													24.43
													24.4837
													24.4968
													24.5623
													24.567
													24.6477
													24.648
													24.7436
													24.751
													24.7763
													24.8117
													24.9967
													25.0038
													25.0043
													25.0235
													25.0392
													25.0923
													25.1279
													25.1289
													25.1506
													25.1551
													25.1555
													25.2072
													25.2443
													25.2789
													25.2992
													25.3137
													25.3967
													25.4243
													25.448
													25.5317
													25.5683
													25.6586
													25.6636
													25.725
													25.789
													25.9352
													25.9757
													26.0418
													26.1055
													26.2074
													26.2819
													26.3234
													26.336
													26.3701
													26.4161
													26.4231
													26.4366
													26.4484
													26.4573
													26.4592
													26.4742
													26.4849
													26.5077
													26.5385
													26.7325
													26.8255
													26.8406
													26.8562
													26.9139
													27.0191
													27.0359
													27.067
													27.1663
													27.2347
													27.2534
													27.2538
													27.3792
													27.4089
													27.4597
													27.4875
													27.579
													27.5896
													27.6129
													27.639
													27.6424
													27.6743
													27.6842
													27.6854
													27.7362
													27.8108
													27.815
													27.9542
													27.9754
													27.9825
													27.9856
													28.028
													28.028
													28.0693
													28.0795
													28.0985
													28.1575
													28.1689
													28.2136
													28.2335
													28.388
													28.4401
													28.5145
													28.5538
													28.6849
													28.6964
													28.8122
													28.8777
													28.9375
													29.0631
													29.1036
													29.1249
													29.186
													29.507
													29.5731
													29.6252
													29.6635
													29.7121
													29.7587
													29.7761
													29.7855
													29.787
													29.8172
													29.8571
													29.9169
													30.0626
													30.0749
													30.0872
													30.1289
													30.212
													30.2461
													30.2961
													30.3296
													30.3531
													30.4098
													30.4099
													30.4237
													30.4277
													30.5082
													30.5182
													30.6034
													30.6059
													30.6318
													30.635
													30.7185
													30.7402
													30.7571
													30.8123
													30.8176
													30.8355
													30.8576
													30.8677
													30.9327
													31.0693
													31.167
													31.2345
													31.3005
													31.3137
													31.333
													31.4313
													31.4335
													31.4587
													31.4857
													31.5672
													31.6065
													31.7106
													31.718
													31.7716
													31.7867
													31.8207
													31.8764
													31.9224
													31.9283
													31.9904
													32.0989
													32.1315
													32.1341
													32.1664
													32.1791
													32.2052
													32.2187
													32.231
													32.2473
													32.2538
													32.366
													32.3817
													32.4016
													32.4511
													32.479
													32.6086
													32.7331
													32.7685
													32.8212
													32.8468
													32.8986
													32.9156
													32.9242
													32.9346
													32.9856
													33.0289
													33.0822
													33.1068
													33.3493
													33.3546
													33.3625
													33.3668
													33.3722
													33.4087
													33.4349
													33.4375
													33.4583
													33.4799
													33.5043
													33.5284
													33.5676
													33.5686
													33.6529
													33.6604
													33.6961
													33.7304
													33.808
													33.8639
													33.8844
													33.9966
													34.0206
													34.034
													34.0938
													34.2371
													34.2465
													34.2642
													34.2682
													34.325
													34.3661
													34.4783
													34.5038
													34.5929
													34.6422
													34.6485
													34.8309
													34.8617
													34.8823
													35.0477
													35.0877
													35.283
													35.3062
													35.3285
													35.3967
													35.6773
													35.7192
													35.7556
													35.7943
													35.8003
													35.8941
													35.93
													36.0928
													36.1269
													36.1712
													36.193
													36.2042
													36.2386
													36.241
													36.3115
													36.3596
													36.3803
													36.4566
													36.5069
													36.5091
													36.5477
													36.6421
													36.6581
													36.7267
													36.7522
													36.7944
													36.8815
													37.0496
													37.0497
													37.0547
													37.0873
													37.1089
													37.1616
													37.1891
													37.2059
													37.211
													37.2326
													37.3387
													37.469
													37.6657
													37.667
													37.6982
													37.7504
													37.7918
													37.8396
													37.8702
													37.9923
													38.1156
													38.1474
													38.2083
													38.2531
													38.2642
													38.307
													38.3159
													38.537
													38.7214
													38.7939
													38.8694
													38.9796
													39.0333
													39.0508
													39.0526
													39.0939
													39.1127
													39.1675
													39.177
													39.1945
													39.2252
													39.2624
													39.3869
													39.4388
													39.4794
													39.5967
													39.6691
													39.697
													40.0044
													40.1865
													40.2394
													40.343
													40.4648
													40.6237
													40.6905
													40.7291
													40.7639
													40.7946
													40.8023
													40.9475
													41.0612
													41.1293
													41.1413
													41.1465
													41.2131
													41.2154
													41.2204
													41.25
													41.3214
													41.3476
													41.4702
													41.5216
													41.6014
													41.6355
													41.9395
													41.969
													42.0761
													42.19
													42.3816
													42.3854
													42.4005
													42.5117
													42.5129
													42.5593
													42.7078
													42.7584
													42.7873
													42.9909
													43.0449
													43.0773
													43.1637
													43.2154
													43.2317
													43.2489
													43.2671
													43.3096
													43.4064
													43.5001
													43.5052
													43.6098
													43.6569
													43.7512
													43.968
													44.0928
													44.1393
													44.1895
													44.2286
													44.2323
													44.3411
													44.3861
													44.5637
													44.6629
													45.0224
													45.1459
													45.1708
													45.2875
													45.4066
													45.4604
													45.5487
													45.563
													45.5679
													45.611
													45.684
													45.8397
													45.9548
													45.9747
													46.1589
													46.2913
													46.3191
													46.525
													46.5899
													46.6294
													46.6771
													46.7403
													46.8909
													46.9811
													47.0335
													47.0521
													47.1175
													47.156
													47.2428
													47.3966
													47.4046
													47.4459
													47.5557
													47.6053
													47.6084
													47.6396
													47.7168
													47.7469
													47.9435
													47.9764
													48.0851
													48.0894
													48.1364
													48.2512
													48.3455
													48.3948
													48.4346
													48.4619
													48.4803
													48.7904
													48.8637
													48.9463
													49.1604
													49.2029
													49.2336
													49.3014
													49.4415
													49.4836
													49.5202
													49.5255
													49.528
													49.6189
													49.6861
													49.7516
													49.8474
													49.879
													49.879
													49.896
													49.946
													50.1974
													50.2669
													50.2775
													50.3489
													50.3542
													50.4025
													50.7386
													50.7614
													50.8297
													50.9139
													51.1163
													51.1742
													51.1784
													51.1888
													51.2494
													51.3474
													51.5244
													51.6177
													51.7852
													51.8754
													51.9619
													51.9687
													52.0237
													52.0459
													52.0741
													52.1016
													52.4291
													52.5441
													52.5662
													52.5923
													52.6598
													52.7925
													52.876
													52.9826
													53.1086
													53.1472
													53.2167
													53.465
													53.5022
													53.5665
													53.5772
													53.6948
													53.7888
													54.2644
													54.2856
													54.2912
													54.3237
													54.3239
													54.3322
													54.3605
													54.4857
													54.5507
													54.5808
													54.6248
													54.6947
													54.9832
													55.1731
													55.198
													55.4263
													55.506
													55.519
													55.5836
													55.645
													55.7152
													55.77
													55.858
													56.0265
													56.2098
													56.6294
													56.6458
													56.8148
													56.8726
													56.9007
													57.0212
													57.0935
													57.1603
													57.1739
													57.1889
													57.3005
													57.6075
													57.6661
													57.7006
													57.7037
													57.8467
													57.9314
													57.9416
													58.0456
													58.1429
													58.1475
													58.2376
													58.2798
													58.2863
													58.3071
													58.4945
													58.9111
													59.0161
													59.0331
													59.108
													59.1649
													59.2234
													59.3233
													59.4126
													59.4407
													59.4951
													59.6016
													59.9706
													60.1081
													60.2136
													60.3616
													60.5848
													60.7054
													60.7218
													60.9037
													61.0048
													61.0308
													61.1177
													61.2039
													61.2087
													61.4314
													61.4615
													61.5772
													61.6086
													61.6137
													61.7949
													61.9659
													61.9772
													61.9954
													62.0769
													62.3291
													62.3559
													62.4796
													62.5614
													62.6885
													62.7322
													62.7896
													62.8042
													62.9419
													63.0611
													63.1563
													63.1766
													63.4952
													63.5169
													63.5661
													63.575
													63.6908
													63.7658
													63.9287
													64.0035
													64.0893
													64.1031
													64.1956
													64.3299
													64.3586
													64.4414
													64.4894
													64.6706
													64.6728
													64.7157
													64.7399
													64.8301
													64.8412
													65.0906
													65.1593
													65.2621
													65.5184
													65.6232
													65.7212
													65.8528
													65.8888
													65.9989
													66.0235
													66.0734
													66.1077
													66.1393
													66.3308
													66.3919
													66.5801
													66.7226
													66.8155
													66.9096
													66.9798
													67.4339
													67.5349
													67.5763
													67.6828
													68.1217
													68.2701
													68.3262
													68.5876
													68.7106
													68.7196
													68.7929
													69.2119
													69.3595
													69.3635
													69.5697
													69.6709
													69.7745
													69.9006
													70.4362
													70.7558
													71.001
													71.0242
													71.1704
													71.2093
													71.4712
													71.558
													71.7097
													71.9512
													72.1551
													72.2458
													72.5298
													72.5694
													72.7132
													72.8227
													73.2044
													73.3792
													73.6311
													73.7507
													74.0372
													74.0986
													74.6
													74.8308
													75.0153
													75.0209
													75.1077
													75.2571
													75.4775
													75.769
													75.7968
													75.8279
													75.8532
													75.8738
													76.0093
													76.0642
													76.2608
													76.4002
													76.4321
													76.5389
													76.6057
													76.7271
													76.8599
													77.048
													77.1729
													77.2527
													77.2629
													77.2874
													77.469
													77.6039
													77.6113
													77.8666
													78.2264
													78.2488
													78.3294
													78.519
													78.5772
													78.7373
													78.7663
													79.0343
													79.0572
													79.0841
													79.1103
													79.1583
													79.2009
													79.5558
													79.8713
													79.9774
													80.2749
													80.5098
													80.8438
													81.1032
													81.1215
													81.249
													81.3803
													81.5718
													81.6609
													81.8865
													81.9751
													82.238
													82.29
													82.2906
													82.8667
													83.182
													83.2828
													83.6776
													83.6887
													83.9117
													83.9756
													84.1099
													84.1207
													84.2116
													84.5033
													84.8701
													84.9525
													85.1469
													85.4408
													85.549
													85.6061
													85.8503
													86.4862
													86.491
													86.5459
													86.6682
													86.6709
													86.816
													86.9763
													87.1088
													87.5675
													87.5869
													87.5878
													87.847
													87.8713
													88.1342
													88.6808
													88.9546
													89.0847
													89.6358
													89.6656
													89.744
													89.8429
													89.8916
													89.9882
													90.0488
													90.1286
													90.9566
													91.0121
													91.6012
													91.6901
													91.7872
													92.559
													93.0632
													93.0887
													93.514
													93.869
													95.2925
													95.3907
													96.0697
													96.4434
													96.5755
													97.3274
													97.8945
													97.9446
													98.2795
													98.4069
													98.5586
													98.8335
													99.4802
													99.7535
													100.294
													100.355
													100.544
													100.602
													100.716
													100.763
													100.834
													100.893
													100.99
													101.747
													102.076
													102.221
													102.257
													102.814
													102.986
													103.048
													103.154
													103.26
													103.523
													103.584
													103.736
													104.192
													104.333
													105.761
													105.863
													105.931
													106.146
													106.183
													106.353
													106.422
													107.263
													107.324
													107.568
													108.191
													108.329
													108.451
													108.971
													109.095
													109.539
													109.964
													110.174
													110.266
													110.304
													110.374
													111.239
													111.401
													111.533
													112.514
													112.566
													112.657
													112.779
													114.114
													114.382
													114.969
													115.39
													115.573
													116.019
													116.03
													116.433
													116.521
													116.526
													116.697
													116.722
													116.785
													117.128
													117.148
													117.186
													117.576
													117.926
													118.519
													119.072
													120.306
													120.898
													121.228
													121.733
													121.745
													122.092
													122.715
													123.014
													123.529
													123.749
													124.155
													124.386
													124.696
													125.075
													125.811
													125.9
													126.119
													127.757
													128.091
													128.958
													129.225
													129.508
													129.69
													130.87
													131.567
													131.659
													132.658
													133.94
													134.451
													134.652
													135.114
													135.694
													135.904
													136.734
													136.815
													137.485
													137.983
													138.286
													138.419
													138.919
													139.051
													139.842
													139.847
													140.09
													142.444
													142.888
													143.506
													144.259
													145.235
													145.672
													146.848
													146.985
													147.565
													148.684
													151.955
													152.164
													152.642
													152.674
													153.738
													154.086
													154.29
													154.312
													156.334
													157.469
													157.797
													158.322
													158.599
													158.899
													159.908
													159.978
													160.787
													161.001
													161.017
													163.744
													163.888
													165.825
													165.834
													166.217
													166.35
													166.571
													167.152
													167.525
													168.849
													170.555
													171.413
													172.201
													172.362
													173.545
													176.113
													176.468
													177.062
													177.934
													178.623
													183.081
													183.247
													185.835
													188.279
													188.547
													192.485
													194.814
													204.285
													205.429
													205.849
													205.882
													211.824
													213.424
													218.91
													220.312
													222.302
													225.073
													227.576
													228.027
													230.505
													230.539
													237.629
													249.111
													261.585
													269.311
													277.062
													290.37
													305.574
													313.905
													323.007
